# Supplementary material for: A site-and-branch-heterogeneous model on an expanded dataset favor mitochondria as sister to known Alphaproteobacteria
Source: Research Square preprint supplement (doi:10.21203/rs.3.rs-557223/v1), 2021-05-28
Supplement: Supplementary file 1 [file 0a704aea568ffe700132e35f.xlsx]

## Sheet: Table S5
Table S5. G A R P/F I M N K Y ratios across taxa as compositionally heterogeneous sites are removed according to the ɀ metric.
Species	Group (GTDB taxonomy)	-0ɀ	-10ɀ	-20ɀ	-30ɀ	-40ɀ	-50ɀ	-60ɀ	-70ɀ	-80ɀ	-90ɀ
Acanthamoeba_castellanii	Mitochondria	0.925	0.916	0.913	0.943	0.977	1.015	1.081	1.124	0.81	0.591
Allomyces_macrogynus	Mitochondria	1.169	1.108	1.08	1.074	1.065	1.057	1.043	1.041	0.734	0.501
Alphaproteobacteria_bacterium_TMED2	o__Micavibrionales_C;f__TMED2	1.254	1.089	0.982	0.91	0.855	0.802	0.773	0.706	0.449	0.234
Andalucia_godoyi	Mitochondria	1.011	0.979	0.964	0.972	0.957	0.954	0.951	0.93	0.633	0.433
Capsaspora_owczarzaki	Mitochondria	1.073	1.025	0.996	1.006	0.998	1	1.009	1.005	0.703	0.486
Cyanophora_paradoxa	Mitochondria	0.941	0.939	0.934	0.97	0.989	1.03	1.048	1.068	0.845	0.719
GCA_000383115	o__Puniceispirillales;f__AAA536-G10	0.75	0.809	0.854	0.893	0.911	0.914	0.914	0.847	0.574	0.364
GCA_000419545	o__Pelagibacterales;f__Pelagibacteraceae	0.629	0.686	0.752	0.81	0.862	0.889	0.902	0.872	0.596	0.407
GCA_000434295	o__RF32;f__CAG-977	1.113	1.038	0.984	0.934	0.904	0.861	0.814	0.745	0.432	0.19
GCA_001897445	o__Rickettsiales;f__33-17	0.748	0.793	0.829	0.864	0.892	0.89	0.886	0.876	0.589	0.38
GCA_001897795	o__UBA9655;f__UBA9655	1.049	0.98	0.926	0.892	0.866	0.831	0.801	0.745	0.476	0.257
GCA_001898425	o__Acetobacterales;f__Acetobacteraceae	1.573	1.309	1.136	1.023	0.932	0.856	0.806	0.742	0.47	0.256
GCA_002238885	o__Bin95;f__Bin95	1.749	1.487	1.29	1.146	1.031	0.946	0.884	0.835	0.574	0.353
GCA_002239065	o__Defluviicoccales;f__Defluviicoccaceae	1.884	1.51	1.275	1.128	1.028	0.94	0.884	0.799	0.564	0.349
GCA_002291925	o__Rickettsiales;f__UBA998	1.258	1.111	1.019	0.962	0.918	0.883	0.856	0.83	0.535	0.313
GCA_002352635	o__Rhizobiales;f__Methyloligellaceae	1.265	1.107	1.006	0.935	0.881	0.833	0.796	0.743	0.463	0.257
GCA_002422365	o__UBA1280;f__UBA6156	1.235	1.155	1.083	1.042	0.994	0.919	0.863	0.79	0.52	0.277
GCA_002422745	o__Rickettsiales;f__UBA3002	1.283	1.12	1.029	0.974	0.921	0.883	0.833	0.758	0.523	0.299
GCA_002436405	o__UBA1280;f__UBA6503	1.037	0.989	0.94	0.916	0.883	0.84	0.788	0.739	0.451	0.24
GCA_002632265	o__MC1;f__MC1	0.801	0.823	0.827	0.853	0.866	0.868	0.856	0.837	0.541	0.326
GCA_002690215	o__UBA2966;f__UBA2966	1.568	1.316	1.148	1.04	0.964	0.893	0.823	0.75	0.473	0.254
GCA_002691085	o__Rhodospirillales;f__Rhodospirillaceae	0.737	0.785	0.818	0.847	0.867	0.866	0.888	0.886	0.574	0.337
GCA_002696825	o__UBA8558;f__UBA8558	0.734	0.78	0.802	0.826	0.845	0.85	0.848	0.821	0.548	0.372
GCA_002700865	o__UBA7985;f__UBA7985	1.338	1.174	1.066	0.995	0.93	0.866	0.838	0.82	0.51	0.271
GCA_002746255	o__GCA-2746255;f__GCA-2746255	1.366	1.171	1.049	0.97	0.905	0.855	0.805	0.746	0.476	0.26
GCA_002753665	o__Magnetococcales;f__DC0425bin3	1.393	1.257	1.152	1.081	1.017	0.94	0.861	0.78	0.482	0.266
GCA_002787615	o__Rickettsiales;f__21-14-0-20-44-7	0.876	0.887	0.89	0.906	0.91	0.888	0.881	0.839	0.598	0.394
GCA_002787635	o__Rickettsiales;f__UBA6187	0.839	0.876	0.895	0.912	0.926	0.93	0.924	0.912	0.636	0.451
GCF_000013085	o__Rhodospirillales;f__Rhodospirillaceae	1.505	1.242	1.085	0.98	0.909	0.839	0.794	0.728	0.448	0.221
GCF_000016185	o__Azospirillales;f__Azospirillaceae	1.56	1.273	1.092	0.979	0.9	0.835	0.794	0.739	0.476	0.248
GCF_000017565	o__Parvibaculales;f__Parvibaculaceae	1.353	1.142	1.02	0.932	0.873	0.816	0.774	0.719	0.45	0.236
GCF_000022005	o__Caulobacterales;f__Caulobacteraceae	1.405	1.227	1.102	1.005	0.937	0.866	0.82	0.764	0.478	0.257
GCF_000024465	o__Puniceispirillales;f__Puniceispirillaceae	1.233	1.1	1.015	0.958	0.907	0.86	0.812	0.743	0.503	0.298
GCF_000264455	o__Tistrellales;f__Tistrellaceae	1.561	1.298	1.139	1.038	0.95	0.878	0.836	0.785	0.508	0.285
GCF_000293845	o__Parvibaculales;f__RS24	1.168	1.052	0.976	0.927	0.88	0.831	0.796	0.736	0.474	0.253
GCF_000299115	o__HIMB59;f__HIMB59	0.664	0.711	0.753	0.81	0.849	0.869	0.877	0.838	0.578	0.358
GCF_000312425	o__Reyranellales;f__Reyranellaceae	1.428	1.204	1.059	0.976	0.906	0.842	0.804	0.753	0.477	0.271
GCF_000330885	o__Rhizobiales;f__Rhizobiaceae	1.196	1.058	0.966	0.906	0.854	0.805	0.77	0.714	0.438	0.228
GCF_000348745	o__Micavibrionales;f__Micavibrionaceae	1.173	1.039	0.95	0.895	0.852	0.803	0.767	0.692	0.437	0.229
GCF_000374005	o__Kiloniellales;f__Kiloniellaceae	1.2	1.05	0.956	0.896	0.846	0.8	0.773	0.718	0.442	0.232
GCF_000374145	o__Rhodobacterales;f__Neomegalonemataceae	1.528	1.309	1.159	1.059	0.973	0.898	0.84	0.772	0.49	0.267
GCF_000375545	o__Sphingomonadales;f__Kordiimonadaceae	1.218	1.081	0.993	0.928	0.874	0.828	0.793	0.743	0.463	0.249
GCF_000412185	o__Caulobacterales;f__Maricaulaceae	1.345	1.183	1.071	0.991	0.926	0.863	0.808	0.738	0.467	0.256
GCF_000423185	o__Azospirillales;f__Inquilinaceae	1.57	1.293	1.104	0.993	0.912	0.844	0.8	0.75	0.482	0.262
GCF_000426505	o__Thalassobaculales;f__Nisaeaceae	1.281	1.089	0.971	0.905	0.849	0.798	0.763	0.704	0.432	0.232
GCF_000427665	o__Geminicoccales;f__Geminicoccaceae	1.461	1.25	1.111	1.018	0.954	0.881	0.828	0.764	0.483	0.277
GCF_000496075	o__Rhizobiales;f__Tepidamorphaceae	1.432	1.209	1.072	0.984	0.915	0.849	0.808	0.757	0.479	0.269
GCF_000506965	o__Rhodobacterales;f__Rhodobacteraceae	1.364	1.194	1.07	0.982	0.912	0.859	0.806	0.741	0.437	0.214
GCF_000513295	o__Rhodospirillales;f__Magnetospirillaceae	1.365	1.151	1.015	0.94	0.869	0.812	0.775	0.721	0.453	0.235
GCF_000515255	o__Kiloniellales;f__Rhodovibrionaceae	1.406	1.188	1.054	0.961	0.891	0.829	0.794	0.742	0.465	0.251
GCF_000518365	o__ATCC43930;f__Stellaceae	1.503	1.232	1.066	0.966	0.889	0.83	0.786	0.726	0.462	0.251
GCF_000616095	o__Sneathiellales;f__Sneathiellaceae	1.114	1.008	0.927	0.88	0.839	0.79	0.76	0.71	0.448	0.239
GCF_000620685	o__Dongiales;f__Dongiaceae	1.337	1.132	0.996	0.922	0.861	0.807	0.77	0.717	0.447	0.232
GCF_000688235	o__Rhodospirillales;f__Terasakiellaceae	1.113	0.992	0.915	0.868	0.833	0.791	0.759	0.702	0.429	0.221
GCF_000745835	o__Acetobacterales;f__Acetobacteraceae	1.663	1.388	1.2	1.068	0.972	0.885	0.832	0.762	0.485	0.271
GCF_000746585	o__Rickettsiales;f__Arcanobacteraceae	0.731	0.781	0.814	0.858	0.885	0.886	0.898	0.868	0.591	0.399
GCF_000757605	o__Paracaedibacterales;f__Paracaedibacteraceae	1.02	0.959	0.916	0.892	0.865	0.846	0.817	0.757	0.488	0.269
GCF_000815465	o__Rickettsiales;f__Midichloriaceae	0.759	0.803	0.84	0.876	0.894	0.91	0.914	0.886	0.587	0.387
GCF_001179965	o__Pelagibacterales;f__Pelagibacteraceae	0.623	0.7	0.765	0.826	0.886	0.932	0.937	0.929	0.624	0.411
GCF_001499675	o__Acetobacterales;f__Acetobacteraceae	1.478	1.283	1.155	1.059	0.978	0.916	0.853	0.778	0.501	0.269
GCF_001618175	o__Oceanibaculales;f__Oceanibaculaceae	1.407	1.159	1.015	0.926	0.861	0.801	0.763	0.718	0.428	0.212
GCF_001746755	o__Rhodospirillales;f__Magnetovibrionaceae	1.245	1.074	0.968	0.906	0.855	0.816	0.792	0.752	0.465	0.234
GCF_001983425	o__Rhodospirillales;f__Thalassospiraceae	1.171	1.02	0.933	0.881	0.832	0.791	0.764	0.708	0.438	0.231
GCF_002109495	o__Magnetococcales;f__Magnetococcaceae	1.213	1.111	1.033	0.993	0.956	0.905	0.838	0.754	0.452	0.25
GCF_002117145	o__Caedimonadales;f__Nucleicultricaceae	0.942	0.937	0.926	0.919	0.907	0.891	0.869	0.82	0.568	0.337
GCF_002251735	o__Elsterales;f__Elsteraceae	1.444	1.22	1.072	0.981	0.903	0.835	0.795	0.747	0.485	0.259
GCF_002259525	o__Rickettsiales;f__Rickettsiaceae	0.711	0.748	0.786	0.834	0.88	0.915	0.931	0.915	0.638	0.436
GCF_002688585	o__Pelagibacterales;f__Pelagibacteraceae	0.626	0.691	0.756	0.814	0.863	0.883	0.884	0.849	0.578	0.385
GCF_900172325	o__Sneathiellales;f__Sneathiellaceae	1.485	1.24	1.074	0.983	0.91	0.848	0.81	0.756	0.49	0.259
GCF_900177515	o__Azospirillales;f__Azospirillaceae	1.402	1.165	1.018	0.934	0.871	0.81	0.774	0.714	0.443	0.227
Klebsormidium_sp	Mitochondria	1.104	1.044	1	0.996	0.981	0.975	0.975	0.986	0.713	0.502
Malawimonas_249	Mitochondria	0.973	0.972	0.975	1.009	1.031	1.075	1.114	1.136	0.882	0.688
MarineAlpha10_Bin2_PTKB	o__UBA828;f__UBA828	1.431	1.188	1.04	0.952	0.887	0.837	0.813	0.78	0.467	0.277
MarineAlpha4_Bin1_PTLF	o__UBA8366;f__GCA-2717185	1.411	1.159	1.01	0.918	0.851	0.798	0.753	0.688	0.431	0.237
MarineAlpha5_Bin12_PTKS	o__HIMB59;f__GCA-002718135	0.558	0.617	0.674	0.74	0.783	0.807	0.815	0.764	0.467	0.248
MarineAlpha6_Bin2_PTKQ	o__GCA-002720895;f__GCA-002720895	0.535	0.59	0.646	0.706	0.742	0.779	0.798	0.844	0.432	0.257
Nitella_sp	Mitochondria	1.013	0.97	0.943	0.951	0.941	0.94	0.935	0.938	0.645	0.433
Palpitomonas_bilix	Mitochondria	0.928	0.951	0.968	1.011	1.039	1.052	1.092	1.113	0.858	0.683
Phytophthora_infestans	Mitochondria	0.869	0.876	0.891	0.938	0.983	1.017	1.067	1.097	0.809	0.615
Reclinomonas_americana	Mitochondria	0.755	0.776	0.791	0.843	0.882	0.938	0.972	0.993	0.759	0.594
Seculamonas_ecuadoriensis	Mitochondria	0.855	0.864	0.874	0.919	0.953	0.995	1.009	1.03	0.805	0.598
TARA_ANE_MAG_00011	o__Rickettsiales;f__	0.946	0.957	0.949	0.955	0.961	0.938	0.915	0.876	0.613	0.416
TARA_ANE_MAG_00016	o__GCA-2701885;f__GCA-2701885	0.757	0.812	0.842	0.879	0.9	0.902	0.891	0.854	0.587	0.364
TARA_ANW_MAG_00004	o__Sphingomonadales;f__Emcibacteraceae	1.186	1.036	0.953	0.902	0.851	0.81	0.779	0.73	0.451	0.232
TARA_ION_MAG_00022	o__TMED127;f__TMED127	0.582	0.645	0.704	0.776	0.833	0.87	0.898	0.907	0.584	0.396
TARA_MED_MAG_00116	o__TMED127;f__TMED127	0.609	0.663	0.713	0.775	0.819	0.84	0.85	0.853	0.515	0.345
TARA_PSE_MAG_00017	o__Rhizobiales_B;f__TMED25	0.73	0.766	0.791	0.812	0.821	0.815	0.8	0.767	0.491	0.274
TARA_PSE_MAG_00045	o__Rickettsiales;f__UBA3002	1.074	0.999	0.941	0.905	0.876	0.848	0.821	0.758	0.485	0.307
TARA_PSE_MAG_00063	o__TMED109;f__TMED131	0.649	0.706	0.761	0.814	0.856	0.889	0.906	0.827	0.585	0.39
TARA_PSW_MAG_00020	o__Ferrovibrionales;f__	1.524	1.263	1.089	0.993	0.92	0.86	0.821	0.774	0.496	0.27
TARA_PSW_MAG_00024	o__UBA1280;f__	1.029	0.987	0.949	0.929	0.894	0.84	0.8	0.726	0.436	0.234
TARA_PSW_MAG_00046	o__UBA7887;f__GCA-2721365	1.525	1.263	1.1	0.997	0.916	0.863	0.828	0.797	0.517	0.294
TOBG_ARS_27	o__UBA11136;f__UBA11136	1.317	1.116	0.995	0.927	0.869	0.814	0.774	0.726	0.458	0.263
TOBG_CPC_30	o__Puniceispirillales;f__GCA-002684695	0.733	0.772	0.81	0.842	0.854	0.853	0.84	0.786	0.534	0.331
TOBG_MED_717	o__Puniceispirillales;f__UBA1172	1.303	1.149	1.047	0.979	0.928	0.872	0.832	0.765	0.497	0.285
TOBG_MED_792	o__Rhodobacterales;f__UBA8317	1.215	1.11	1.03	0.968	0.917	0.866	0.827	0.77	0.496	0.254
TOBG_MED_801	o__Rhizobiales_B;f__TMED25	0.747	0.806	0.853	0.892	0.924	0.931	0.929	0.848	0.565	0.351
TOBG_SAT_136	o__TMED109;f__TMED109	0.72	0.766	0.794	0.84	0.857	0.849	0.824	0.836	0.518	0.344
TOBG_SAT_9	o__UBA8366;f__GCA-2696645	1.263	1.084	0.974	0.91	0.85	0.797	0.767	0.721	0.447	0.226
TOBG_SP_197	o__SP197;f__SP197	1.389	1.187	1.054	0.968	0.903	0.847	0.808	0.765	0.484	0.261
TOBG_SP_279	o__GCA-2701885;f__GCA-2701885	0.731	0.783	0.823	0.868	0.895	0.898	0.888	0.848	0.57	0.354
TOBG_SP_3	o__Defluviicoccales;f__UBA2964	1.238	1.083	0.989	0.926	0.87	0.818	0.787	0.726	0.471	0.252
UBA10963	o__UBA11222;f__UBA11222	1.365	1.152	1.022	0.93	0.867	0.804	0.771	0.731	0.47	0.253
UBA11222	o__UBA11222;f__UBA11222	1.392	1.157	1.023	0.935	0.865	0.803	0.756	0.715	0.463	0.263
Alphaproteobacterium_ALCH-30	o__UBA6615;f__	1.629	1.338	1.137	1.016	0.925	0.853	0.808	0.766	0.502	0.253
Alphaproteobacterium_ALCH-33_01	o__Kiloniellales;f__	1.572	1.261	1.066	0.955	0.867	0.797	0.742	0.709	0.462	0.242
Alphaproteobacterium_ALG-ZAB-024	o__Acetobacterales;f__Acetobacteraceae	1.876	1.517	1.259	1.098	0.961	0.865	0.817	0.775	0.505	0.287
Alphaproteobacterium_ALG-ZAB-270	o__Geminicoccales;f__Geminicoccaceae	1.756	1.454	1.23	1.074	0.965	0.867	0.795	0.754	0.466	0.279
Alphaproteobacterium_BAIK-034	o__Dongiales;f__	1.65	1.333	1.135	1.012	0.916	0.849	0.815	0.76	0.512	0.272
Alphaproteobacterium_CHIP-028	o__Kiloniellales;f__Rhodovibrionaceae	1.324	1.112	0.99	0.906	0.837	0.786	0.751	0.721	0.445	0.231
Alphaproteobacterium_LLAM-11	o__UBA1280;f__	1.127	1.076	1.019	0.989	0.942	0.887	0.829	0.785	0.472	0.248
Alphaproteobacterium_LLAM-13	o__Rickettsiales;f__UBA8987	1.007	0.951	0.917	0.9	0.883	0.861	0.838	0.798	0.518	0.326
Alphaproteobacterium_LLAM-14	o__Rickettsiales;f__	1.164	1.055	0.984	0.937	0.899	0.854	0.826	0.774	0.508	0.297
Alphaproteobacterium_LLAM-18	o__Caulobacterales;f__Parvularculaceae	1.225	1.095	1.006	0.941	0.886	0.849	0.813	0.78	0.475	0.23
Alphaproteobacterium_LLAM-32	o__Bin65;f__	1.691	1.379	1.18	1.055	0.965	0.905	0.876	0.838	0.567	0.335
Alphaproteobacterium_LLAM-42	o__Sphingomonadales;f__	1.484	1.254	1.097	0.997	0.925	0.864	0.816	0.773	0.496	0.278
RANGE		1.349	0.927	0.644	0.44	0.323	0.296	0.372	0.448	0.454	0.529
