# Supplementary material for: A site-and-branch-heterogeneous model on an expanded dataset favor mitochondria as sister to known Alphaproteobacteria
Source: Research Square preprint supplement (doi:10.21203/rs.3.rs-557223/v1), 2021-05-28
Supplement: Supplementary file 2 [file 26000fbd6d79fd3ed9117cb5.docx]

**Supplementary Material**

**Figure S1**. Euler diagram that shows the relationships between recent phylogenomic sets of proteins used to address the phylogenetic placement of mitochondria. Data sets include those comprised by mitochondrion- and nucleus-encoded proteins in this study, Wang and Wu (2015), and Martijn et al. (2018).

**Figure S2**. Summary of genome features for novel MAGs for MarineProteo1 and the *Rickettsiales*. The *Magnetococcia* is at the base of the tree as an outgroup. pHMM searches were done using hmmsearch of the HMMER suite and the Pfam pHMM for Mic60 (Mitofilin; PF09731) and 17 custom pHMMs for bacteriochlorophyll biosynthesis enzymes.

**Figure S3**. Variation in support values for the placement of mitochondria outside of the *Alphaproteobacteria* (SH-aLRT and UFBoot2+NNI) throughout the progressive removal of compositionally heterogenous sites according to the ɀ and *χ*2. Support for the branch that groups mitochondria with all alphaproteobacteria (but excludes MarineProteo1 and the *Magnetococcia*) is always maximal (i.e., 100% SH-aLRT /100% UFBoot2+NNI). (**A**) Nucleus-encoded protein data set. (**B**) Mitochondrion-encoded protein data set.

**Figure S4**. Schematic tree topologies used for the likelihood calculations using the MAM60+GFmix model. Tree topologies derived from analyses of the untreated data set of mitochondrion-, and nucleus-encoded proteins (**A**), and a compositionally homogenized data set through the removal of 50% ɀ sites (**B**). Tree topologies derived from analyses of the untreated data set of nucleus-encoded proteins (**C**), and a compositionally homogenized data set through the removal of 50% ɀ sites (**D**). Tree topologies derived from analyses of the untreated data set of mitochondrion-encoded proteins (**E**), and a compositionally homogenized data set through the removal of 50% ɀ sites (**F**).

**Figure S5**. UPGMAs dendrograms for G A R P/F I M N K Y distances among the marker proteins of alphaproteobacterial origin in eukaryotes used in this study. (**A**) Mitochondrion- and nucleus-encoded genes. (**B**) Mitochondrion-encoded genes. (**C**). Nucleus-encoded genes.

**Table S1**. Gene names, cellular compartment where genes are encoded, and functional annotations for the 108 mitochondrial proteins of alphaproteobacterial origin in eukaryotes.

**Table S2**. Microbial mat and sediment metagenomes from which alphaproteobacterial MAGs were assembled in this study.

**Table S3**. Summary of major features for each of the 154 alphaproteobacterial MAGs reconstructed from diverse metagenomes sequenced in this study. pHMM searches were done using hmmsearch of the HMMER suite and a set of 17 custom pHMMs for bacteriochlorophyll biosynthesis enzymes.

**Table S4**. Summary of major features for genomes and MAGs that belong to the *Magnetococcia*, MarineProteo1 clade, and *Rickettsiales*. The dashed rectangle points to the secondary higher G+C content of the genera *Anaplasma* and *Neorickettsia* in the family *Anaplasmataceae*.

**Table S5**. G A R P/F I M N K Y ratios across taxa as compositionally heterogeneous sites are removed according to the ɀ metric. The range of G A R P/F I M N K Y ratios across taxa is minimized after the removal of the 50% most compositionally biased ɀ sites.

**Table S6**. (**A**) Analyses on the untreated data set of mitochondrion- and nucleus-encoded proteins (116 taxa and 108 proteins) using the MAM60+GFmix model. (**B**). Analyses on the untreated data set of nucleus-encoded proteins (116 taxa and 64 proteins) using the MAM60+GFmix model. (**C**) Analyses on the untreated data set of mitochondrion-encoded proteins (116 taxa and 44 proteins) using the MAM60+GFmix model.

**Table S7**. Eukaryotes used in this study for which both nuclear and mitochondrial genomes are available. The eukaryotic species *Nitella* sp. and *Malawimonas* sp. are synthetic chimeras whose nuclear and mitochondrial predicted proteomes come from different species within the genus.

**Figure S1.**

**
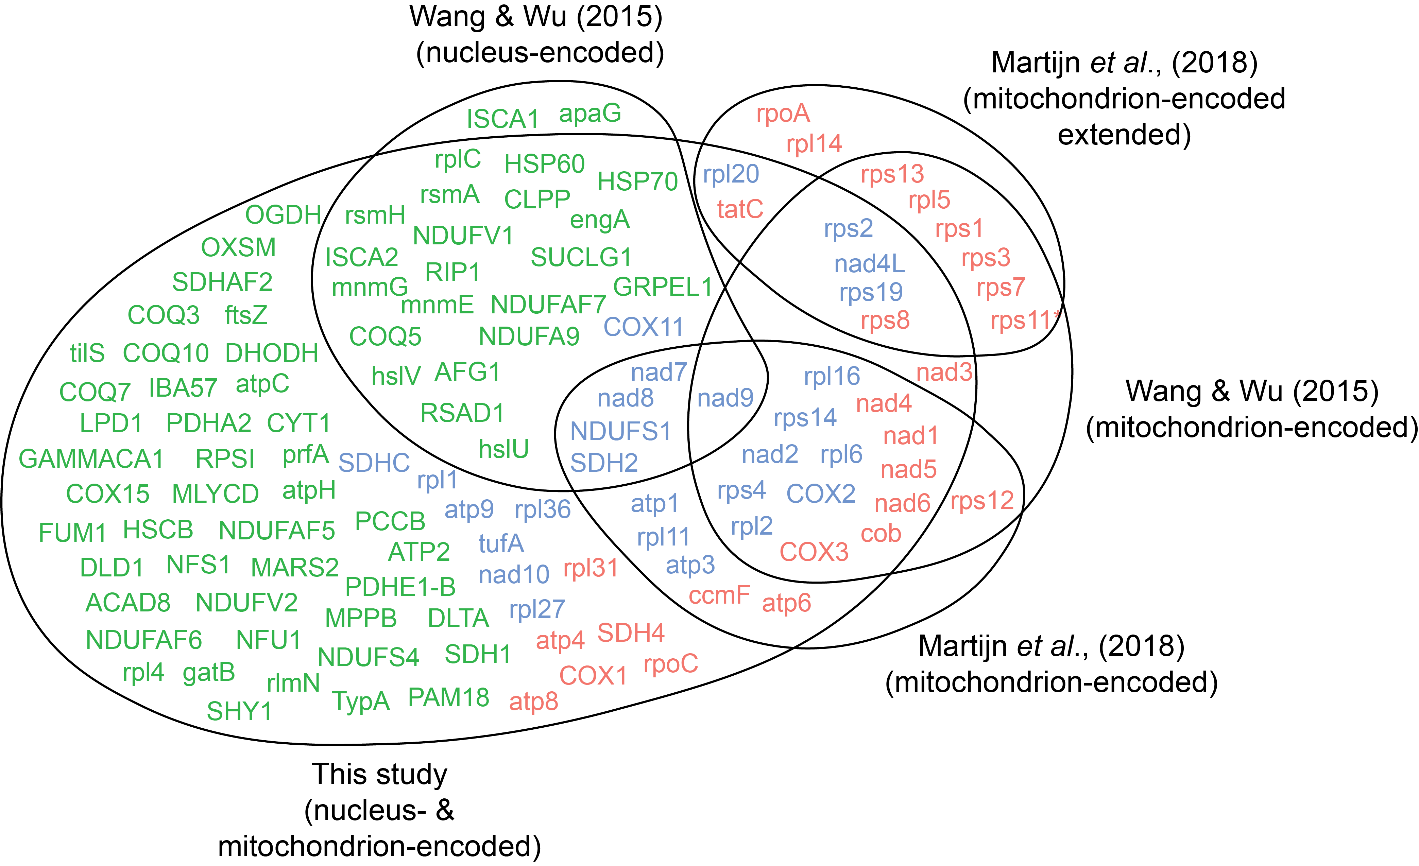
**

**Figure S2.**

**
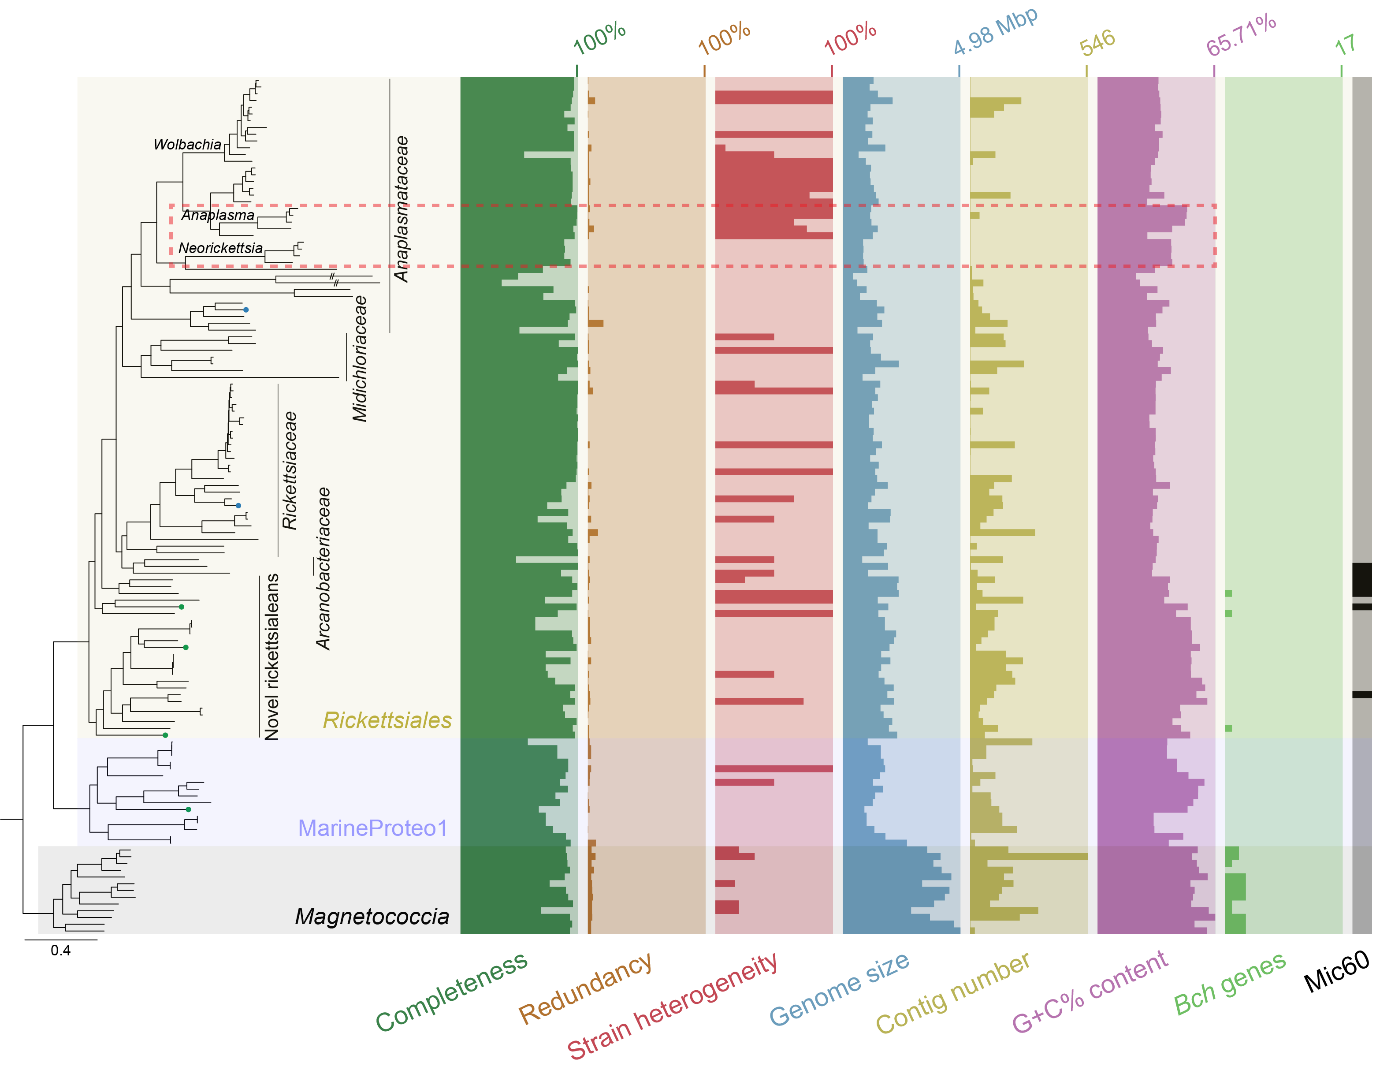
**

**Figure S3.**

**
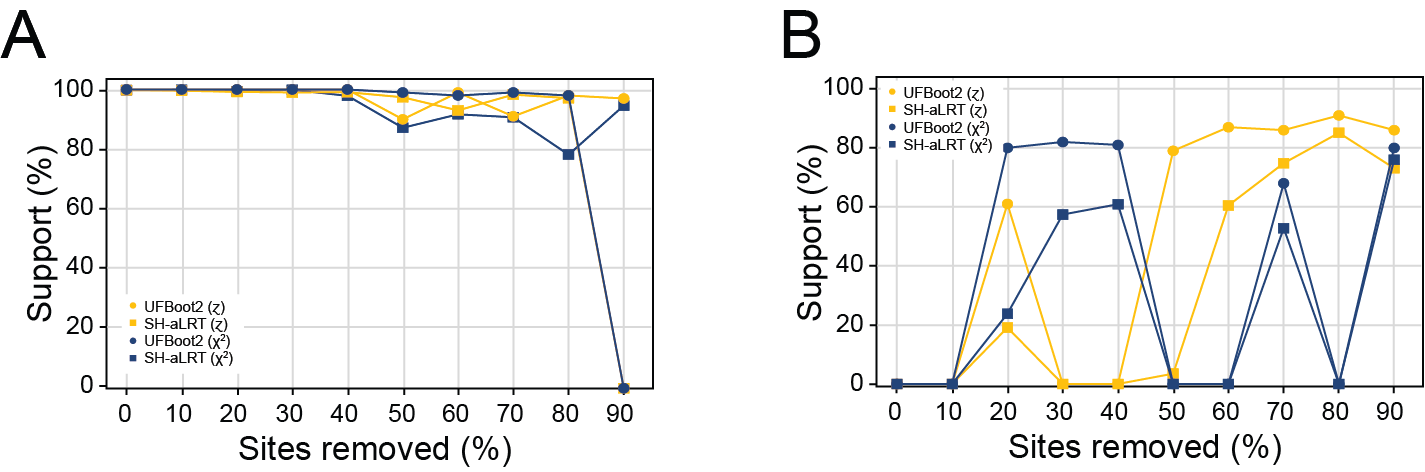
**

**Figure S4.**

**
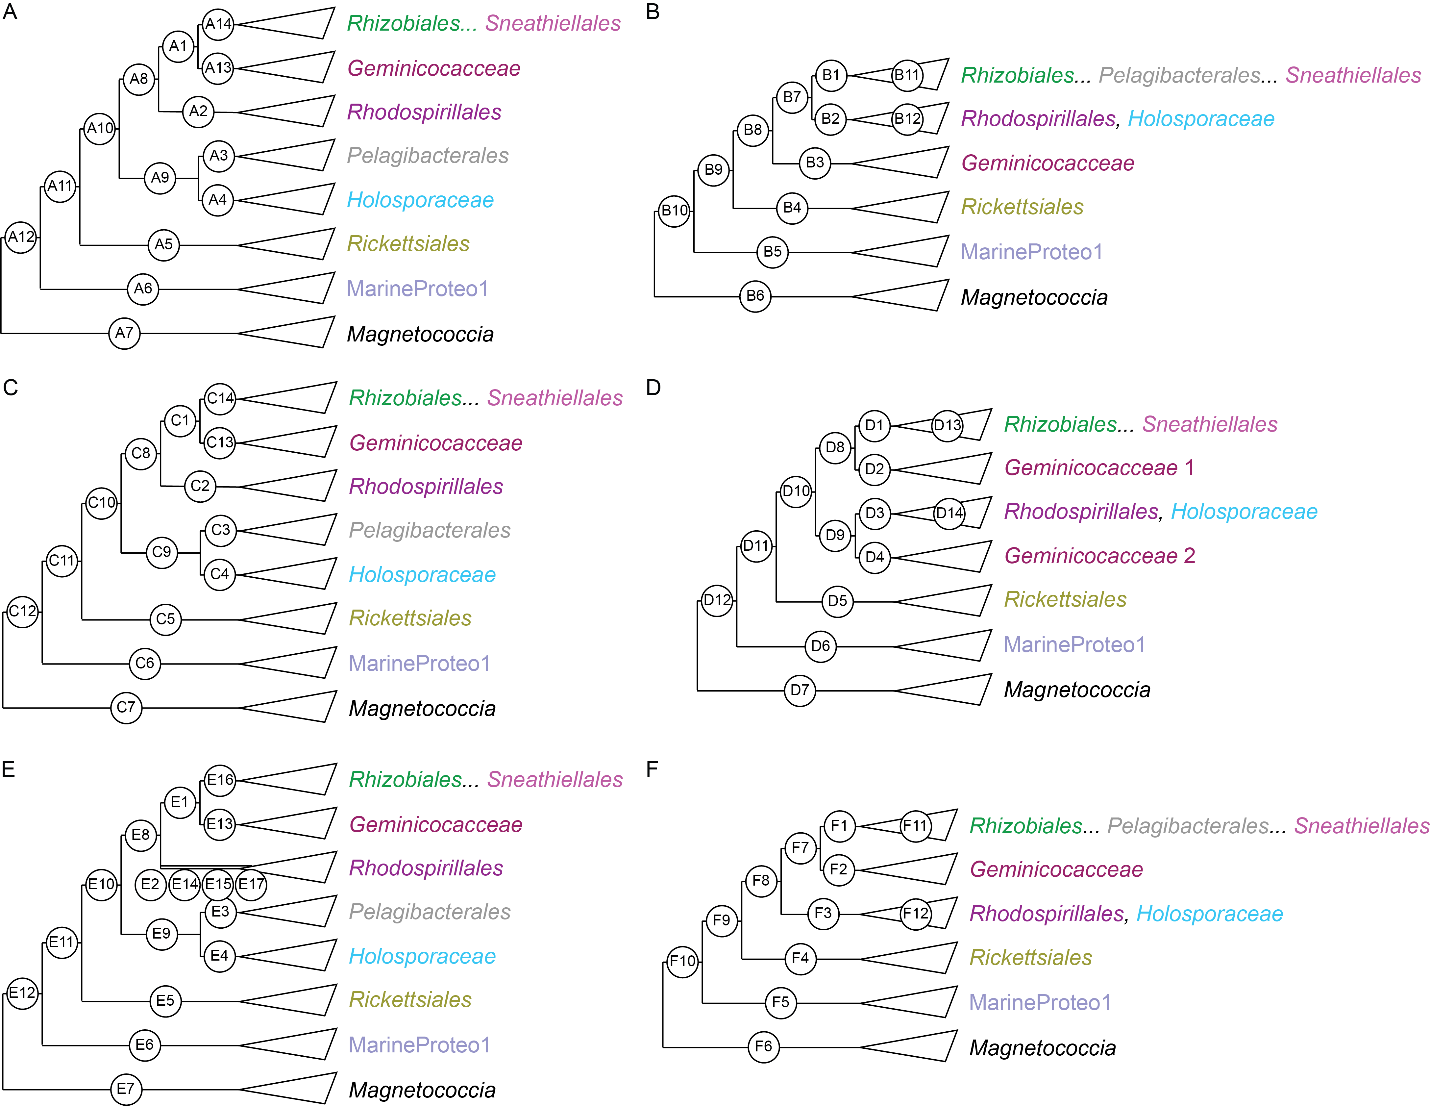
**

**Figure S5.**

**
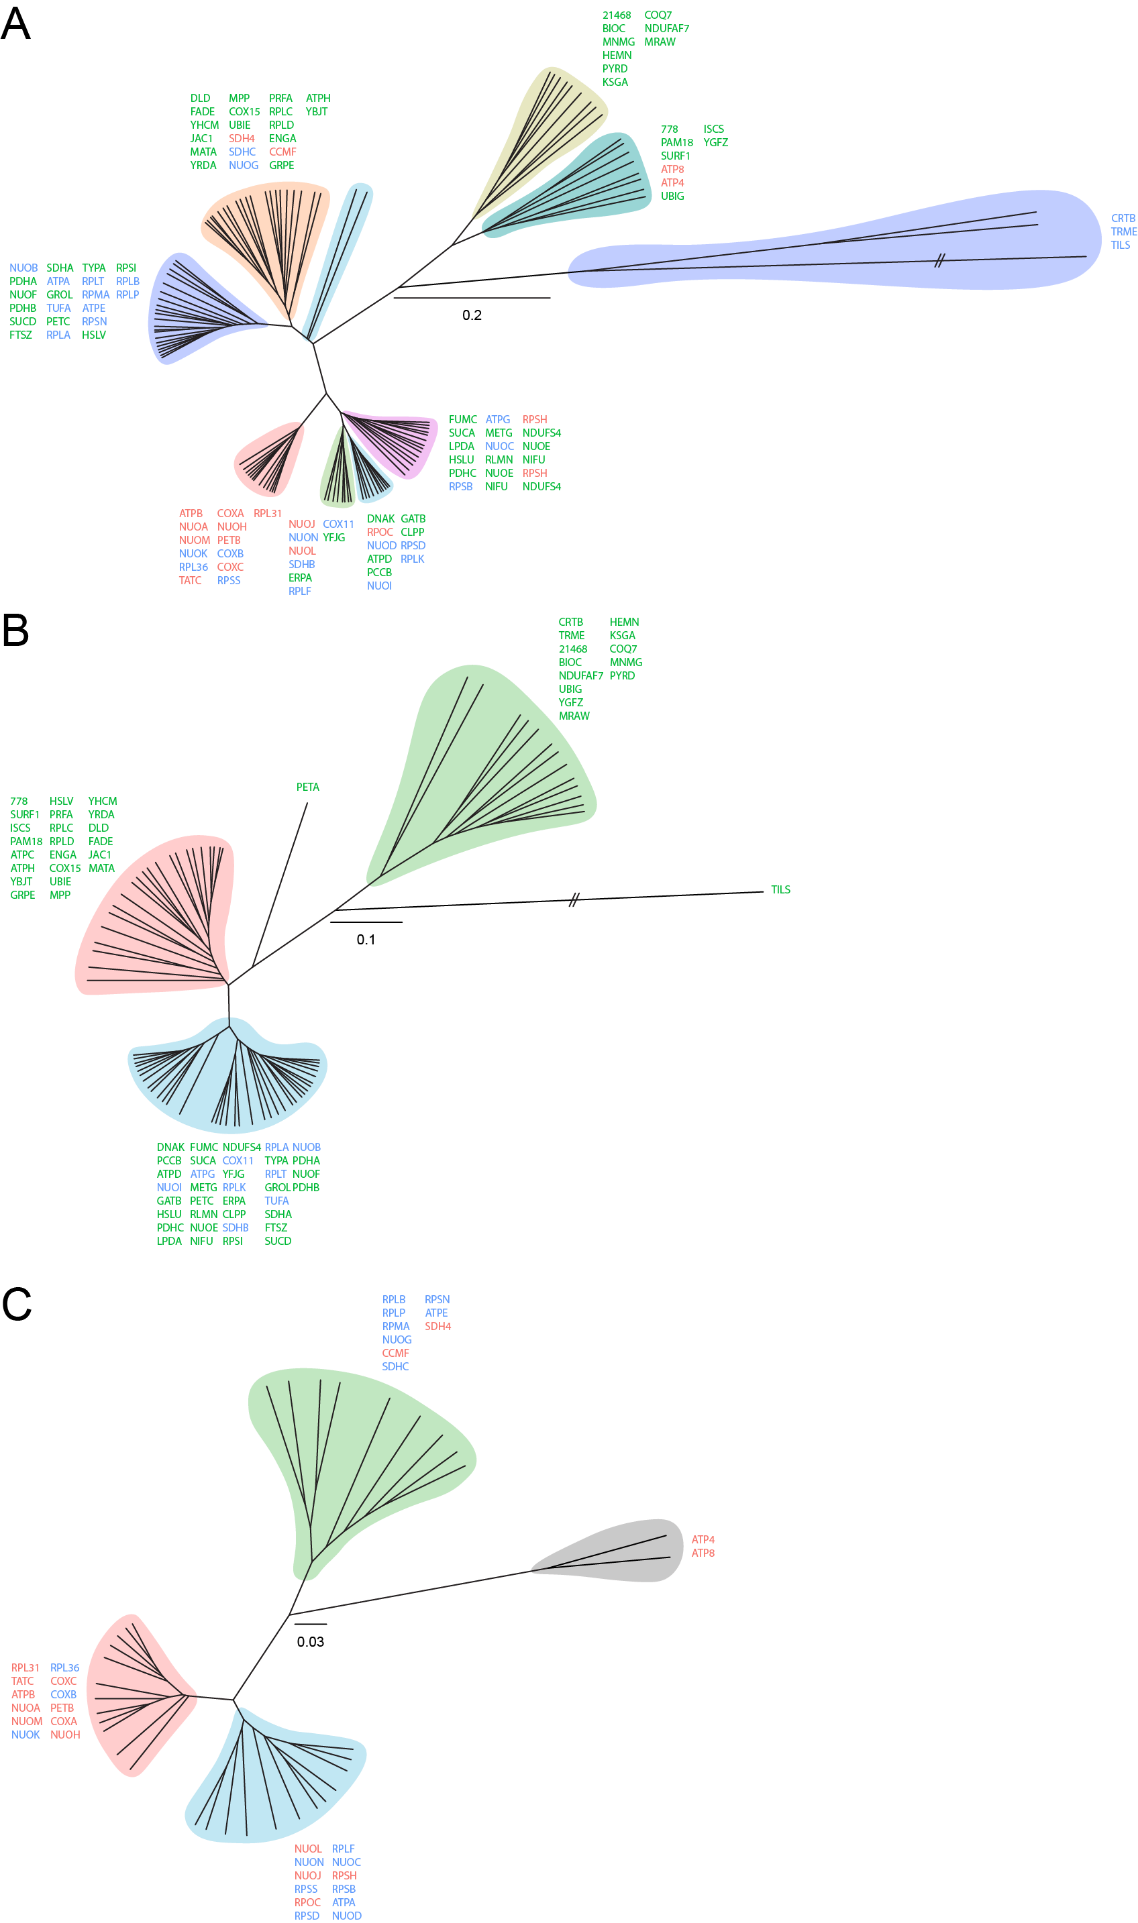
**
