# Supplementary material for: A site-and-branch-heterogeneous model on an expanded dataset favor mitochondria as sister to known Alphaproteobacteria
Source: Research Square preprint supplement (doi:10.21203/rs.3.rs-557223/v1), 2021-05-28
Supplement: Supplementary file 5 [file 755a3726ea75ac962b53b659.xlsx]

## Sheet: Table S6A
Table S6A. Analyses on the untreated data set of mitochondrion- and nucleus-encoded proteins (116 taxa and 108 proteins) using the MAM60+GFmix model. Toplogy name (Top.); Natural logarithm of likelihood (lnL); Likelihood Ratio Test (LRT); Chi-square P-value (P-value 1); Bonferroni-corrected P-value (P-value 2); Number of splits requried to make tree compatible with Maximum-Likelihood tree (Splits…
IQ-TREE (p1)							GARP-mix (p1)							IQ-TREE (p1-10)							GARP-mix (p1-10)
Top.	lnL	LRT	P-value 1	P-value 2	Splits	Trees	Top.	lnL	LRT	P-value 1	P-value 2	Splits	Trees	Top.	lnL	LRT	P-value 1	P-value 2	Splits	Trees	Top.	lnL	LRT	P-value 1	P-value 2	Splits	Trees
D13	-3.00408e+06	4845.85	0	0	48	21	E12	-2.98403e+06	3637.39	0	0	40	7	D13	-2.99132e+06	4537.51	0	0	48	21	E7	-2.9665e+06	4438.5	0	0	40	7
D7	-3.004e+06	4693.49	0	0	47	7	E7	-2.98403e+06	3637.39	0	0	40	7	D12	-2.99122e+06	4340.35	0	0	47	7	E12	-2.9665e+06	4438.36	0	0	40	7
D12	-3.004e+06	4693.49	0	0	47	7	E6	-2.98403e+06	3633.99	0	0	40	7	D7	-2.99122e+06	4340.35	0	0	47	7	E6	-2.96649e+06	4433.25	0	0	40	7
D6	-3.004e+06	4690.7	0	0	47	7	D13	-2.98402e+06	3621.42	0	0	41	17	D6	-2.99122e+06	4334.06	0	0	47	7	D13	-2.96625e+06	3951.48	0	0	41	17
F11	-3.00354e+06	3758.96	0	0	36	19	D12	-2.98394e+06	3449.89	0	0	36	7	D14	-2.99068e+06	3260.27	0	0	48	21	D12	-2.96614e+06	3733.51	0	0	36	7
F6	-3.00346e+06	3594.64	0	0	35	7	D7	-2.98394e+06	3449.89	0	0	36	7	E12	-2.99065e+06	3191.46	0	0	25	7	D7	-2.96614e+06	3733.5	0	0	36	7
F10	-3.00346e+06	3594.64	0	0	35	7	D6	-2.98394e+06	3447.17	0	0	36	7	E7	-2.99065e+06	3191.46	0	0	25	7	D6	-2.96614e+06	3726.71	0	0	36	7
F5	-3.00345e+06	3591.85	0	0	35	7	F11	-2.98362e+06	2809.3	0	0	29	17	E6	-2.99064e+06	3181.49	0	0	25	7	E15	-2.96604e+06	3527.62	0	0	41	22
D14	-3.00345e+06	3591.39	0	0	48	21	F10	-2.98352e+06	2625.38	0	0	24	7	F11	-2.99064e+06	3176.06	0	0	36	19	E14	-2.96599e+06	3434.48	0	0	41	22
D2	-3.00331e+06	3298.9	0	0	48	21	F6	-2.98352e+06	2625.38	0	0	24	7	D2	-2.99055e+06	3006.83	0	0	48	21	E16	-2.96598e+06	3395.49	0	0	41	22
D3	-3.0033e+06	3292.5	0	0	48	21	F5	-2.98352e+06	2620.34	0	0	24	7	D1	-2.99055e+06	3004.78	0	0	48	21	E17	-2.96597e+06	3383.29	0	0	41	22
D1	-3.0033e+06	3278.09	0	0	48	21	E15	-2.98349e+06	2556.07	0	0	41	22	D3	-2.99055e+06	3001.96	0	0	48	21	E1	-2.96597e+06	3383.29	0	0	41	22
D4	-3.00329e+06	3271.88	0	0	48	21	E14	-2.98345e+06	2466.6	0	0	41	22	D8	-2.99055e+06	2990.98	0	0	48	21	E13	-2.96597e+06	3382.97	0	0	41	22
D8	-3.00329e+06	3267.78	0	0	48	21	E16	-2.98343e+06	2427.07	0	0	41	22	D4	-2.99054e+06	2985.69	0	0	48	21	E2	-2.96592e+06	3287.35	0	0	41	22
E7	-3.00329e+06	3263.74	0	0	25	7	E1	-2.98342e+06	2417.14	0	0	41	22	D9	-2.99054e+06	2979.66	0	0	48	21	E3	-2.96584e+06	3129.72	0	0	41	22
E12	-3.00329e+06	3263.74	0	0	25	7	E17	-2.98342e+06	2417.14	0	0	41	22	F10	-2.99054e+06	2979.17	0	0	35	7	E9	-2.96584e+06	3118.37	0	0	41	22
D9	-3.00329e+06	3260.92	0	0	48	21	E13	-2.98342e+06	2409.29	0	0	41	22	F6	-2.99054e+06	2979.17	0	0	35	7	E4	-2.96583e+06	3110.89	0	0	41	22
E6	-3.00329e+06	3260.64	0	0	25	7	E2	-2.98339e+06	2355.51	0	0	41	22	F5	-2.99054e+06	2971.8	0	0	35	7	E8	-2.96582e+06	3088.72	0	0	41	22
B11	-3.0032e+06	3081.67	0	0	33	19	D14	-2.98339e+06	2354.91	0	0	38	17	D5	-2.99042e+06	2742.88	0	0	47	5	C12	-2.96575e+06	2940.13	0	0	43	7
D5	-3.00319e+06	3058.85	0	0	47	5	E3	-2.98335e+06	2276.07	0	0	41	22	D10	-2.99042e+06	2731.53	0	0	47	5	C7	-2.96575e+06	2939.82	0	0	43	7
D10	-3.00318e+06	3051.6	0	0	47	5	E4	-2.98334e+06	2254.84	0	0	41	22	D11	-2.99038e+06	2656.55	0	0	46	1	C6	-2.96574e+06	2928.08	0	0	43	7
D11	-3.00316e+06	3003.48	0	0	46	1	E9	-2.98334e+06	2249.09	0	0	41	22	B11	-2.99028e+06	2453.41	0	0	33	19	E5	-2.96573e+06	2911.42	0	0	40	5
B10	-3.00313e+06	2940.71	0	0	32	7	E8	-2.98332e+06	2212.45	0	0	41	22	C7	-2.99024e+06	2376.14	0	0	34	7	E10	-2.96572e+06	2891.28	0	0	40	5
B6	-3.00313e+06	2940.71	0	0	32	7	C12	-2.98326e+06	2096.4	0	0	43	7	C12	-2.99024e+06	2376.14	0	0	34	7	F11	-2.96568e+06	2806.97	0	0	29	17
B5	-3.00313e+06	2937.5	0	0	32	7	C7	-2.98326e+06	2096.4	0	0	43	7	C6	-2.99024e+06	2370.58	0	0	34	7	E11	-2.96568e+06	2802.23	0	0	39	1
F12	-3.00293e+06	2544.4	0	0	36	19	C6	-2.98326e+06	2090.59	0	0	43	7	B10	-2.99019e+06	2272.88	0	0	32	7	A7	-2.96566e+06	2766.55	0	0	32	7
C7	-3.00279e+06	2254.77	0	0	34	7	D2	-2.98326e+06	2086.17	0	0	37	15	B6	-2.99019e+06	2272.88	0	0	32	7	A12	-2.96566e+06	2764.61	0	0	32	7
C12	-3.00279e+06	2254.77	0	0	34	7	D3	-2.98325e+06	2072.74	0	0	37	15	B5	-2.99018e+06	2264.31	0	0	32	7	A6	-2.96566e+06	2762.5	0	0	32	7
C6	-3.00278e+06	2252.5	0	0	34	7	D1	-2.98324e+06	2062.07	0	0	37	15	E15	-2.99016e+06	2216.26	0	0	26	20	D14	-2.96561e+06	2662.04	0	0	38	17
F2	-3.00276e+06	2212.2	0	0	36	19	E5	-2.98324e+06	2060.56	0	0	40	5	E14	-2.9901e+06	2090.18	0	0	26	20	F6	-2.96557e+06	2586.68	0	0	24	7
F1	-3.00276e+06	2211.28	0	0	36	19	D4	-2.98324e+06	2055.86	0	0	37	15	E16	-2.99009e+06	2085.61	0	0	27	24	F10	-2.96557e+06	2586.4	0	0	24	7
F3	-3.00276e+06	2208.71	0	0	36	19	D8	-2.98324e+06	2053.09	0	0	37	15	E13	-2.99009e+06	2079.66	0	0	27	24	F5	-2.96556e+06	2574.62	0	0	24	7
F7	-3.00276e+06	2198.01	0	0	36	19	E10	-2.98324e+06	2050.79	0	0	40	5	E1	-2.99009e+06	2076.59	0	0	26	20	D2	-2.9655e+06	2436.23	0	0	37	15
E15	-3.00274e+06	2166.99	0	0	26	20	D9	-2.98323e+06	2042.19	0	0	37	15	E17	-2.99009e+06	2076.59	0	0	26	20	D1	-2.96549e+06	2431.61	0	0	37	15
E14	-3.00269e+06	2067.29	0	0	26	20	E11	-2.98321e+06	1994.59	0	0	39	1	E2	-2.99002e+06	1946.68	0	0	26	20	D8	-2.96549e+06	2419.76	0	0	37	15
E16	-3.00268e+06	2039.56	0	0	27	24	A12	-2.98317e+06	1911.21	0	0	32	7	F12	-2.99002e+06	1944.93	0	0	36	19	D3	-2.96549e+06	2416.27	0	0	37	15
E1	-3.00267e+06	2027.42	0	0	26	20	A7	-2.98317e+06	1911.21	0	0	32	7	E3	-2.98997e+06	1849.32	0	0	26	20	D9	-2.96548e+06	2410.23	0	0	37	15
E17	-3.00267e+06	2027.42	0	0	26	20	A6	-2.98317e+06	1908.03	0	0	32	7	E4	-2.98997e+06	1845.27	0	0	26	20	D4	-2.96548e+06	2403.92	0	0	37	15
E13	-3.00267e+06	2020.02	0	0	27	24	D5	-2.98314e+06	1846.59	0	0	36	5	E9	-2.98996e+06	1810.28	0	0	26	20	D5	-2.96536e+06	2154.96	0	0	36	5
F4	-3.00265e+06	1973.76	0	0	35	5	B11	-2.98313e+06	1845.4	0	0	7	7	E8	-2.98992e+06	1736.95	0	0	26	20	D10	-2.96535e+06	2140.65	0	0	36	5
F8	-3.00264e+06	1956.98	0	0	35	5	D10	-2.98313e+06	1839.41	0	0	36	5	F3	-2.98989e+06	1682.67	0	0	36	19	D11	-2.9653e+06	2046.03	0	0	35	1
E2	-3.00263e+06	1943.03	0	0	26	20	D11	-2.9831e+06	1782.24	0	0	35	1	F1	-2.98989e+06	1677.16	0	0	36	19	B11	-2.96522e+06	1893.25	0	0	7	7
F9	-3.00261e+06	1907.33	0	0	34	1	B10	-2.98304e+06	1659.4	0	0	1	3	F2	-2.98989e+06	1673.95	0	0	36	19	C2	-2.96517e+06	1775.87	0	0	44	19
B12	-3.0026e+06	1889.62	0	0	33	19	B6	-2.98304e+06	1659.4	0	0	1	3	A12	-2.98988e+06	1668.15	0	0	1	3	C14	-2.96516e+06	1768.18	0	0	44	19
E3	-3.00259e+06	1867.12	0	0	26	20	B5	-2.98304e+06	1656.09	0	0	1	3	A7	-2.98988e+06	1668.14	0	0	1	3	C13	-2.96515e+06	1744.62	0	0	44	19
E4	-3.00259e+06	1856.61	0	0	26	20	F12	-2.98301e+06	1594.25	0	0	25	15	F7	-2.98988e+06	1666.19	0	0	36	19	C1	-2.96515e+06	1738.59	0	0	44	19
E9	-3.00257e+06	1823.64	0	0	26	20	F2	-2.98284e+06	1265.92	0	0	25	15	A6	-2.98988e+06	1659.4	0	0	1	3	B10	-2.96511e+06	1671.67	0	0	1	3
E8	-3.00254e+06	1769.58	0	0	26	20	F1	-2.98284e+06	1265.07	0	0	25	15	E5	-2.98986e+06	1626.84	0	0	25	5	B6	-2.96511e+06	1671.63	0	0	1	3
A7	-3.0025e+06	1684.99	0	0	1	3	F3	-2.98284e+06	1249.18	0	0	25	15	E10	-2.98985e+06	1605.58	0	0	25	5	B5	-2.96511e+06	1660.88	0	0	1	3
A12	-3.0025e+06	1684.99	0	0	1	3	F7	-2.98283e+06	1235.4	0	0	25	15	E11	-2.98981e+06	1527.8	0	0	24	1	A2	-2.96509e+06	1622.74	0	0	33	19
A6	-3.0025e+06	1682.15	0	0	1	3	F4	-2.98273e+06	1031.54	0	0	24	5	F4	-2.98975e+06	1408.03	0	0	35	5	F12	-2.96507e+06	1582.41	0	0	25	15
E5	-3.00248e+06	1649.31	0	0	25	5	F8	-2.98272e+06	1015.78	0	0	24	5	F8	-2.98974e+06	1387.2	0	0	35	5	A14	-2.96506e+06	1570.29	0	0	33	19
E10	-3.00248e+06	1637.15	0	0	25	5	F9	-2.98269e+06	955.272	0	0	23	1	F9	-2.9897e+06	1306.48	0	0	34	1	A13	-2.96506e+06	1559.83	0	0	33	19
E11	-3.00245e+06	1589	0	0	24	1	C2	-2.98261e+06	791.026	0	0	44	19	B12	-2.98967e+06	1249.2	0	0	33	19	A1	-2.96506e+06	1558.53	0	0	33	19
B2	-3.00245e+06	1583.04	0	0	33	19	C14	-2.9826e+06	773.123	0	0	44	19	C2	-2.98963e+06	1161.84	0	0	35	21	C4	-2.96505e+06	1535.37	0	0	44	19
B1	-3.00243e+06	1535.77	0	0	33	19	C13	-2.98259e+06	758.611	0	0	44	19	C14	-2.98962e+06	1142.08	0	0	35	21	C3	-2.96503e+06	1498.6	0	0	44	19
B3	-3.0024e+06	1486.49	0	0	33	19	C1	-2.98259e+06	747.522	0	0	44	19	C13	-2.98961e+06	1123.94	0	0	35	21	C8	-2.96502e+06	1483.05	0	0	44	19
B7	-3.0024e+06	1486.21	0	0	33	19	B12	-2.98253e+06	645.632	0	0	6	7	C1	-2.98961e+06	1114	0	0	35	21	C9	-2.96501e+06	1472.1	0	0	44	19
B4	-3.00231e+06	1306.41	0	0	32	5	C4	-2.98253e+06	632.569	0	0	44	19	B2	-2.98955e+06	990.276	0	0	33	19	A3	-2.96499e+06	1422.28	0	0	33	19
B8	-3.00231e+06	1297.54	0	0	32	5	A2	-2.98253e+06	630.688	0	0	33	19	C4	-2.98953e+06	958.694	0	0	35	21	A4	-2.96498e+06	1410.47	0	0	33	19
B9	-3.00228e+06	1251.56	0	0	31	1	C3	-2.98252e+06	623.573	0	0	44	19	B1	-2.98953e+06	954.69	0	0	33	19	A9	-2.96497e+06	1393.52	0	0	33	19
C2	-3.00213e+06	946.922	0	0	35	21	A14	-2.98252e+06	612.178	0	0	33	19	C3	-2.9895e+06	900.428	0	0	35	21	C5	-2.96497e+06	1378.63	0	0	43	5
C14	-3.00213e+06	934.586	0	0	35	21	A13	-2.98251e+06	605.04	0	0	33	19	B7	-2.9895e+06	892.792	0	0	33	19	A8	-2.96496e+06	1369.24	0	0	33	19
C13	-3.00212e+06	917.388	0	0	35	21	A1	-2.9825e+06	585.877	0	0	33	19	B3	-2.98949e+06	887.884	0	0	33	19	C10	-2.96496e+06	1362.88	0	0	43	5
C1	-3.00211e+06	901.656	0	0	35	21	C9	-2.98249e+06	560.708	0	0	44	19	C9	-2.98948e+06	857.81	0	0	35	21	F3	-2.96494e+06	1321.86	0	0	25	15
C4	-3.00206e+06	797.481	0	0	35	21	C8	-2.98249e+06	555.348	0	0	44	19	C8	-2.98947e+06	835.113	0	0	35	21	F1	-2.96493e+06	1310.07	0	0	25	15
C3	-3.00204e+06	757.441	0	0	35	21	A3	-2.98247e+06	517.519	0	0	33	19	C5	-2.98944e+06	786.095	0	0	34	5	F7	-2.96493e+06	1309.4	0	0	25	15
C9	-3.002e+06	692.111	0	0	35	21	C5	-2.98246e+06	492.138	0	0	43	5	C10	-2.98944e+06	771.682	0	0	34	5	F2	-2.96493e+06	1304.18	0	0	25	15
C8	-3.00199e+06	673.179	0	0	35	21	A4	-2.98245e+06	484.495	0	0	33	19	C11	-2.9894e+06	693.572	0	0	33	1	C11	-2.96492e+06	1287.88	0	0	42	1
C5	-3.00197e+06	629.868	0	0	34	5	C10	-2.98245e+06	477.145	0	0	43	5	B4	-2.98939e+06	677.202	0	0	32	5	A5	-2.96489e+06	1221.05	0	0	32	5
C10	-3.00197e+06	614.134	0	0	34	5	A9	-2.98244e+06	458.388	0	0	33	19	B8	-2.98938e+06	662.105	0	0	32	5	A10	-2.96488e+06	1209.72	0	0	32	5
C11	-3.00194e+06	564.008	0	0	33	1	C11	-2.98243e+06	429.807	0	0	42	1	B9	-2.98934e+06	587.456	0	0	31	1	A11	-2.96484e+06	1117.45	0	0	31	1
A2	-3.00184e+06	363.683	0	0	3	6	A8	-2.98243e+06	429.024	0	0	33	19	A2	-2.98928e+06	466.067	0	0	3	6	F4	-2.9648e+06	1048.89	0	0	24	5
A14	-3.00183e+06	351.812	0	0	4	8	B2	-2.98238e+06	331.087	0	0	3	6	A14	-2.98927e+06	440.666	0	0	4	8	F8	-2.96479e+06	1031.47	0	0	24	5
A13	-3.00182e+06	332.42	0	0	4	8	A5	-2.98237e+06	321.439	0	0	32	5	A13	-2.98926e+06	428.949	0	0	4	8	F9	-2.96475e+06	943.8	0	0	23	1
A1	-3.00182e+06	318.395	0	0	3	6	A10	-2.98237e+06	307.366	0	0	32	5	A1	-2.98926e+06	413.147	0	0	3	6	B12	-2.96462e+06	691.424	0	0	6	7
A3	-3.00179e+06	263.4	0	0	3	6	B1	-2.98235e+06	282.592	0	0	3	6	A4	-2.9892e+06	302.189	0	0	3	6	B2	-2.96449e+06	431.807	0	0	3	6
A4	-3.00179e+06	253.69	0	0	3	6	A11	-2.98234e+06	261.635	0	0	31	1	A3	-2.9892e+06	299.772	0	0	3	6	B1	-2.96447e+06	392.033	0	0	3	6
A9	-3.00175e+06	177.381	0	0	2	4	B7	-2.98233e+06	240.136	0	0	2	4	A9	-2.98917e+06	238.825	0	0	2	4	B7	-2.96444e+06	321.611	0	0	2	4
A8	-3.00172e+06	125.334	0	0	2	4	B3	-2.98233e+06	227.938	0	0	2	4	A8	-2.98914e+06	174.861	0	0	2	4	B3	-2.96444e+06	319.619	0	0	2	4
A5	-3.00169e+06	65.6798	0	0	1	2	B4	-2.98224e+06	63.6412	0	0	1	2	A5	-2.9891e+06	100.002	0	0	1	2	B4	-2.96433e+06	101.088	0	0	1	2
A10	-3.00168e+06	50.8196	0	0	1	2	B8	-2.98224e+06	54.6246	0	0	1	2	A10	-2.98909e+06	88.3388	0	0	1	2	B8	-2.96432e+06	91.6196	0	0	1	2
A11	-3.00166e+06	0	1	1	0	0	B9	-2.98221e+06	0	1	1	0	0	A11	-2.98905e+06	0	1	1	0	0	B9	-2.96428e+06	0	1	1	0	0

## Sheet: Table S6B
Table S6B. Analyses on the untreated data set of nucleus-encoded proteins (116 taxa and 64 proteins) using the MAM60+GFmix model. Toplogy name (Top.); Natural logarithm of likelihood (lnL); Likelihood Ratio Test (LRT); Chi-square P-value (P-value 1); Bonferroni-corrected P-value (P-value 2); Number of splits requried to make tree compatible with Maximum-Likelihood tree (Splits); Number of trees t…
IQ-TREE (p1)							GARP-mix (p1)							IQ-TREE (p1-5)							GARP-mix (p1-5)
Top.	lnL	LRT	P-value 1	P-value 2	Splits	Trees	Top.	lnL	LRT	P-value 1	P-value 2	Splits	Trees	Top.	lnL	LRT	P-value 1	P-value 2	Splits	Trees	Top.	lnL	LRT	P-value 1	P-value 2	Splits	Trees
D13	-1.90775e+06	4774.78	0	0	48	21	D13	-1.89072e+06	3567.59	0	0	48	21	D13	-1.90293e+06	4826.41	0	0	50	24	D13	-1.88332e+06	3499.75	0	0	47	19
D7	-1.90769e+06	4648.44	0	0	47	7	D12	-1.89065e+06	3414.76	0	0	47	7	D7	-1.90285e+06	4669.18	0	0	49	7	D12	-1.88324e+06	3337.51	0	0	42	7
D12	-1.90769e+06	4648.44	0	0	47	7	D7	-1.89065e+06	3414.75	0	0	47	7	D12	-1.90285e+06	4669.18	0	0	49	7	D7	-1.88324e+06	3337.21	0	0	42	7
D6	-1.90769e+06	4641.76	0	0	47	7	D6	-1.89064e+06	3407.69	0	0	47	7	D6	-1.90285e+06	4666.37	0	0	49	7	D6	-1.88324e+06	3333	0	0	42	7
D14	-1.9075e+06	4267.15	0	0	48	21	D14	-1.89047e+06	3051.84	0	0	48	21	D14	-1.90267e+06	4308.4	0	0	50	24	D14	-1.88307e+06	2985.81	0	0	43	17
D3	-1.9074e+06	4069.6	0	0	48	21	D8	-1.89038e+06	2882.33	0	0	48	21	D3	-1.90257e+06	4110.77	0	0	50	24	D3	-1.88298e+06	2811.2	0	0	43	17
D1	-1.9074e+06	4068.18	0	0	48	21	D3	-1.89038e+06	2879.91	0	0	48	21	D1	-1.90257e+06	4108.32	0	0	50	24	D9	-1.88297e+06	2803.06	0	0	43	17
D8	-1.9074e+06	4068.01	0	0	48	21	D1	-1.89038e+06	2876.87	0	0	48	21	D8	-1.90257e+06	4105.67	0	0	50	24	D4	-1.88297e+06	2799.64	0	0	43	17
D9	-1.9074e+06	4063.34	0	0	48	21	D2	-1.89038e+06	2871.79	0	0	48	21	D9	-1.90256e+06	4103.8	0	0	50	24	D1	-1.88297e+06	2796.36	0	0	43	17
D2	-1.90739e+06	4059.29	0	0	48	21	D9	-1.89038e+06	2871.76	0	0	48	21	D4	-1.90256e+06	4099.34	0	0	50	24	D8	-1.88297e+06	2793.06	0	0	43	17
D4	-1.90739e+06	4056.22	0	0	48	21	D4	-1.89037e+06	2868.31	0	0	48	21	D2	-1.90256e+06	4091.06	0	0	50	24	D2	-1.88296e+06	2777.39	0	0	43	17
D10	-1.90731e+06	3882.02	0	0	47	5	D10	-1.89029e+06	2708.81	0	0	47	5	D10	-1.90247e+06	3915.89	0	0	49	5	D10	-1.88288e+06	2612.86	0	0	42	5
D5	-1.90731e+06	3880.46	0	0	47	5	D5	-1.89029e+06	2693.8	0	0	47	5	D5	-1.90247e+06	3914.38	0	0	49	5	D5	-1.88288e+06	2604.79	0	0	42	5
D11	-1.90726e+06	3797.46	0	0	46	1	D11	-1.89024e+06	2598.42	0	0	46	1	D11	-1.90243e+06	3840.67	0	0	48	1	D11	-1.88284e+06	2529.06	0	0	41	1
C7	-1.90668e+06	2637.5	0	0	34	7	C6	-1.89002e+06	2159.56	0	0	34	7	C7	-1.90196e+06	2903.08	0	0	40	7	C7	-1.88281e+06	2467.35	0	0	46	7
C12	-1.90668e+06	2637.5	0	0	34	7	C12	-1.89002e+06	2159	0	0	34	7	C12	-1.90196e+06	2903.07	0	0	40	7	C12	-1.88281e+06	2467.34	0	0	46	7
C6	-1.90668e+06	2631.05	0	0	34	7	C7	-1.89002e+06	2159	0	0	34	7	C6	-1.90196e+06	2899.69	0	0	40	7	C6	-1.8828e+06	2461.85	0	0	46	7
B11	-1.90665e+06	2568.93	0	0	33	19	C14	-1.88975e+06	1629.59	0	0	35	21	B11	-1.90177e+06	2516.26	0	0	41	22	C14	-1.88254e+06	1931.88	0	0	47	19
B6	-1.90659e+06	2455.42	0	0	32	7	C2	-1.88975e+06	1618.31	0	0	35	21	B10	-1.90169e+06	2346.04	0	0	40	7	C13	-1.88254e+06	1927.04	0	0	47	19
B10	-1.90659e+06	2455.42	0	0	32	7	C13	-1.88974e+06	1605.53	0	0	35	21	B6	-1.90169e+06	2346.04	0	0	40	7	C2	-1.88253e+06	1920.87	0	0	47	19
B5	-1.90659e+06	2448.44	0	0	32	7	C1	-1.88974e+06	1600.86	0	0	35	21	B5	-1.90168e+06	2342.28	0	0	40	7	C1	-1.88252e+06	1900.46	0	0	47	19
F11	-1.90652e+06	2300.82	0	0	36	19	C3	-1.88973e+06	1576.42	0	0	35	21	C14	-1.90168e+06	2338.71	0	0	41	24	C4	-1.88251e+06	1883.58	0	0	47	19
F6	-1.90645e+06	2163.44	0	0	35	7	C4	-1.88973e+06	1572.88	0	0	35	21	C2	-1.90167e+06	2322.73	0	0	41	24	C3	-1.88251e+06	1882.24	0	0	47	19
F10	-1.90645e+06	2163.44	0	0	35	7	C9	-1.88969e+06	1502.44	0	0	35	21	C4	-1.90167e+06	2321.33	0	0	41	24	C9	-1.88248e+06	1818.75	0	0	47	19
F5	-1.90644e+06	2156.29	0	0	35	7	C8	-1.88968e+06	1486.93	0	0	35	21	C3	-1.90167e+06	2314.69	0	0	41	24	C8	-1.88245e+06	1749.36	0	0	47	19
B12	-1.90641e+06	2090.37	0	0	33	19	C5	-1.88966e+06	1436.66	0	0	34	5	C13	-1.90167e+06	2310.79	0	0	41	24	C10	-1.88244e+06	1735.67	0	0	46	5
C14	-1.9064e+06	2064.07	0	0	35	21	C10	-1.88966e+06	1433.79	0	0	34	5	C1	-1.90166e+06	2296.31	0	0	41	24	C5	-1.88243e+06	1716.66	0	0	46	5
C2	-1.90639e+06	2050.37	0	0	35	21	B11	-1.88963e+06	1370.43	0	0	33	19	C9	-1.90162e+06	2209.08	0	0	41	24	C11	-1.88239e+06	1634.82	0	0	45	1
C13	-1.90638e+06	2035.38	0	0	35	21	C11	-1.88962e+06	1357.23	0	0	33	1	C5	-1.90159e+06	2148.25	0	0	40	5	B11	-1.88223e+06	1310.42	0	0	29	17
C4	-1.90638e+06	2033.11	0	0	35	21	F11	-1.88961e+06	1339.28	0	0	36	19	C8	-1.90158e+06	2143.58	0	0	41	24	B6	-1.88214e+06	1125.72	0	0	24	7
C3	-1.90638e+06	2032.92	0	0	35	21	B10	-1.88955e+06	1215.4	0	0	32	7	C10	-1.90158e+06	2141.18	0	0	40	5	B10	-1.88214e+06	1124.76	0	0	24	7
C1	-1.90638e+06	2025.99	0	0	35	21	B6	-1.88955e+06	1215.39	0	0	32	7	C11	-1.90155e+06	2072.02	0	0	39	1	B5	-1.88213e+06	1120.37	0	0	24	7
C9	-1.90633e+06	1925.78	0	0	35	21	B5	-1.88954e+06	1207.6	0	0	32	7	F11	-1.90153e+06	2031.87	0	0	35	22	E7	-1.8821e+06	1047.51	0	0	34	7
B2	-1.90631e+06	1895.57	0	0	33	19	F10	-1.88953e+06	1178.61	0	0	35	7	B12	-1.90152e+06	2014.58	0	0	41	22	E12	-1.8821e+06	1047.47	0	0	34	7
B1	-1.90631e+06	1887.69	0	0	33	19	F6	-1.88953e+06	1178.6	0	0	35	7	F10	-1.90144e+06	1861.9	0	0	34	7	E6	-1.88208e+06	1005.56	0	0	34	7
C8	-1.9063e+06	1873.83	0	0	35	21	F5	-1.88952e+06	1170.24	0	0	35	7	F6	-1.90144e+06	1861.9	0	0	34	7	F11	-1.88207e+06	991.676	0	0	7	7
C5	-1.9063e+06	1865.22	0	0	34	5	E12	-1.88947e+06	1051.5	0	0	25	7	F5	-1.90144e+06	1858.4	0	0	34	7	A12	-1.88205e+06	956.961	0	0	35	7
C10	-1.9063e+06	1863.76	0	0	34	5	E7	-1.88947e+06	1051.49	0	0	25	7	B2	-1.90143e+06	1827.61	0	0	41	22	A7	-1.88205e+06	956.955	0	0	35	7
F12	-1.90629e+06	1843.14	0	0	36	19	E6	-1.88946e+06	1042.58	0	0	25	7	B1	-1.90142e+06	1817.44	0	0	41	22	A6	-1.88205e+06	952.595	0	0	35	7
B3	-1.90628e+06	1839.86	0	0	33	19	B12	-1.88939e+06	896.391	0	0	33	19	B7	-1.90139e+06	1759.41	0	0	41	22	F6	-1.88198e+06	805.543	0	0	1	3
B7	-1.90628e+06	1839.39	0	0	33	19	F12	-1.88938e+06	880.667	0	0	36	19	B3	-1.90139e+06	1756.71	0	0	41	22	F10	-1.88198e+06	805.537	0	0	1	3
C11	-1.90626e+06	1784.62	0	0	33	1	A12	-1.88935e+06	810.69	0	0	1	3	B4	-1.90132e+06	1605.39	0	0	40	5	F5	-1.88197e+06	797.675	0	0	1	3
B8	-1.90621e+06	1693.57	0	0	32	5	A7	-1.88935e+06	810.681	0	0	1	3	B8	-1.90131e+06	1604.26	0	0	40	5	B12	-1.88196e+06	767.592	0	0	25	15
B4	-1.90621e+06	1691.91	0	0	32	5	A6	-1.88934e+06	802.284	0	0	1	3	F12	-1.90128e+06	1537.04	0	0	35	22	E16	-1.8819e+06	654.942	0	0	35	22
F1	-1.90617e+06	1620.04	0	0	36	19	B2	-1.8893e+06	720.033	0	0	33	19	B9	-1.90128e+06	1526.94	0	0	39	1	E13	-1.88189e+06	642.784	0	0	35	22
B9	-1.90617e+06	1604.79	0	0	31	1	B1	-1.8893e+06	711.175	0	0	33	19	F1	-1.90118e+06	1335.36	0	0	35	22	E15	-1.88189e+06	629.478	0	0	35	22
F3	-1.90616e+06	1599.62	0	0	36	19	F1	-1.88928e+06	672.138	0	0	36	19	F3	-1.90117e+06	1319.13	0	0	35	22	E14	-1.88187e+06	601.37	0	0	35	22
F2	-1.90616e+06	1596.38	0	0	36	19	E15	-1.88927e+06	659.023	0	0	26	20	F2	-1.90117e+06	1313.88	0	0	35	22	B2	-1.88187e+06	597.325	0	0	25	15
F7	-1.90616e+06	1595.08	0	0	36	19	B7	-1.88927e+06	657.237	0	0	33	19	F7	-1.90117e+06	1308.25	0	0	35	22	E1	-1.88187e+06	591.215	0	0	35	22
F4	-1.90607e+06	1408.69	0	0	35	5	B3	-1.88927e+06	656.633	0	0	33	19	F4	-1.90108e+06	1127.5	0	0	34	5	E17	-1.88187e+06	591.215	0	0	35	22
F8	-1.90607e+06	1402.98	0	0	35	5	F3	-1.88926e+06	634.271	0	0	36	19	F8	-1.90107e+06	1118.38	0	0	34	5	B1	-1.88186e+06	574.33	0	0	25	15
F9	-1.90602e+06	1314.37	0	0	34	1	F7	-1.88926e+06	633.702	0	0	36	19	F9	-1.90103e+06	1040.48	0	0	33	1	F12	-1.88183e+06	510.671	0	0	7	5
E7	-1.90583e+06	921.884	0	0	25	7	F2	-1.88926e+06	630.449	0	0	36	19	A12	-1.90099e+06	961.861	0	0	25	7	B7	-1.88183e+06	506.872	0	0	25	15
E12	-1.90583e+06	921.884	0	0	25	7	E16	-1.88925e+06	625.621	0	0	27	24	A7	-1.90099e+06	961.859	0	0	25	7	E2	-1.88182e+06	501.237	0	0	35	22
E6	-1.90582e+06	913.995	0	0	25	7	E1	-1.88925e+06	614.881	0	0	26	20	A6	-1.90099e+06	956.419	0	0	25	7	B3	-1.88182e+06	500.278	0	0	25	15
A7	-1.90578e+06	836.68	0	0	1	3	E17	-1.88925e+06	614.881	0	0	26	20	E7	-1.90092e+06	818.979	0	0	1	3	A2	-1.88181e+06	464.929	0	0	36	19
A12	-1.90578e+06	836.68	0	0	1	3	E13	-1.88924e+06	600.127	0	0	27	24	E12	-1.90092e+06	818.976	0	0	1	3	E3	-1.8818e+06	453.728	0	0	35	22
A6	-1.90578e+06	829.762	0	0	1	3	E14	-1.88923e+06	582.767	0	0	26	20	E6	-1.90092e+06	804.865	0	0	1	3	A14	-1.8818e+06	452.163	0	0	36	19
E15	-1.90559e+06	445.989	0	0	26	20	E3	-1.8892e+06	518.379	0	0	26	20	A3	-1.90072e+06	419.045	0	0	26	20	E9	-1.8818e+06	447.967	0	0	35	22
E16	-1.90558e+06	437.191	0	0	27	24	B4	-1.88919e+06	508.451	0	0	32	5	A4	-1.90072e+06	410.841	0	0	26	20	E4	-1.88179e+06	440.554	0	0	35	22
E13	-1.90557e+06	410.201	0	0	27	24	B8	-1.88919e+06	507.183	0	0	32	5	A14	-1.90071e+06	392.132	0	0	27	24	A13	-1.88178e+06	422.582	0	0	36	19
E1	-1.90557e+06	409.346	0	0	26	20	E4	-1.88919e+06	501.756	0	0	26	20	A2	-1.9007e+06	382.626	0	0	26	20	A1	-1.88178e+06	421.053	0	0	36	19
E17	-1.90557e+06	409.346	0	0	26	20	E2	-1.88919e+06	500.885	0	0	26	20	A13	-1.90069e+06	364.045	0	0	27	24	E8	-1.88178e+06	415.562	0	0	35	22
E14	-1.90554e+06	357.104	0	0	26	20	E9	-1.88918e+06	481.707	0	0	26	20	E16	-1.90069e+06	359.356	0	0	7	11	A3	-1.88178e+06	412.023	0	0	36	19
E3	-1.90554e+06	349.261	0	0	26	20	F4	-1.88916e+06	448.134	0	0	35	5	E15	-1.90069e+06	349.493	0	0	5	7	A4	-1.88177e+06	398.051	0	0	36	19
E4	-1.90553e+06	335.543	0	0	26	20	F8	-1.88916e+06	445.032	0	0	35	5	A1	-1.90069e+06	344.731	0	0	26	20	A9	-1.88176e+06	374.306	0	0	36	19
E9	-1.90551e+06	283.042	0	0	26	20	E8	-1.88916e+06	437.525	0	0	26	20	E13	-1.90068e+06	334.496	0	0	7	11	B4	-1.88175e+06	355.399	0	0	24	5
E2	-1.90551e+06	280.641	0	0	26	20	B9	-1.88914e+06	407.887	0	0	31	1	A9	-1.90067e+06	324.246	0	0	26	20	B8	-1.88175e+06	347.023	0	0	24	5
A14	-1.9055e+06	261.665	0	0	4	8	E5	-1.88911e+06	346.858	0	0	25	5	E1	-1.90067e+06	311.916	0	0	6	9	E5	-1.88173e+06	318.512	0	0	34	5
A3	-1.9055e+06	261.568	0	0	3	6	E10	-1.88911e+06	342.805	0	0	25	5	E17	-1.90067e+06	311.916	0	0	6	9	A8	-1.88173e+06	312.357	0	0	36	19
A2	-1.90549e+06	254.237	0	0	3	6	F9	-1.88911e+06	342.499	0	0	34	1	E3	-1.90065e+06	269.964	0	0	3	6	E10	-1.88173e+06	311.914	0	0	34	5
A4	-1.90549e+06	246.687	0	0	3	6	A14	-1.88909e+06	293.058	0	0	4	8	E14	-1.90065e+06	267.642	0	0	4	6	F1	-1.88172e+06	295.477	0	0	3	6
A13	-1.90548e+06	235.917	0	0	4	8	A2	-1.88908e+06	288.212	0	0	3	6	E4	-1.90064e+06	262.838	0	0	3	6	F2	-1.88171e+06	277.61	0	0	3	6
A1	-1.90548e+06	224.908	0	0	3	6	A13	-1.88907e+06	268.832	0	0	4	8	A5	-1.90063e+06	228.223	0	0	25	5	F3	-1.88171e+06	275.379	0	0	2	4
E8	-1.90546e+06	199.033	0	0	26	20	A1	-1.88907e+06	268.728	0	0	3	6	A10	-1.90063e+06	224.99	0	0	25	5	F7	-1.88171e+06	273.557	0	0	2	4
E5	-1.90545e+06	175.274	0	0	25	5	A3	-1.88907e+06	250.561	0	0	3	6	A8	-1.90062e+06	213.441	0	0	26	20	B9	-1.88171e+06	265.564	0	0	23	1
E10	-1.90545e+06	174.198	0	0	25	5	A4	-1.88906e+06	231.218	0	0	3	6	E9	-1.90061e+06	198.696	0	0	2	4	A5	-1.8817e+06	262.016	0	0	35	5
A9	-1.90545e+06	172.198	0	0	2	4	E11	-1.88905e+06	226.015	0	0	24	1	E2	-1.90061e+06	186.221	0	0	3	5	A10	-1.8817e+06	255.045	0	0	35	5
A8	-1.90541e+06	89.7252	0	0	2	4	A9	-1.88904e+06	195.763	0	0	2	4	A11	-1.90059e+06	147.131	0	0	24	1	E11	-1.88168e+06	221.514	0	0	33	1
A5	-1.90541e+06	89.0466	0	0	1	2	A8	-1.88902e+06	159.165	0	0	2	4	E8	-1.90056e+06	95.7246	0	0	2	4	A11	-1.88166e+06	171.213	0	0	34	1
E11	-1.90541e+06	88.3342	0	0	24	1	A5	-1.88899e+06	95.6222	0	0	1	2	E5	-1.90055e+06	82.2032	0	0	1	2	F4	-1.88162e+06	96.7954	0	0	1	2
A10	-1.90541e+06	87.7156	0	0	1	2	A10	-1.88899e+06	94.6444	0	0	1	2	E10	-1.90055e+06	75.1814	0	0	1	2	F8	-1.88162e+06	85.074	0	0	1	2
A11	-1.90536e+06	0	1	1	0	0	A11	-1.88894e+06	0	1	1	0	0	E11	-1.90051e+06	0	1	1	0	0	F9	-1.88157e+06	0	1	1	0	0

## Sheet: Table S6C
Table S6C. Analyses on the untreated data set of mitochondrion-encoded proteins (116 taxa and 44 proteins) using the MAM60+GFmix model. Toplogy name (Top.); Natural logarithm of likelihood (lnL); Likelihood Ratio Test (LRT); Chi-square P-value (P-value 1); Bonferroni-corrected P-value (P-value 2); Number of splits requried to make tree compatible with Maximum-Likelihood tree (Splits); Number of t…
IQ-TREE (p1)							GARP-mix (p1)							IQ-TREE (p1-5)							GARP-mix (p1-5)
Top.	lnL	LRT	P-value 1	P-value 2	Splits	Trees	Top.	lnL	LRT	P-value 1	P-value 2	Splits	Trees	Top.	lnL	LRT	P-value 1	P-value 2	Splits	Trees	Top.	lnL	LRT	P-value 1	P-value 2	Splits	Trees
E6	-1.0945e+06	3774.44	0	0	42	30	E6	-1.09014e+06	3790.85	0	0	50	11	E12	-1.09065e+06	3957.15	0	0	42	30	E12	-1.08572e+06	4292.68	0	0	49	7
E7	-1.0945e+06	3774.44	0	0	42	30	E7	-1.09014e+06	3790.85	0	0	50	11	E7	-1.09065e+06	3957.15	0	0	42	30	E7	-1.08572e+06	4292.68	0	0	49	7
E12	-1.0945e+06	3774.44	0	0	42	30	E12	-1.09014e+06	3790.85	0	0	50	11	E6	-1.09065e+06	3956.15	0	0	42	30	E6	-1.08572e+06	4292.37	0	0	49	7
E15	-1.0942e+06	3179.28	0	0	40	20	E15	-1.08984e+06	3179.58	0	0	49	20	E15	-1.0904e+06	3440.95	0	0	40	20	E15	-1.08544e+06	3729.72	0	0	50	24
E14	-1.09419e+06	3160.26	0	0	40	20	E14	-1.08983e+06	3166.49	0	0	49	20	E14	-1.09038e+06	3410.52	0	0	40	20	E14	-1.08543e+06	3706.42	0	0	50	24
E2	-1.09416e+06	3106.33	0	0	40	20	E2	-1.08981e+06	3116.25	0	0	49	20	E2	-1.09036e+06	3361.93	0	0	40	20	E2	-1.0854e+06	3654.23	0	0	50	24
E1	-1.09415e+06	3079.42	0	0	40	20	E1	-1.08979e+06	3082.85	0	0	49	20	E1	-1.09034e+06	3333.79	0	0	40	20	E1	-1.08538e+06	3625.89	0	0	50	24
E17	-1.09415e+06	3079.42	0	0	40	20	E17	-1.08979e+06	3082.85	0	0	49	20	E17	-1.09034e+06	3333.79	0	0	40	20	E17	-1.08538e+06	3625.89	0	0	50	24
E16	-1.09415e+06	3067.72	0	0	40	20	E16	-1.08978e+06	3075.3	0	0	49	20	E13	-1.09034e+06	3326.01	0	0	40	20	E13	-1.08538e+06	3616.19	0	0	50	24
E13	-1.09415e+06	3067.57	0	0	40	20	E13	-1.08978e+06	3070.79	0	0	49	20	E16	-1.09034e+06	3321.53	0	0	40	20	E16	-1.08538e+06	3609.38	0	0	50	24
E8	-1.09412e+06	3007.5	0	0	40	20	E8	-1.08976e+06	3029.65	0	0	49	20	E8	-1.09029e+06	3239.76	0	0	40	20	E8	-1.08534e+06	3545.67	0	0	50	24
E9	-1.09411e+06	2991.32	0	0	40	20	E9	-1.08976e+06	3018.06	0	0	49	20	E9	-1.09029e+06	3225.21	0	0	40	20	E9	-1.08534e+06	3540.54	0	0	50	24
E4	-1.09411e+06	2988	0	0	40	20	E4	-1.08975e+06	3013.01	0	0	49	20	E3	-1.09028e+06	3208.73	0	0	40	20	E3	-1.08534e+06	3533.02	0	0	50	24
E3	-1.0941e+06	2978.04	0	0	40	20	E3	-1.08975e+06	3011.66	0	0	49	20	E4	-1.09028e+06	3205.48	0	0	40	20	E4	-1.08533e+06	3523.35	0	0	50	24
E5	-1.09408e+06	2932.79	0	0	41	24	E5	-1.08972e+06	2948.72	0	0	49	5	E5	-1.09025e+06	3155.83	0	0	41	24	E5	-1.08531e+06	3476.39	0	0	49	5
E10	-1.09408e+06	2928.77	0	0	40	20	E10	-1.08972e+06	2945.6	0	0	48	1	E10	-1.09025e+06	3147.77	0	0	40	20	E10	-1.08531e+06	3470.6	0	0	49	5
E11	-1.09407e+06	2925.91	0	0	41	24	E11	-1.08972e+06	2942.67	0	0	49	5	E11	-1.09025e+06	3145.85	0	0	41	24	E11	-1.0853e+06	3466.07	0	0	48	1
F5	-1.09391e+06	2597.49	0	0	48	25	F11	-1.0894e+06	2296.9	0	0	46	15	F11	-1.09002e+06	2694.23	0	0	46	15	F11	-1.08491e+06	2673.81	0	0	47	19
F10	-1.09391e+06	2597.49	0	0	48	25	F5	-1.08938e+06	2275.04	0	0	43	11	F6	-1.08998e+06	2615.09	0	0	48	25	A12	-1.08488e+06	2622.32	0	0	47	7
F6	-1.09391e+06	2597.49	0	0	48	25	F6	-1.08938e+06	2275.04	0	0	43	11	F10	-1.08998e+06	2615.09	0	0	48	25	A7	-1.08488e+06	2622.32	0	0	47	7
F11	-1.09391e+06	2588.2	0	0	46	15	F10	-1.08938e+06	2275.04	0	0	43	11	F5	-1.08998e+06	2614.74	0	0	48	25	A6	-1.08488e+06	2620.6	0	0	47	7
A6	-1.09375e+06	2275.84	0	0	36	27	A6	-1.08938e+06	2271.69	0	0	48	11	A12	-1.08983e+06	2310.08	0	0	36	27	F6	-1.08486e+06	2575.48	0	0	42	7
A7	-1.09375e+06	2275.84	0	0	36	27	A7	-1.08938e+06	2271.69	0	0	48	11	A7	-1.08983e+06	2310.08	0	0	36	27	F10	-1.08486e+06	2575.48	0	0	42	7
A12	-1.09375e+06	2275.84	0	0	36	27	A12	-1.08938e+06	2271.69	0	0	48	11	A6	-1.08983e+06	2309.28	0	0	36	27	F5	-1.08486e+06	2574.56	0	0	42	7
F12	-1.09357e+06	1913.98	0	0	46	15	F12	-1.08905e+06	1598.02	0	0	42	13	F12	-1.08965e+06	1948.09	0	0	46	15	A2	-1.08455e+06	1959.51	0	0	48	21
F2	-1.09352e+06	1816.54	0	0	46	15	A2	-1.08902e+06	1540.26	0	0	47	17	F3	-1.08962e+06	1882.76	0	0	46	15	A13	-1.08455e+06	1949.52	0	0	48	21
F3	-1.09352e+06	1815.81	0	0	46	15	A14	-1.08901e+06	1524.05	0	0	47	17	F2	-1.08961e+06	1876.84	0	0	46	15	A1	-1.08455e+06	1949.42	0	0	48	21
F7	-1.09352e+06	1810.77	0	0	46	15	A13	-1.08901e+06	1521.17	0	0	47	17	F7	-1.08961e+06	1876.24	0	0	46	15	A14	-1.08455e+06	1947.45	0	0	48	21
F1	-1.09351e+06	1802.31	0	0	46	15	A1	-1.08901e+06	1520.74	0	0	47	17	F1	-1.08961e+06	1864.22	0	0	46	15	F12	-1.08453e+06	1909.85	0	0	43	17
F4	-1.09349e+06	1761.91	0	0	47	19	F2	-1.089e+06	1498.08	0	0	42	13	F4	-1.08959e+06	1820.14	0	0	47	19	A8	-1.0845e+06	1856.18	0	0	48	21
F8	-1.09349e+06	1753.78	0	0	46	15	F7	-1.089e+06	1497.26	0	0	42	13	F8	-1.08958e+06	1810.5	0	0	46	15	A9	-1.0845e+06	1849.14	0	0	48	21
F9	-1.09349e+06	1753.6	0	0	47	19	F3	-1.08899e+06	1494.03	0	0	42	13	F9	-1.08958e+06	1806.36	0	0	47	19	F3	-1.0845e+06	1846.43	0	0	43	17
B5	-1.09345e+06	1681.44	0	0	45	25	F1	-1.08899e+06	1484.77	0	0	42	13	A2	-1.08951e+06	1665.53	0	0	34	17	A3	-1.08449e+06	1843.19	0	0	48	21
B6	-1.09345e+06	1681.44	0	0	45	25	A3	-1.08898e+06	1471.63	0	0	47	17	A13	-1.0895e+06	1645.13	0	0	34	17	F2	-1.08449e+06	1842.31	0	0	43	17
B10	-1.09345e+06	1681.44	0	0	45	25	A8	-1.08898e+06	1469.23	0	0	47	17	A1	-1.0895e+06	1644.91	0	0	34	17	F7	-1.08449e+06	1840.93	0	0	43	17
B11	-1.09344e+06	1663.49	0	0	43	15	A4	-1.08898e+06	1465.55	0	0	47	17	A14	-1.08949e+06	1639.68	0	0	34	17	A4	-1.08449e+06	1839.3	0	0	48	21
A2	-1.09339e+06	1554.94	0	0	34	17	A9	-1.08898e+06	1462.56	0	0	47	17	B11	-1.08947e+06	1591.2	0	0	43	15	F1	-1.08449e+06	1828.66	0	0	43	17
A1	-1.09338e+06	1538.47	0	0	34	17	F4	-1.08896e+06	1435.43	0	0	42	5	A8	-1.08945e+06	1554.1	0	0	34	17	A5	-1.08447e+06	1804.82	0	0	47	5
A14	-1.09338e+06	1538.02	0	0	34	17	F8	-1.08896e+06	1428.63	0	0	41	1	A9	-1.08944e+06	1537.82	0	0	34	17	A10	-1.08447e+06	1798.95	0	0	47	5
A13	-1.09338e+06	1535.86	0	0	34	17	F9	-1.08896e+06	1427.89	0	0	42	5	A4	-1.08944e+06	1530.45	0	0	34	17	A11	-1.08447e+06	1793.06	0	0	46	1
A8	-1.09335e+06	1471.24	0	0	34	17	A5	-1.08896e+06	1419.64	0	0	47	5	A3	-1.08944e+06	1524.33	0	0	34	17	F4	-1.08446e+06	1775.11	0	0	42	5
A4	-1.09334e+06	1465.9	0	0	34	17	A10	-1.08895e+06	1414.78	0	0	46	1	B10	-1.08943e+06	1515.28	0	0	45	25	F8	-1.08446e+06	1766.98	0	0	42	5
A9	-1.09334e+06	1459.32	0	0	34	17	A11	-1.08895e+06	1411.67	0	0	47	5	B6	-1.08943e+06	1515.28	0	0	45	25	F9	-1.08445e+06	1763.02	0	0	41	1
A3	-1.09334e+06	1452.9	0	0	34	17	B11	-1.08891e+06	1332.88	0	0	40	13	B5	-1.08943e+06	1514.76	0	0	45	25	B11	-1.08434e+06	1536.85	0	0	41	17
A5	-1.09333e+06	1428.96	0	0	35	21	B5	-1.08891e+06	1321.42	0	0	37	11	A5	-1.08943e+06	1504.74	0	0	35	21	B10	-1.08429e+06	1437.35	0	0	36	7
A10	-1.09332e+06	1423.36	0	0	34	17	B6	-1.08891e+06	1321.42	0	0	37	11	A10	-1.08942e+06	1498.57	0	0	34	17	B6	-1.08429e+06	1437.34	0	0	36	7
A11	-1.09332e+06	1420.16	0	0	35	21	B10	-1.08891e+06	1321.42	0	0	37	11	A11	-1.08942e+06	1491.52	0	0	35	21	B5	-1.08429e+06	1436.39	0	0	36	7
D6	-1.09319e+06	1164.93	0	0	35	27	D13	-1.08869e+06	877.253	0	0	6	5	D13	-1.08917e+06	987.138	0	0	33	17	C12	-1.08413e+06	1123.29	0	0	33	7
D7	-1.09319e+06	1164.93	0	0	35	27	C6	-1.08868e+06	865.221	0	0	34	11	D7	-1.08913e+06	903.644	0	0	35	27	C7	-1.08413e+06	1123.29	0	0	33	7
D12	-1.09319e+06	1164.93	0	0	35	27	C12	-1.08868e+06	865.219	0	0	34	11	D12	-1.08913e+06	903.637	0	0	35	27	C6	-1.08413e+06	1121.36	0	0	33	7
D13	-1.09319e+06	1160.26	0	0	33	17	C7	-1.08868e+06	865.219	0	0	34	11	D6	-1.08913e+06	902.919	0	0	35	27	D13	-1.08404e+06	930.107	0	0	7	7
B12	-1.09312e+06	1022.93	0	0	43	15	D6	-1.08867e+06	851.706	0	0	2	5	B12	-1.08911e+06	871.693	0	0	43	15	D12	-1.08399e+06	826.551	0	0	1	3
B2	-1.09307e+06	921.636	0	0	43	15	D12	-1.08867e+06	851.703	0	0	2	5	C7	-1.08909e+06	838.826	0	0	4	9	D7	-1.08399e+06	826.539	0	0	1	3
B1	-1.09306e+06	890.667	0	0	43	15	D7	-1.08867e+06	851.703	0	0	2	5	C12	-1.08909e+06	838.825	0	0	4	9	D6	-1.08398e+06	822.577	0	0	1	3
C6	-1.09305e+06	885.242	0	0	4	9	B12	-1.08859e+06	684.763	0	0	37	13	C6	-1.08909e+06	838.493	0	0	4	9	B12	-1.08398e+06	811.069	0	0	38	17
C7	-1.09305e+06	885.241	0	0	4	9	B2	-1.08853e+06	564.182	0	0	36	11	B2	-1.08907e+06	786.603	0	0	43	15	B2	-1.08393e+06	719.036	0	0	37	15
C12	-1.09305e+06	885.241	0	0	4	9	B1	-1.08851e+06	532.792	0	0	36	11	B1	-1.08905e+06	756.717	0	0	43	15	B1	-1.08392e+06	686.547	0	0	37	15
B3	-1.09305e+06	876.383	0	0	43	15	B7	-1.08851e+06	518.701	0	0	36	11	B7	-1.08905e+06	747.867	0	0	43	15	B7	-1.08391e+06	675.441	0	0	37	15
B7	-1.09305e+06	876.383	0	0	43	15	B3	-1.08851e+06	518.658	0	0	36	11	B3	-1.08905e+06	745.992	0	0	43	15	B3	-1.08391e+06	675.437	0	0	37	15
B4	-1.09303e+06	839.731	0	0	44	19	B4	-1.08849e+06	485.174	0	0	36	5	B4	-1.08903e+06	705.624	0	0	44	19	B4	-1.08388e+06	625.218	0	0	36	5
B9	-1.09303e+06	836.857	0	0	44	19	B9	-1.08849e+06	484.584	0	0	36	5	B9	-1.08902e+06	696	0	0	44	19	B8	-1.08388e+06	621.473	0	0	36	5
B8	-1.09303e+06	831.245	0	0	43	15	B8	-1.08849e+06	477.242	0	0	35	1	B8	-1.08902e+06	693.808	0	0	43	15	B9	-1.08388e+06	613.51	0	0	35	1
D14	-1.09286e+06	495.096	0	0	33	17	D14	-1.08834e+06	185.376	0	0	5	5	D14	-1.08879e+06	237.591	0	0	33	17	C2	-1.0838e+06	457.652	0	0	34	21
D2	-1.09281e+06	401.862	0	0	33	17	C2	-1.08832e+06	147.787	0	0	33	17	C2	-1.08877e+06	195.278	0	0	3	6	C1	-1.08379e+06	437.492	0	0	34	21
D3	-1.0928e+06	386.394	0	0	33	17	C1	-1.08831e+06	120.738	0	0	33	17	D2	-1.08876e+06	175.458	0	0	33	17	C14	-1.08379e+06	427.532	0	0	34	21
D1	-1.0928e+06	385.455	0	0	33	17	C14	-1.08831e+06	117.383	0	0	33	17	C1	-1.08876e+06	174.126	0	0	3	6	C13	-1.08378e+06	426.031	0	0	34	21
D4	-1.0928e+06	376.558	0	0	33	17	C13	-1.0883e+06	113.452	0	0	33	17	C13	-1.08876e+06	169.435	0	0	4	8	C8	-1.08375e+06	352.012	0	0	34	21
D8	-1.09279e+06	365.103	0	0	33	17	D2	-1.08829e+06	83.428	0	0	2	4	C14	-1.08876e+06	166.387	0	0	4	8	C4	-1.08374e+06	326.625	0	0	34	21
D9	-1.09279e+06	362.37	0	0	33	17	D3	-1.08828e+06	71.8722	0	0	2	4	D1	-1.08875e+06	156.817	0	0	33	17	C9	-1.08373e+06	316.504	0	0	34	21
D5	-1.09278e+06	327.363	0	0	34	21	D1	-1.08828e+06	66.453	0	0	2	4	D3	-1.08875e+06	151.654	0	0	33	17	C5	-1.08373e+06	309.315	0	0	33	5
D11	-1.09277e+06	323.191	0	0	34	21	D4	-1.08828e+06	62.584	0	0	2	4	D4	-1.08875e+06	141.835	0	0	33	17	C10	-1.08372e+06	305.006	0	0	33	5
D10	-1.09277e+06	321.584	0	0	33	17	C8	-1.08828e+06	57.6332	0.00502	0.08198	33	17	D8	-1.08874e+06	136.856	0	0	33	17	C11	-1.08372e+06	296.789	0	0	32	1
C2	-1.0927e+06	176.667	0	0	3	6	D8	-1.08827e+06	47.6588	0	0	1	2	D9	-1.08874e+06	129.869	0	0	33	17	C3	-1.08372e+06	288.473	0	0	34	21
C1	-1.09269e+06	155.966	0	0	3	6	C4	-1.08827e+06	44.5618	0.08622	0.78408	33	17	D5	-1.08872e+06	88.5278	0	2e-05	34	21	D14	-1.08366e+06	170.438	0	0	6	7
C14	-1.09269e+06	153.761	0	0	4	8	D9	-1.08827e+06	44.3856	0	0	1	2	D10	-1.08872e+06	80.7312	1e-05	0.00012	33	17	D2	-1.08362e+06	104.429	0	0	3	6
C13	-1.09269e+06	153.15	0	0	4	8	C9	-1.08826e+06	31.2318	0.55532	1	33	17	D11	-1.08871e+06	78.8122	2e-05	0.00043	34	21	D1	-1.08361e+06	82.8796	0	0	3	6
C8	-1.09265e+06	78.2988	0	0	2	4	C5	-1.08826e+06	26.6156	0.77625	0.99944	33	5	C8	-1.08871e+06	75.4594	0	0	2	4	D3	-1.08361e+06	73.2046	0	0	3	6
C4	-1.09264e+06	65.3026	0	0	1	2	C10	-1.08826e+06	19.5628	0.95844	0.95844	32	1	C4	-1.0887e+06	50.0578	0	0	1	2	D4	-1.08361e+06	68.849	0	0	3	6
C9	-1.09264e+06	51.274	0	0	1	2	C11	-1.08826e+06	16.9124	0.9908	1	33	5	C9	-1.0887e+06	41.3406	0	0	1	2	D8	-1.0836e+06	63.3812	0	0	2	4
C5	-1.09264e+06	50.4932	0	0	3	6	D5	-1.08825e+06	8.2408	0.0041	0.00818	1	2	C5	-1.08869e+06	38.5578	0	0	3	6	D9	-1.0836e+06	58.897	0	0	2	4
C10	-1.09263e+06	43.97	0	0	2	4	C3	-1.08825e+06	4.8326	1	1	33	17	C10	-1.08869e+06	32.6644	0	0	2	4	D5	-1.08358e+06	11.984	0.00054	0.00107	1	2
C11	-1.09263e+06	39.6988	0	0	3	6	D11	-1.08825e+06	2.9624	0.08522	0.16318	1	2	C11	-1.08869e+06	24.764	2e-05	0.0001	3	6	D10	-1.08357e+06	2.6252	0.10518	0.1993	1	2
C3	-1.09261e+06	0	1	1	0	0	D10	-1.08825e+06	0	1	1	0	0	C3	-1.08867e+06	0	1	1	0	0	D11	-1.08357e+06	0	1	1	0	0
