# Supplementary material for: A site-and-branch-heterogeneous model on an expanded dataset favor mitochondria as sister to known Alphaproteobacteria
Source: Research Square preprint supplement (doi:10.21203/rs.3.rs-557223/v1), 2021-05-28
Supplement: Supplementary file 7 [file b840ec1208bd30ff07432c38.xlsx]

## Sheet: Table S3
Table S3. Summary of major features for each of the 154 alphaproteobacterial MAGs reconstructed from diverse metagenomes sequenced in this study.
MAG name	Group (GTDB taxonomy)	Completeness	Redundancy	Strain heterogeneity	Genome size	Contig number	N50	GC content	RED value	Bch genes
Alphaproteobacterium_ALCH-01	o__Rhodobacterales	63.67	0.68	100	2723461	330	10780	68.348	0.966138	9
Alphaproteobacterium_ALCH-11	o__Sphingomonadales	94.56	1.35	0	2937932	123	32807	65.1785	0.975438	17
Alphaproteobacterium_ALCH-12	o__Sphingomonadales	93.86	0	0	2598620	83	50168	62.2091	0.974887	15
Alphaproteobacterium_ALCH-13	o__Sphingomonadales	68.58	0.68	100	2393354	182	18937	65.9291	0.995222	16
Alphaproteobacterium_ALCH-14	o__Sphingomonadales	82.57	0	0	2642414	190	20913	64.0691	0.995302	12
Alphaproteobacterium_ALCH-15	o__Rhizobiales	72.6	0.34	0	3667909	449	10200	65.5901	0.981338	1
Alphaproteobacterium_ALCH-16	o__Caulobacterales	85.52	0.9	33.33	2423370	143	27106	64.114	0.965799	3
Alphaproteobacterium_ALCH-17	o__Rhizobiales	77.03	0.75	50	2457142	336	8408	62.3943	0.945447	16
Alphaproteobacterium_ALCH-18	o__Geminicoccales	80.23	1.35	0	3801447	525	8473	68.8641	0.742241	15
Alphaproteobacterium_ALCH-19	o__Rhizobiales	60.54	0.68	100	4043796	455	11445	63.9782	0.944218	12
Alphaproteobacterium_ALCH-02	o__Rhodobacterales	86.39	0	0	3427251	223	22782	70.3182	0.967193	15
Alphaproteobacterium_ALCH-20	o__Caulobacterales	83.33	0	0	2513984	109	37957	64.4598	0.977876	7
Alphaproteobacterium_ALCH-21	o__Caulobacterales	90.54	1.01	0	2642212	121	37425	63.8345	0.96607	15
Alphaproteobacterium_ALCH-22	o__Caulobacterales	76.15	0.68	0	2583184	144	24759	63.868	0.989313	3
Alphaproteobacterium_ALCH-23	o__Rhizobiales	67.77	0	0	3054497	301	13459	61.4832	0.919846	12
Alphaproteobacterium_ALCH-24	o__Rhizobiales	97.97	0.68	0	3433708	43	160402	62.1982	0.906094	15
Alphaproteobacterium_ALCH-25	o__Rhizobiales	67.77	0.68	0	3843507	275	19935	60.4904	0.919832	11
Alphaproteobacterium_ALCH-26	o__Rhodospirillales	94.59	0.68	0	3222886	71	61799	68.9666	0.77344	5
Alphaproteobacterium_ALCH-27	o__Rhodospirillales	92.57	1.35	0	3013782	88	45984	69.1495	0.766815	5
Alphaproteobacterium_ALCH-28	o__Rhodospirillales	61.6	0.34	0	2065477	95	26215	68.2364	0.770028	3
Alphaproteobacterium_ALCH-29	o__Rhodobacterales	84.5	0	0	3529043	87	52224	67.3834	0.910702	13
Alphaproteobacterium_ALCH-30	o__UBA6615	94.59	0.68	0	4851152	163	44538	68.7347	0.681814	1
Alphaproteobacterium_ALCH-31	o__Kiloniellales	69.62	0.68	0	3600124	215	24226	68.577	0.872255	1
Alphaproteobacterium_ALCH-32	o__Micavibrionales	82.09	0.49	25	1601376	137	17814	43.4761	0.930292	0
Alphaproteobacterium_ALCH-33-01	o__Kiloniellales	79.23	3.06	50	4421132	431	13613	67.8362	0.72276	3
Alphaproteobacterium_ALCH-34	o__Rhizobiales	73.56	0	0	2529513	471	5978	56.5144	0.91245	7
Alphaproteobacterium_ALCH-35	o__Rhodobacterales	79.25	0.68	0	2949251	334	10993	62.5488	0.953655	9
Alphaproteobacterium_ALCH-36	o__Geminicoccales	95.21	1.69	25	4621999	311	22767	67.684	0.788855	17
Alphaproteobacterium_ALCH-37	o__Micavibrionales	69.62	0	0	884629	153	6549	39.9329	0.945649	0
Alphaproteobacterium_ALCH-39-01	o__Micavibrionales	95.27	0.34	0	1701161	71	44089	44.0735	0.954303	0
Alphaproteobacterium_ALCH-04	o__Rhodobacterales	64.33	1.01	66.67	2118019	222	13020	68.145	0.981408	13
Alphaproteobacterium_ALCH-41	o__Rhodobacterales	81.3	0.68	100	2712358	95	39397	73.546	0.881999	15
Alphaproteobacterium_ALCH-42	o__Rhodobacterales	96.23	0.34	0	3064790	74	69504	71.2428	0.878709	15
Alphaproteobacterium_ALCH-43	o__Rhodobacterales	82.16	0.34	100	3451977	116	35918	72.3998	0.897891	17
Alphaproteobacterium_ALCH-44	o__Rhizobiales	55.28	0.68	0	3123656	417	8901	63.1829	0.942074	11
Alphaproteobacterium_ALCH-45	o__Rhodobacterales	74.51	0.34	0	2480836	233	14427	62.9293	0.993591	15
Alphaproteobacterium_ALCH-46-01	o__Sphingomonadales	90.42	2.03	50	2553328	91	42590	62.0353	0.988674	16
Alphaproteobacterium_ALCH-48	o__Rhodobacterales	96.93	1.69	33.33	2977348	107	43310	63.0627	0.988989	17
Alphaproteobacterium_ALCH-49-01	o__Rhodobacterales	69.98	0	0	2795170	157	20766	70.5771	0.907309	13
Alphaproteobacterium_ALCH-05	o__Rhodobacterales	69.59	1.01	100	2268126	273	9862	67.5479	0.959826	10
Alphaproteobacterium_ALCH-50	o__Rhodobacterales	88.12	0.68	0	3129120	126	33487	68.771	0.905599	15
Alphaproteobacterium_ALCH-51	o__Caulobacterales	55.11	1.35	0	1909252	379	5526	60.9339	0.902435	8
Alphaproteobacterium_ALCH-52	o__Sphingomonadales	89.07	0.68	0	2079740	163	20382	66.3374	0.924145	9
Alphaproteobacterium_ALCH-53	o__Sphingomonadales	83.59	0.68	0	2313193	177	17426	66.3976	0.938657	15
Alphaproteobacterium_ALCH-55	o__Caulobacterales	82.22	0.34	0	2503250	364	8350	67.543	0.82859	1
Alphaproteobacterium_ALCH-56	o__Caulobacterales	88.2	0.68	100	2589686	75	62913	66.5968	0.932628	15
Alphaproteobacterium_ALCH-57	o__Azospirillales	83.78	0.84	33.33	3811347	130	41893	67.4095	0.808769	4
Alphaproteobacterium_ALCH-59	o__Rhizobiales	98.99	0	0	3447136	54	90227	62.708	0.890624	17
Alphaproteobacterium_ALCH-06	o__Caulobacterales	75.34	0.68	0	2278262	354	7311	62.8459	0.872997	11
Alphaproteobacterium_ALCH-60	o__Rhizobiales	94.04	0.34	0	2363863	24	175199	62.5348	0.808082	15
Alphaproteobacterium_ALCH-61	o__Caulobacterales	80.07	0	0	2780507	61	108820	63.7999	0.977583	15
Alphaproteobacterium_ALCH-63	o__Kiloniellales	91.89	1.01	0	4749108	73	130192	66.6752	0.868077	1
Alphaproteobacterium_ALCH-64	o__Rhizobiales	89.62	0	0	2256334	124	26602	62.5655	0.880607	12
Alphaproteobacterium_ALCH-66	o__Rhizobiales	95.15	0	0	3288121	113	49224	62.102	0.922739	17
Alphaproteobacterium_ALCH-67	o__Caulobacterales	95.54	0	0	3041733	140	32694	64.6074	0.966742	15
Alphaproteobacterium_ALCH-68	o__Rhodobacterales	100	0	0	3815134	30	231811	70.7097	0.911228	17
Alphaproteobacterium_ALCH-69	o__Rhizobiales	95.95	0	0	3064740	45	125318	57.2526	0.930982	2
Alphaproteobacterium_ALCH-08	o__Rickettsiales	83.45	0.68	0	1158325	164	8091	30.3263	0.756974	0
Alphaproteobacterium_ALCH-09	o__Rickettsiales	73.65	1.01	0	1064388	152	7704	33.1838	0.851474	0
Alphaproteobacterium_ALG-ZAB-024	o__Acetobacterales	84.46	0.36	100	3594924	356	15071	72.8711	0.860475	17
Alphaproteobacterium_ALG-ZAB-073	o__Caulobacterales	95.61	0	0	3044604	120	43556	63.8635	0.987369	15
Alphaproteobacterium_ALG-ZAB-075	o__Rhodobacterales	97.97	1.01	0	3442253	89	58819	66.3655	0.960399	17
Alphaproteobacterium_ALG-ZAB-152	o__Acetobacterales	90.64	3.67	9.09	4182336	345	18443	69.5206	0.788767	9
Alphaproteobacterium_ALG-ZAB-164	o__Acetobacterales	73.46	1.35	33.33	2975824	478	7154	73.2713	0.945429	17
Alphaproteobacterium_ALG-ZAB-166	o__Sphingomonadales	93.34	0	0	2444156	185	18937	69.8967	0.884684	15
Alphaproteobacterium_ALG-ZAB-175	o__Acetobacterales	86.78	1.35	100	3501891	346	13329	72.4956	0.947352	12
Alphaproteobacterium_ALG-ZAB-180	o__Rhodobacterales	80.2	7.69	40	2730853	404	7855	61.6298	0.9888	13
Alphaproteobacterium_ALG-ZAB-195	o__Acetobacterales	93.49	2.03	66.67	3444475	211	24441	73.5355	0.839059	17
Alphaproteobacterium_ALG-ZAB-199	o__Azospirillales	100	1.01	0	3961281	64	177992	67.3314	0.886149	17
Alphaproteobacterium_ALG-ZAB-205	o__Geminicoccales	93	2.76	20	4242453	303	21206	70.2495	0.850059	16
Alphaproteobacterium_ALG-ZAB-208	o__Acetobacterales	64.27	0.36	50	2568549	404	7304	72.8886	0.943853	7
Alphaproteobacterium_ALG-ZAB-209	o__Caulobacterales	99.32	4.05	0	3151832	55	375465	65.258	0.866375	17
Alphaproteobacterium_ALG-ZAB-219	o__Dongiales	85.81	1.69	33.33	4186489	460	11581	69.9783	0.699631	2
Alphaproteobacterium_ALG-ZAB-251	o__Rhodospirillales	88.42	1.69	0	3314521	193	28972	68.2028	0.870937	1
Alphaproteobacterium_ALG-ZAB-266	o__Rhizobiales	97.97	1.01	100	3670642	188	29531	63.6209	0.949373	0
Alphaproteobacterium_ALG-ZAB-270	o__Geminicoccales	61.1	1.35	0	2861370	515	6097	71.7949	0.792895	13
Alphaproteobacterium_ALG-ZAB-296	o__Parvibaculales	98.59	0.68	0	2995211	97	55824	62.9627	0.942027	1
Alphaproteobacterium_ALG-ZAB-313	o__Acetobacterales	91.3	0.34	100	3549025	157	40341	71.8932	0.854713	17
Alphaproteobacterium_ALG-ZAB-320	o__Sphingomonadales	93.87	0.68	0	2234717	287	9289	71.7063	0.846687	15
Alphaproteobacterium_ALG-ZAB-322	o__Sphingomonadales	93.92	0	0	2419356	111	34015	70.1143	0.886625	15
Alphaproteobacterium_ALG-ZAB-328	o__Caulobacterales	97.97	1.69	0	3598580	158	49973	64.3506	0.958673	1
Alphaproteobacterium_ANTA-018	o__Sphingomonadales	66.39	0.34	100	2202232	403	6112	62.561	0.929435	11
Alphaproteobacterium_ANTA-023	o__Sphingomonadales	88.46	0.02	100	2584916	356	8783	59.8631	0.948717	13
Alphaproteobacterium_ANTA-031	o__Sphingomonadales	86.78	1.35	50	2757139	323	11160	62.7855	0.971221	15
Alphaproteobacterium_ANTA-040	o__Sphingomonadales	99.32	0.34	100	2481261	45	117768	67.6106	0.843794	15
Alphaproteobacterium_ANTA-044	o__Caulobacterales	94.59	0.34	100	2690020	179	22801	67.5562	0.984905	15
Alphaproteobacterium_ANTA-049	o__Sphingomonadales	89.1	0.7	0	3556851	416	10455	68.0016	0.951158	16
Alphaproteobacterium_ANTA-077	o__Acetobacterales	81.48	1.35	100	3412484	472	8823	68.2498	0.865691	15
Alphaproteobacterium_ANTA-080	o__Caulobacterales	99.32	0	0	3412848	48	93739	65.6792	0.871049	15
Alphaproteobacterium_ANTA-082	o__Rhodobacterales	95.1	3.38	20	3774204	412	12134	63.6004	0.966087	14
Alphaproteobacterium_BAIK-034	o__Dongiales	70.34	1.37	0	2361788	460	5580	66.538	0.707552	0
Alphaproteobacterium_BAIK-047	o__Rhizobiales	74.9	1.16	60	1774135	364	5398	64.2501	0.944788	1
Alphaproteobacterium_CHIP-013	o__Rhodobacterales	62.85	2.36	75	2478542	549	4793	65.4608	0.972409	1
Alphaproteobacterium_CHIP-028	o__Kiloniellales	57.88	0.9	50	1891938	448	4200	60.71	N/A	2
Alphaproteobacterium_CHIP-029	o__Rhodobacterales	84.8	2.18	20	3593726	610	6729	71.6729	0.971299	16
Alphaproteobacterium_CHIP-033	o__Rhodobacterales	74.12	2.36	50	2461962	438	6326	63.5162	0.991583	0
Alphaproteobacterium_CHIP-046	o__Rhodobacterales	97.61	9.17	66.67	3976831	345	20225	65.7629	0.994254	15
Alphaproteobacterium_CHIP-068	o__Rhodobacterales	93.09	3.38	40	3170953	198	21881	70.49	0.953618	14
Alphaproteobacterium_CHIP-073	o__Caulobacterales	97.97	0	0	2774027	49	78244	66.0925	0.928936	1
Alphaproteobacterium_CHIP-079	o__Rhodobacterales	82.76	2.25	37.5	3521130	430	10571	66.719	0.993852	14
Alphaproteobacterium_CHIP-085	o__Rhodobacterales	64.63	0.57	0	2413772	474	5458	68.8537	0.976205	9
Alphaproteobacterium_CHIP-093	o__Rhizobiales	71.34	0.68	100	3224569	564	6495	64.7921	0.994462	1
Alphaproteobacterium_CHIP-100	o__Rhodobacterales	87.54	2.39	40	3106575	399	9854	65.2585	0.98407	15
Alphaproteobacterium_CHIP-119	o__Geminicoccales	67.86	2.03	33.33	2441913	520	4946	71.1425	0.739319	17
Alphaproteobacterium_CHIP-120	o__Rhodobacterales	88.85	2.14	37.5	3264191	426	9384	67.5286	0.921075	15
Alphaproteobacterium_CHIP-131	o__Rhodobacterales	97.54	3.72	0	3538593	142	43300	69.7475	0.915204	17
Alphaproteobacterium_CHIP-149	o__Rhodobacterales	94.89	1.04	66.67	3124150	363	10686	66.0855	0.983316	2
Alphaproteobacterium_CHIP-151	o__Geminicoccales	82.15	4.95	44.44	4090282	473	10572	71.4372	0.740342	14
Alphaproteobacterium_CHIP-157	o__Caulobacterales	95.27	0.68	0	2893528	193	21530	67.8811	0.955859	15
Alphaproteobacterium_CHIP-168	o__Geminicoccales	77.64	4.28	22.22	3614360	466	9327	71.7176	0.741095	14
Alphaproteobacterium_CHIP-178	o__Rhizobiales	96.28	0.68	0	2555463	145	27351	65.6513	0.807808	17
Alphaproteobacterium_CHIP-184	o__Caulobacterales	89.01	1.35	50	2798258	378	8876	62.8167	0.872134	17
Alphaproteobacterium_CHIP-209	o__Rhodobacterales	77.18	2.03	0	3299110	543	6742	71.7593	N/A	14
Alphaproteobacterium_CHIP-260	o__Caulobacterales	97.97	0	0	3274072	49	92087	61.6826	0.935707	1
Alphaproteobacterium_CHIP-293	o__Rhodobacterales	86.74	1.24	0	2983018	302	13165	65.8282	0.976543	3
Alphaproteobacterium_LLAM-01	o__Rhizobiales	56.42	0.02	0	1669883	230	8402	63.9781	0.810627	12
Alphaproteobacterium_LLAM-11	o__UBA1280	66.5	1.35	0	915395	135	8333	50.227	0.677044	0
Alphaproteobacterium_LLAM-12	o__Micavibrionales	95.27	0	0	1931015	36	76454	46.3326	0.868377	0
Alphaproteobacterium_LLAM-13	o__Rickettsiales	98.65	0	0	1927282	26	156721	50.3289	0.639944	0
Alphaproteobacterium_LLAM-14	o__Rickettsiales	97.3	0.68	0	2305624	68	58895	51.7373	0.5686	0
Alphaproteobacterium_LLAM-15	o__Geminicoccales	96.62	1.35	0	4305371	84	90128	68.4801	0.789692	17
Alphaproteobacterium_LLAM-16	o__Geminicoccales	90.88	3.74	57.14	3382390	229	21567	70.6445	0.786145	17
Alphaproteobacterium_LLAM-17	o__Micavibrionales_C	60.25	0	0	2529211	479	5694	64.3146	0.769648	0
Alphaproteobacterium_LLAM-18	o__Caulobacterales	53.41	0.29	0	1894554	371	5725	56.6121	0.842845	15
Alphaproteobacterium_LLAM-21	o__Rhizobiales	75.72	0.68	100	1915153	312	7114	62.9095	0.80621	17
Alphaproteobacterium_LLAM-23-01	o__Kiloniellales	93.92	3.38	16.67	3768245	104	62417	69.8942	0.864249	0
Alphaproteobacterium_LLAM-24	o__Caulobacterales	72.57	0.34	0	2108282	287	8596	61.4557	0.932162	1
Alphaproteobacterium_LLAM-25	o__Caulobacterales	95.61	1.69	0	3057245	68	67816	66.4776	0.930268	15
Alphaproteobacterium_LLAM-26	o__Caulobacterales	95.27	0	0	2761293	56	85046	66.8719	0.926705	13
Alphaproteobacterium_LLAM-27	o__Rhizobiales	87.33	2.03	33.33	4654255	260	24932	73.1781	0.897131	12
Alphaproteobacterium_LLAM-29	o__Rhizobiales	64.9	0.68	100	1776391	251	8079	62.6205	0.807309	13
Alphaproteobacterium_LLAM-03	o__Rhizobiales	82.43	1.01	50	2251283	233	12989	63.6289	0.806313	13
Alphaproteobacterium_LLAM-30	o__Geminicoccales	89.43	3.38	12.5	3818874	219	27843	71.455	0.743256	17
Alphaproteobacterium_LLAM-31	o__Caulobacterales	80.41	0.08	100	2380512	229	14674	62.559	0.934493	1
Alphaproteobacterium_LLAM-32	o__Bin65	91.58	0.9	0	3501823	245	21156	69.1164	0.717444	1
Alphaproteobacterium_LLAM-33	o__Caulobacterales	87.91	0	0	2499960	246	13568	67.8625	0.899689	15
Alphaproteobacterium_LLAM-34	o__Micavibrionales	96.38	0	0	2426314	67	60656	56.0941	0.913492	0
Alphaproteobacterium_LLAM-35	o__Micavibrionales	96.62	1.58	0	2342347	69	61234	54.6392	0.865507	0
Alphaproteobacterium_LLAM-36	o__Caulobacterales	94.52	0.68	100	2814219	224	17684	64.7006	0.872386	15
Alphaproteobacterium_LLAM-37	o__Sphingomonadales	96.28	0.34	0	3104162	205	22206	67.3853	0.842731	15
Alphaproteobacterium_LLAM-38	o__Rhodospirillales	91.22	0.68	0	2637199	202	18560	67.483	0.676077	2
Alphaproteobacterium_LLAM-39	o__Rhodobacterales	97.97	1.01	0	4078329	138	44757	72.606	0.834005	17
Alphaproteobacterium_LLAM-04	o__Rhizobiales	83.97	2.03	50	2387288	132	26441	65.4053	0.806067	15
Alphaproteobacterium_LLAM-40	o__Azospirillales	97.64	0.68	50	4067771	149	39709	70.0216	0.803405	3
Alphaproteobacterium_LLAM-41-01	o__Rhodospirillales	91.22	1.35	33.33	3352602	70	82523	67.9907	0.719478	2
Alphaproteobacterium_LLAM-42	o__Sphingomonadales	100	0	0	3095530	10	1815448	60.967	0.708127	15
Alphaproteobacterium_LLAM-43-01	o__Rhodospirillales	98.99	1.01	0	3129313	79	57969	64.7846	0.714455	17
Alphaproteobacterium_LLAM-44	o__Micavibrionales_C	98.34	0	0	3044430	82	57646	62.2735	0.747245	15
Alphaproteobacterium_LLAM-45	o__Caulobacterales	93.58	0.68	100	2833735	58	73001	68.6642	0.938675	15
Alphaproteobacterium_LLAM-46	o__Rickettsiales	98.65	0	0	1978876	26	121528	57.14	0.819177	0
Alphaproteobacterium_LLAM-05	o__Rhizobiales	83.36	2.25	20	2733122	190	18380	63.6596	0.807889	17
Alphaproteobacterium_LLAM-07	o__Rhizobiales	67.32	1.37	20	3206384	543	6645	70.4262	0.948443	17
Alphaproteobacterium_LLAM-08	o__Kiloniellales	85.31	0.72	33.33	3410858	541	7185	68.6581	0.788513	13
Alphaproteobacterium_LLAM-09	o__Rhodobacterales	73.36	1.37	0	2967782	514	6640	71.8819	0.964406	16
