# Supplementary material for: A site-and-branch-heterogeneous model on an expanded dataset favor mitochondria as sister to known Alphaproteobacteria
Source: Research Square preprint supplement (doi:10.21203/rs.3.rs-557223/v1), 2021-05-28
Supplement: Supplementary file 9 [file 4b07abe89c3ce99781134100.xlsx]

## Sheet: Table S2
Table S2. Microbial mat and sediment metagenomes from which alphaproteobacterial MAGs were assembled in this study.
Metagenome	Ecosystem type	Site, geographical area	SRA accession number	BioProject	Reference
AL-N-1	Microbialite	Lake Alchichica North, Mexico	SRX1121942	PRJNA315555	Saghaï et al., (2016)
AL-N-5	Microbialite	Lake Alchichica North, Mexico	SRX1121944	PRJNA315555	Saghaï et al., (2016)
AL-N-10	Microbialite	Lake Alchichica North, Mexico	SRX1121946	PRJNA315555	Saghaï et al., (2016)
AL-N-15	Microbialite	Lake Alchichica North, Mexico	SRX1121948	PRJNA315555	Saghaï et al., (2016)
AL-W-1a	Microbialite	Lake Alchichica West, Mexico	SRX1121954	PRJNA315555	Saghaï et al., (2016)
AL-W-1b	Microbialite	Lake Alchichica West, Mexico	SRX1121959	PRJNA315555	Saghaï et al., (2016)
AL-W-1c	Microbialite	Lake Alchichica West, Mexico	SRX1121957	PRJNA315555	Saghaï et al., (2016)
LLA9-3_1	Microbial mat	Salar de Llamara, Chile	SAMN08688550	PRJNA438773	Gutierrez-Preciado et al., (2018)
LLA9-3_2	Microbial mat	Salar de Llamara, Chile	SAMN08688552	PRJNA438773	Gutierrez-Preciado et al., (2018)
LLA9-4_1	Microbial mat	Salar de Llamara, Chile	SAMN08688551	PRJNA438773	Gutierrez-Preciado et al., (2018)
LLA9-4_2	Microbial mat	Salar de Llamara, Chile	SAMN08688553	PRJNA438773	Gutierrez-Preciado et al., (2018)
LLA9-8	Microbial mat	Salar de Llamara, Chile	SAMN08688545	PRJNA438773	Gutierrez-Preciado et al., (2018)
LLA9-9_1	Microbial mat	Salar de Llamara, Chile	SAMN08688546	PRJNA438773	Gutierrez-Preciado et al., (2018)
LLA9-9_2	Microbial mat	Salar de Llamara, Chile	SAMN08688548	PRJNA438773	Gutierrez-Preciado et al., (2018)
LLA9-10_1	Microbial mat	Salar de Llamara, Chile	SAMN08688547	PRJNA438773	Gutierrez-Preciado et al., (2018)
LLA9-10_2	Microbial mat	Salar de Llamara, Chile	SAMN08688549	PRJNA438773	Gutierrez-Preciado et al., (2018)
LLA9-16	Microbial mat	Salar de Llamara, Chile	SAMN08688544	PRJNA438773	Gutierrez-Preciado et al., (2018)
LLA9-17	Microbial mat	Salar de Llamara, Chile	Under submission	PRJNA438773	This study
LLA9-21	Microbial mat	Salar de Llamara, Chile	SAMN08688543	PRJNA438773	Gutierrez-Preciado et al., (2018)
Chip−1a	Halophilic microbial mat	Salada de Chiprana, Spain	Under submission	Under submission	Gutierrez-Preciado et al., (in prep.)
Chip−1b	Halophilic microbial mat	Salada de Chiprana, Spain	Under submission	Under submission	Gutierrez-Preciado et al., (in prep.)
Chip−2a	Halophilic microbial mat	Salada de Chiprana, Spain	Under submission	Under submission	Gutierrez-Preciado et al., (in prep.)
Chip−2b	Halophilic microbial mat	Salada de Chiprana, Spain	Under submission	Under submission	Gutierrez-Preciado et al., (in prep.)
Chip−3a	Halophilic microbial mat	Salada de Chiprana, Spain	Under submission	Under submission	Gutierrez-Preciado et al., (in prep.)
Chip−3b	Halophilic microbial mat	Salada de Chiprana, Spain	Under submission	Under submission	Gutierrez-Preciado et al., (in prep.)
Chip−4a	Halophilic microbial mat	Salada de Chiprana, Spain	Under submission	Under submission	Gutierrez-Preciado et al., (in prep.)
Chip−4b	Halophilic microbial mat	Salada de Chiprana, Spain	Under submission	Under submission	Gutierrez-Preciado et al., (in prep.)
AntK1	Microbial mat	Antarctic lake	Under submission	Under submission	Gutierrez-Preciado et al., (in prep.)
AntK2	Microbial mat	Antarctic lake	Under submission	Under submission	Gutierrez-Preciado et al., (in prep.)
ALG	Brackish lake biofilm	Southern Siberia	Under submission	Under submission	Gutierrez-Preciado et al., (in prep.)
DAV	Thermophilic microbial mat	Lake Baikal area, Southern Siberia	Under submission	Under submission	Gutierrez-Preciado et al., (in prep.)
GOR_M1	Thermophilic microbial mat	Lake Baikal area, Southern Siberia	Under submission	Under submission	Gutierrez-Preciado et al., (in prep.)
GOR_M2	Thermophilic microbial mat	Lake Baikal area, Southern Siberia	Under submission	Under submission	Gutierrez-Preciado et al., (in prep.)
GOR_M3	Thermophilic microbial mat	Lake Baikal area, Southern Siberia	Under submission	Under submission	Gutierrez-Preciado et al., (in prep.)
GUS1	Thermophilic microbial mat	Lake Baikal area, Southern Siberia	Under submission	Under submission	Gutierrez-Preciado et al., (in prep.)
GUS2	Thermophilic microbial mat	Lake Baikal area, Southern Siberia	Under submission	Under submission	Gutierrez-Preciado et al., (in prep.)
KHA1	Thermophilic microbial mat	Lake Baikal area, Southern Siberia	Under submission	Under submission	Gutierrez-Preciado et al., (in prep.)
KHA2	Thermophilic microbial mat	Lake Baikal area, Southern Siberia	Under submission	Under submission	Gutierrez-Preciado et al., (in prep.)
KOT1	Thermophilic microbial mat	Lake Baikal area, Southern Siberia	Under submission	Under submission	Gutierrez-Preciado et al., (in prep.)
KOT3	Thermophilic microbial mat	Lake Baikal area, Southern Siberia	Under submission	Under submission	Gutierrez-Preciado et al., (in prep.)
ZAB1	Thermophilic microbial mat	Lake Baikal area, Southern Siberia	Under submission	Under submission	Gutierrez-Preciado et al., (in prep.)
ZAB2	Thermophilic microbial mat	Lake Baikal area, Southern Siberia	Under submission	Under submission	Gutierrez-Preciado et al., (in prep.)
BK03S	Sediment	Lake Baikal, Central basin	Under submission	PRJNA703749	Reboul et al., (in prep.)
BK05S	Sediment	Lake Baikal, Central basin	Under submission	PRJNA703749	Reboul et al., (in prep.)
BK16S	Sediment	Lake Baikal, Northern basin	Under submission	PRJNA703749	Reboul et al., (in prep.)
BK21S	Sediment	Lake Baikal, Northern basin	Under submission	PRJNA703749	Reboul et al., (in prep.)
BK22S	Sediment	Lake Baikal, Central basin	Under submission	PRJNA703749	Reboul et al., (in prep.)
BK25S	Sediment	Lake Baikal, Central basin	Under submission	PRJNA703749	Reboul et al., (in prep.)
BK26S	Sediment	Lake Baikal, Southern basin	Under submission	PRJNA703749	Reboul et al., (in prep.)
BK30S	Sediment	Lake Baikal, Southern basin	Under submission	PRJNA703749	Reboul et al., (in prep.)
