# Supplementary material for: A site-and-branch-heterogeneous model on an expanded dataset favor mitochondria as sister to known Alphaproteobacteria
Source: Research Square preprint supplement (doi:10.21203/rs.3.rs-557223/v1), 2021-05-28
Supplement: Supplementary file 10 [file 71a2a8da4b5b41141a6898b8.xlsx]

## Sheet: Table S1
Table S1. Functional annotations for the 108 genes of alphaproteobacterial origin in eukaryotes.
Number	Gene Name	Gene Name 2	Gene Name 3	mtdna %	ncdna %	Location	Functional Category	EggNOG Description	NCBI Summary/Annotations
001	21468	OXSM	OXSM	0	0.434783	nc	Branched-chain amino acid/fatty acid metabolism	Protein of unknown function (DUF455)	3-oxoacyl-acyl-carrier synthase-like protein (Protein of unknown function DUF455) [Arabidopsis thaliana]. sp|Q9NWU1|OXSM_HUMAN 3-oxoacyl-[acyl-carrier-protein] synthase, mitochondrial OS=Homo sapiens OX=9606 GN=OXSM PE=1 SV=1
002	778	SDHAF2	SDHAF2	0	0.782609	nc	Complex II subunit/assembly factor	Plays an essential role in the assembly of succinate dehydrogenase (SDH), an enzyme complex (also referred to as respiratory complex II) that is a component of both the tricarboxylic acid (TCA) cycle and the mitochondrial electron transport chain, and which couples the oxidation of succinate to fumarate with the reduction of ubiquinone (coenzyme Q) to ubiquinol. Required for flavinylation (covale…	RecName: Full=Succinate dehydrogenase assembly factor 2, mitochondrial; Short=SDH assembly factor 2; Short=SDHAF2; Flags: Precursor.
003	ATP4	atp4	atpF	0.347826	0	mt	Complex V subunit/assembly factor
004	ATP8	atp8	YMF19/atpF2	0.695652	0	mt	Complex V subunit/assembly factor
005	ATPA	atp1	ATP5F1A	0.608696	0.391304	ncmt	Complex V subunit/assembly factor	Produces ATP from ADP in the presence of a proton gradient across the membrane. The alpha chain is a regulatory subunit	ATP synthase subunit alpha, mitochondrial isoform a precursor [Homo sapiens]. ATP5F1A ATP synthase F1 subunit alpha [ Homo sapiens (human) ]. This gene encodes a subunit of mitochondrial ATP synthase. Mitochondrial ATP synthase catalyzes ATP synthesis, using an electrochemical gradient of protons across the inner membrane during oxidative phosphorylation. ATP synthase is composed of two linked mu…
006	ATPB	atp6	ATP6-2/atpB	0.956522	0	mt	Complex V subunit/assembly factor	ATP synthase A chain	ATPase subunit 4 (mitochondrion) [Arabidopsis thaliana]. atp4 ATPase subunit 4 [ Arabidopsis thaliana (thale cress) ]
007	ATPC	atpC/atp16	ATP16/ATP5F1D	0	0.956522	nc	Complex V subunit/assembly factor	ATP synthase, Delta/Epsilon chain, beta-sandwich domain	ATP synthase subunit delta, mitochondrial precursor [Homo sapiens]. ATP5F1D ATP synthase F1 subunit delta [ Homo sapiens (human) ]. This gene encodes a subunit of mitochondrial ATP synthase. Mitochondrial ATP synthase catalyzes ATP synthesis, utilizing an electrochemical gradient of protons across the inner membrane during oxidative phosphorylation. ATP synthase is composed of two linked multi-su…
008	ATPD	PDA1/PDHA2	PDA1/PDHA2	0	0.869565	nc	Pyruvate dehydrogenase complex subunit	The pyruvate dehydrogenase complex catalyzes the overall conversion of pyruvate to acetyl-CoA and CO(2)	pyruvate dehydrogenase E1 component subunit alpha, testis-specific form, mitochondrial precursor [Homo sapiens]. PDHA2 pyruvate dehydrogenase E1 alpha 2 subunit [ Homo sapiens (human) ]
009	ATPE	atp9	ATP5MC2/ATP9	0.826087	0.0434783	ncmt	Complex V subunit/assembly factor	ATP hydrolysis coupled proton transport	ATP synthase F(0) complex subunit C2, mitochondrial isoform d [Homo sapiens]. ATP5MC2 ATP synthase membrane subunit c locus 2 [ Homo sapiens (human) ]. This gene encodes a subunit of mitochondrial ATP synthase. Mitochondrial ATP synthase catalyzes ATP synthesis, utilizing an electrochemical gradient of protons across the inner membrane during oxidative phosphorylation. ATP synthase is composed of…
010	ATPG	atp3	ATP5F1C/atpG	0.217391	0.782609	ncmt	Complex V subunit/assembly factor	proton-transporting ATP synthase activity, rotational mechanism	ATP synthase subunit gamma, mitochondrial isoform L (liver) precursor [Homo sapiens]. ATP5F1C ATP synthase F1 subunit gamma [ Homo sapiens (human) ]. This gene encodes a subunit of mitochondrial ATP synthase. Mitochondrial ATP synthase catalyzes ATP synthesis, utilizing an electrochemical gradient of protons across the inner membrane during oxidative phosphorylation. ATP synthase is composed of t…
011	ATPH	atpH/atp5	ATP5PO	0	0.869565	nc	Complex V subunit/assembly factor	proton-transporting ATP synthase activity, rotational mechanism	ATP synthase subunit O, mitochondrial precursor [Homo sapiens]. ATP5PO ATP synthase peripheral stalk subunit OSCP [ Homo sapiens (human) ]. The protein encoded by this gene is a component of the F-type ATPase found in the mitochondrial matrix. F-type ATPases are composed of a catalytic core and a membrane proton channel. The encoded protein appears to be part of the connector linking these two co…
012	BIOC	NDUFAF5	NDUFAF5	0	0.73913	nc	Complex I subunit/assembly factor	Methyltransferase	arginine-hydroxylase NDUFAF5, mitochondrial isoform 1 [Homo sapiens]. NDUFAF5 NADH:ubiquinone oxidoreductase complex assembly factor 5 [ Homo sapiens (human) ]. The NADH-ubiquinone oxidoreductase complex (complex I) of the mitochondrial respiratory chain catalyzes the transfer of electrons from NADH to ubiquinone, and consists of at least 43 subunits. The complex is located in the inner mitochond…
013	CCMF	ccmF	ccmF	0.521739	0	mt	Cytochrome c biogenesis	COG1138 Cytochrome c biogenesis factor	cytochrome c biogenesis FN2, partial (mitochondrion) [Arabidopsis thaliana]. ccmFN2 cytochrome c biogenesis FN2 [ Arabidopsis thaliana (thale cress) ]
014	CLPP	CLPP	CLPP	0	0.652174	nc	Clp protease complex subunit	Cleaves peptides in various proteins in a process that requires ATP hydrolysis. Has a chymotrypsin-like activity. Plays a major role in the degradation of misfolded proteins	ATP-dependent Clp protease proteolytic subunit, mitochondrial precursor [Homo sapiens]. CLPP caseinolytic mitochondrial matrix peptidase proteolytic subunit [ Homo sapiens (human) ]. The protein encoded by this gene belongs to the peptidase family S14 and hydrolyzes proteins into small peptides in the presence of ATP and magnesium. The protein is transported into mitochondrial matrix and is assoc…
015	COQ7	COQ7	COQ7	0	0.304348	nc	Ubiquinone biosynthesis	Catalyzes the hydroxylation of 2-polyprenyl-3-methyl-6- methoxy-1,4-benzoquinol (DMQH2) during ubiquinone biosynthesis. Has also a structural role in the COQ enzyme complex, stabilizing other COQ polypeptides. Involved in lifespan determination in a ubiquinone-independent manner	5-demethoxyubiquinone hydroxylase, mitochondrial isoform 2 [Homo sapiens]. COQ7 coenzyme Q7, hydroxylase [ Homo sapiens (human) ]. The protein encoded by this gene is similar to a mitochondrial di-iron containing hydroxylase in Saccharomyces cerevisiae that is involved with ubiquinone biosynthesis. Mutations in the yeast gene lead to slower development and longer life span. Alternatively spliced …
016	COX11	COX11	COX11	0.217391	0.695652	ncmt	Complex IV subunit/assembly factor	cytochrome c oxidase assembly	cytochrome c oxidase assembly protein COX11, mitochondrial isoform 1 [Homo sapiens]. COX11 cytochrome c oxidase copper chaperone COX11 [ Homo sapiens (human) ]. Cytochrome c oxidase (COX), the terminal component of the mitochondrial respiratory chain, catalyzes the electron transfer from reduced cytochrome c to oxygen. This component is a heteromeric complex consisting of 3 catalytic subunits enc…
017	COX15	COX15	COX15	0	0.695652	nc	Complex IV subunit/assembly factor	Cytochrome c oxidase assembly protein	COX15 cytochrome c oxidase assembly homolog COX15 [ Homo sapiens (human) ]. Cytochrome c oxidase (COX), the terminal component of the mitochondrial respiratory chain, catalyzes the electron transfer from reduced cytochrome c to oxygen. This component is a heteromeric complex consisting of 3 catalytic subunits encoded by mitochondrial genes and multiple structural subunits encoded by nuclear genes…
018	COXA	COX1	COX1	1	0	mt	Complex IV subunit/assembly factor	Cytochrome C and Quinol oxidase polypeptide I	cytochrome c oxidase subunit 1 (mitochondrion) [Saccharomyces cerevisiae YJM969]. cytochrome c oxidase subunit I (mitochondrion) [Homo sapiens]. cox1 cytochrome c oxidase subunit 1 [ Arabidopsis thaliana (thale cress) ]
019	COXB	COX2	COX2	0.956522	0.0434783	ncmt	Complex IV subunit/assembly factor	Cytochrome C oxidase subunit II, periplasmic domain	cytchrome c oxidase sububnit 2 (mitochondrion) [Saccharomyces cerevisiae]. cox2 cytchrome c oxidase sububnit 2 [ Saccharomyces cerevisiae (baker's yeast) ]
020	COXC	COX3	COX3	0.913043	0	mt	Complex IV subunit/assembly factor	Subunits I, II and III form the functional core of the enzyme complex	cytochrome c oxidase subunit 3 (mitochondrion) [Arabidopsis thaliana]. cox3 cytochrome c oxidase subunit 3 [ Arabidopsis thaliana (thale cress) ]. cytochrome c oxidase subunit III (mitochondrion) [Homo sapiens]
021	CRTB	NDUFAF6	NDUFAF6	0	0.73913	nc	Complex I subunit/assembly factor	mitochondrial respiratory chain complex I assembly	AT1G62730 Terpenoid synthases superfamily protein [ Arabidopsis thaliana (thale cress) ]. NADH dehydrogenase (ubiquinone) complex I, assembly factor 6 isoform 1 precursor [Homo sapiens]. NDUFAF6 NADH:ubiquinone oxidoreductase complex assembly factor 6 [ Homo sapiens (human) ]. This gene encodes a protein that localizes to mitochondria and contains a predicted phytoene synthase domain. The encoded…
022	DLD	DLD1	DLD1	0	0.652174	nc	D-lactate dehydrogenase (respiratory chain)	FAD linked oxidases, C-terminal domain	probable D-lactate dehydrogenase, mitochondrial isoform 2 precursor [Homo sapiens]. LDHD lactate dehydrogenase D [ Homo sapiens (human) ]. The protein encoded by this gene belongs to the D-isomer specific 2-hydroxyacid dehydrogenase family. The similar protein in yeast has both D-lactate and D-glycerate dehydrogenase activities. Alternative splicing occurs at this locus and two transcript variant…
023	DNAK	mt-HSP70/dnaK	mt-HSP70/dnaK	0	0.826087	nc	Iron-sulfur cluster biogenesis	Heat shock 70 kDa protein	stress-70 protein, mitochondrial precursor [Homo sapiens]. HSPA9 heat shock protein family A (Hsp70) member 9 [ Homo sapiens (human) ]. This gene encodes a member of the heat shock protein 70 gene family. The encoded protein is primarily localized to the mitochondria but is also found in the endoplasmic reticulum, plasma membrane and cytoplasmic vesicles. This protein is a heat-shock cognate prot…
024	ENGA	engA	engA	0	0.391304	nc	tRNA modification/maturation	GTP-binding protein engA. Source PGD	Mss1p [Saccharomyces cerevisiae S288C]. MSS1 Mss1p [ Saccharomyces cerevisiae S288C ]. Mitochondrial protein; forms a heterodimer complex with Mto1p that performs the 5-carboxymethylaminomethyl modification of the wobble uridine base in mitochondrial tRNAs; similar to human GTPBP3. trmE; trmE is a tRNA modification GTPase. MnmE; tRNA U34 5-carboxymethylaminomethyl modifying GTPase MnmE/TrmE [Tran…
025	ERPA	ISCA2	ISCA2	0	0.652174	nc	Iron-sulfur cluster biogenesis	Iron-sulfur cluster assembly 2	Iron-sulfur cluster assembly 2 homolog (S. cerevisiae) [Homo sapiens]. ISCA2 iron-sulfur cluster assembly 2 [ Homo sapiens (human) ]. The protein encoded by this gene is an A-type iron-sulfur cluster (ISC) protein found in mitochondria. The encoded protein appears to be involved in the maturation of mitochondrial iron-sulfur proteins. Two transcript variants encoding different isoforms have been …
026	FADE	ACAD8	ACAD8	0	0.521739	nc	Branched-chain amino acid/fatty acid metabolism	COG1960 Acyl-CoA dehydrogenases	isobutyryl-CoA dehydrogenase, mitochondrial [Homo sapiens]. ACAD8 acyl-CoA dehydrogenase family member 8 [ Homo sapiens (human) ]. This gene encodes a member of the acyl-CoA dehydrogenase family of enzymes that catalyze the dehydrogenation of acyl-CoA derivatives in the metabolism of fatty acids or branch chained amino acids. The encoded protein is a mitochondrial enzyme that functions in catabol…
027	FTSZ	ftsZ	ftsZ	0	0.217391	nc	Mitochondrial division	Essential cell division protein that forms a contractile ring structure (Z ring) at the future cell division site. The regulation of the ring assembly controls the timing and the location of cell division. One of the functions of the FtsZ ring is to recruit other cell division proteins to the septum to produce a new cell wall between the dividing cells. Binds GTP and shows GTPase activity	mitochondrial cell division protein [Dictyostelium discoideum AX4]. fszA mitochondrial cell division protein [ Dictyostelium discoideum AX4 ]
028	FUMC	FUM1	FUM1	0	0.73913	nc	Krebs cycle	Fumarate hydratase, mitochondrial	FH fumarate hydratase [ Homo sapiens (human) ]. fumarate hydratase, mitochondrial isoform X1. The protein encoded by this gene is an enzymatic component of the tricarboxylic acid (TCA) cycle, or Krebs cycle, and catalyzes the formation of L-malate from fumarate. It exists in both a cytosolic form and an N-terminal extended form, differing only in the translation start site used. The N-terminal ex…
029	GATB	gatB	gatB	0	0.521739	nc	tRNA modification/maturation	Allows the formation of correctly charged Asn-tRNA(Asn) or Gln-tRNA(Gln) through the transamidation of misacylated Asp- tRNA(Asn) or Glu-tRNA(Gln) in organisms which lack either or both of asparaginyl-tRNA or glutaminyl-tRNA synthetases. The reaction takes place in the presence of glutamine and ATP through an activated phospho-Asp-tRNA(Asn) or phospho-Glu-tRNA(Gln)	glutamyl-tRNA(Gln) amidotransferase subunit B, mitochondrial isoform 2 precursor [Homo sapiens]. GATB glutamyl-tRNA amidotransferase subunit B [ Homo sapiens (human) ]. Also known as PET112; HSPC199; PET112L.
031	GROL	HSP60	HSP60	0	0.826087	nc	Protein import/export and folding/maturation (chaperone)	Belongs to the chaperonin (HSP60) family	60 kDa heat shock protein, mitochondrial [Homo sapiens]. HSPD1 heat shock protein family D (Hsp60) member 1 [ Homo sapiens (human) ]. This gene encodes a member of the chaperonin family. The encoded mitochondrial protein may function as a signaling molecule in the innate immune system. This protein is essential for the folding and assembly of newly imported proteins in the mitochondria. This gene…
032	GRPE	GRPEL1	GRPEL1	0	0.782609	nc	Protein import/export (PAM complex subunit)	adenyl-nucleotide exchange factor activity	GRPEL1 GrpE like 1, mitochondrial [ Homo sapiens (human) ]. Nucleotide exchange factor (NEF) for mHsp70 involved in mitochondrial protein import. doi: 10.1074/jbc.M117.788463
033	HEMN	RSAD1/hemN	RSAD1/hemN	0	0.217391	nc	tRNA modification/maturation (methylation)	Elongator protein 3, MiaB family, Radical SAM	radical S-adenosyl methionine domain-containing protein 1, mitochondrial precursor [Homo sapiens]. RSAD1 radical S-adenosyl methionine domain containing 1 [ Homo sapiens (human) ]. Also known as HemW
034	HSLU	hslU	hslU	0	0.695652	nc	Clp protease complex subunit	unfolded protein binding	ATP-dependent Clp protease ATP-binding subunit clpX-like, mitochondrial isoform X1 [Homo sapiens]. CLPX caseinolytic mitochondrial matrix peptidase chaperone subunit [ Homo sapiens (human) ]. The protein encoded by this gene is part of a protease found in mitochondria. This protease is ATP-dependent and targets specific proteins for degradation. The protease consists of two heptameric rings of th…
035	HSLV	hslV	hslV	0	0.565217	nc	Proteasome-like complex subunit	Protease subunit of a proteasome-like degradation complex believed to be a general protein degrading machinery	ATPdependent protease HslVU, peptidase subunit [Acanthamoeba castellanii str. Neff]. peptidase subunit of mitochondrial ATP-dependent protease hslUV [Chlamydomonas reinhardtii]
037	ISCS	NFS1	NFS1	0	0.913043	nc	Iron-sulfur cluster biogenesis	Beta-eliminating lyase	NFS1 NFS1 cysteine desulfurase [ Homo sapiens (human) ]. Iron-sulfur clusters are required for the function of many cellular enzymes. The proteins encoded by this gene supply inorganic sulfur to these clusters by removing the sulfur from cysteine, creating alanine in the process. This gene uses alternate in-frame translation initiation sites to generate mitochondrial forms and cytoplasmic/nuclear…
038	JAC1	HSCB	HSCB	0	0.73913	nc	Iron-sulfur cluster biogenesis	HSCB C-terminal oligomerisation domain	HSCB HscB mitochondrial iron-sulfur cluster cochaperone [ Homo sapiens (human) ]. This gene encodes a DnaJ-type co-chaperone and member of the heat shock cognate B (HscB) family of proteins. The encoded protein plays a role in the synthesis of iron-sulfur clusters, protein cofactors that are involved in the redox reactions of mitochondrial electron transport and other processes. Cells in which th…
039	KSGA	TFB1m/rsmA/ksgA	TFB1m/rsmA/ksgA	0	0.26087	nc	rRNA modification/maturation	Ribosomal RNA adenine dimethylases	dimethyladenosine transferase 1, mitochondrial isoform 1 [Homo sapiens]. TFB1M transcription factor B1, mitochondrial [ Homo sapiens (human) ]. The protein encoded by this gene is a dimethyltransferase that methylates the conserved stem loop of mitochondrial 12S rRNA. The encoded protein also is part of the basal mitochondrial transcription complex and is necessary for mitochondrial gene expressi…
040	LPDA	LPD1	LPD1	0	0.913043	nc	Pyruvate dehydrogenase complex subunit	Dihydrolipoyl dehydrogenase	Chain A, Dihydrolipoyl Dehydrogenase, Mitochondrial. Lpd1p [Saccharomyces cerevisiae YJM1252]. Dihydrolipoamide dehydrogenase; the lipoamide dehydrogenase component (E3) of the pyruvate dehydrogenase and 2-oxoglutarate dehydrogenase multi-enzyme complexes; PDH complex is concentrated in spots within the mitochondrial matrix, often near the ERMES complex and near peroxisomes; LPD1 has a paralog, I…
041	MATA	MLYCD	MLYCD	0	0.695652	nc	Branched-chain amino acid/fatty acid metabolism	Malonyl-CoA decarboxylase N-terminal domain	MLYCD malonyl-CoA decarboxylase [ Homo sapiens (human) ]. malonyl-CoA decarboxylase, mitochondrial. The product of this gene catalyzes the breakdown of malonyl-CoA to acetyl-CoA and carbon dioxide. Malonyl-CoA is an intermediate in fatty acid biosynthesis, and also inhibits the transport of fatty acyl CoAs into mitochondria. Consequently, the encoded protein acts to increase the rate of fatty aci…
042	METG	MARS2	MARS2	0	0.913043	nc	Aminoacyl-tRNA synthetase	Belongs to the class-I aminoacyl-tRNA synthetase family	methionine--tRNA ligase, mitochondrial precursor [Homo sapiens]. MARS2 methionyl-tRNA synthetase 2, mitochondrial [ Homo sapiens (human) ]. This gene produces a mitochondrial methionyl-tRNA synthetase protein that is encoded by the nuclear genome and imported to the mitochondrion. This protein likely functions as a monomer and is predicted to localize to the mitochondrial matrix. Mutations in thi…
043	MNMG	mnmG/gidA	mnmG/gidA	0	0.521739	nc	tRNA modification/maturation	NAD-binding protein involved in the addition of a carboxymethylaminomethyl (cmnm) group at the wobble position (U34) of certain tRNAs, forming tRNA-cmnm(5)s(2)U34	protein MTO1 homolog, mitochondrial isoform a [Homo sapiens]. MTO1 mitochondrial tRNA translation optimization 1 [ Homo sapiens (human) ]. This gene encodes a mitochondrial protein thought to be involved in mitochondrial tRNA modification. The encoded protein may also play a role in the expression of the non-syndromic and aminoglycoside-induced deafness phenotypes associated with a specific mutat…
044	MPP	PMPCB/MPPB/MAS1	PMPCB/MPPB/MAS1	0	1	nc	Protein import/export (MPP)	Insulinase (Peptidase family M16)	PMPCB peptidase, mitochondrial processing beta subunit [ Homo sapiens (human) ]. This gene is a member of the peptidase M16 family and encodes a protein with a zinc-binding motif. This protein is located in the mitochondrial matrix and catalyzes the cleavage of the leader peptides of precursor proteins newly imported into the mitochondria, though it only functions as part of a heterodimeric compl…
045	MRAW	rsmH/mraW	rsmH/mraW	0	0.347826	nc	rRNA modification/maturation	MraW methylase family	probable methyltransferase-like protein 15 isoform 1 [Homo sapiens]. METTL15 methyltransferase like 15 [ Homo sapiens (human) ]. 16S rRNA (cytosine(1402)-N(4))-methyltransferase RsmH [Neorhizobium sp. T6_25].
046	NDUFAF7	NDUFAF7	NDUFAF7	0	0.73913	nc	Complex I subunit/assembly factor	Arginine methyltransferase involved in the assembly or stability of mitochondrial NADH ubiquinone oxidoreductase complex (complex I)	protein arginine methyltransferase NDUFAF7, mitochondrial isoform X1 [Homo sapiens]. NDUFAF7 NADH:ubiquinone oxidoreductase complex assembly factor 7 [ Homo sapiens (human) ]. This gene encodes an assembly factor protein which helps in the assembly and stabilization of Complex I, a large multi-subunit enzyme in the mitochondrial respiratory chain. Complex I is involved in several physiological ac…
047	NDUFS4	NDUFS4	NDUFS4	0	0.73913	nc	Complex I subunit/assembly factor	nadh-ubiquinone oxidoreductase	NADH dehydrogenase [ubiquinone] iron-sulfur protein 4, mitochondrial isoform 1 precursor [Homo sapiens]. NDUFS4 NADH:ubiquinone oxidoreductase subunit S4 [ Homo sapiens (human) ]. This gene encodes an nuclear-encoded accessory subunit of the mitochondrial membrane respiratory chain NADH dehydrogenase (complex I, or NADH:ubiquinone oxidoreductase). Complex I removes electrons from NADH and passes …
048	NIFU	NFU1	NFU1	0	0.869565	nc	Iron-sulfur cluster biogenesis	Bromodomain extra-terminal - transcription regulation	NFU1 iron-sulfur cluster scaffold homolog, mitochondrial isoform 1 [Homo sapiens]. NFU1 NFU1 iron-sulfur cluster scaffold [ Homo sapiens (human) ]. This gene encodes a protein that is localized to mitochondria and plays a critical role in iron-sulfur cluster biogenesis. The encoded protein assembles and transfers 4Fe-4S clusters to target apoproteins including succinate dehydrogenase and lipoic a…
049	NUOA	nad3	nad3/nuoA	0.913043	0	mt	Complex I subunit/assembly factor	NDH-1 shuttles electrons from NADH, via FMN and iron- sulfur (Fe-S) centers, to quinones in the respiratory chain. The immediate electron acceptor for the enzyme in this species is believed to be ubiquinone. Couples the redox reaction to proton translocation (for every two electrons transferred, four hydrogen ions are translocated across the cytoplasmic membrane), and thus conserves the redox ene…	NADH dehydrogenase subunit 3 (mitochondrion) [Homo sapiens]
050	NUOB	NDUFS7	NDUFS7	0.304348	0.565217	ncmt	Complex I subunit/assembly factor	Belongs to the complex I 20 kDa subunit family	NADH dehydrogenase (ubiquinone) Fe-S protein 7, 20kDa (NADH-coenzyme Q reductase), isoform CRA_b, partial [Homo sapiens]. NDUFS7 NADH:ubiquinone oxidoreductase core subunit S7 [ Homo sapiens (human) ]. This gene encodes a protein that is a subunit of one of the complexes that forms the mitochondrial respiratory chain. This protein is one of over 40 subunits found in complex I, the nicotinamide ad…
051	NUOC	NDUFS3/nuoC	NDUFS3/nuoC	0.782609	0.173913	ncmt	Complex I subunit/assembly factor	NADH dehydrogenase ubiquinone iron-sulfur protein 3	NADH dehydrogenase [ubiquinone] iron-sulfur protein 3, mitochondrial precursor [Homo sapiens]. NDUFS3 NADH:ubiquinone oxidoreductase core subunit S3 [ Homo sapiens (human) ]. This gene encodes one of the iron-sulfur protein (IP) components of mitochondrial NADH:ubiquinone oxidoreductase (complex I). Mutations in this gene are associated with Leigh syndrome resulting from mitochondrial complex I d…
052	NUOD	nad7	nad7	0.695652	0.173913	ncmt	Complex I subunit/assembly factor	Belongs to the complex I 49 kDa subunit family	NADH dehydrogenase [ubiquinone] iron-sulfur protein 2, mitochondrial isoform 1 precursor [Homo sapiens]. NDUFS2 NADH:ubiquinone oxidoreductase core subunit S2 [ Homo sapiens (human) ]. The protein encoded by this gene is a core subunit of the mitochondrial membrane respiratory chain NADH dehydrogenase (complex I). Mammalian mitochondrial complex I is composed of at least 43 different subunits, 7 …
053	NUOE	NDUFV2	NDUFV2	0	0.826087	nc	Complex I subunit/assembly factor	NADH dehydrogenase (quinone) activity	NDUFV2 NADH:ubiquinone oxidoreductase core subunit V2 [ Homo sapiens (human) ]. The NADH-ubiquinone oxidoreductase complex (complex I) of the mitochondrial respiratory chain catalyzes the transfer of electrons from NADH to ubiquinone, and consists of at least 43 subunits. The complex is located in the inner mitochondrial membrane. This gene encodes the 24 kDa subunit of complex I, and is involved…
054	NUOF	NDUFV1	NDUFV1	0	0.913043	nc	Complex I subunit/assembly factor	Core subunit of the mitochondrial membrane respiratory chain NADH dehydrogenase (Complex I) that is believed to belong to the minimal assembly required for catalysis. Complex I functions in the transfer of electrons from NADH to the respiratory chain	NADH dehydrogenase [ubiquinone] flavoprotein 1, mitochondrial isoform 1 precursor [Homo sapiens]. NDUFV1 NADH:ubiquinone oxidoreductase core subunit V1 [ Homo sapiens (human) ]. The mitochondrial respiratory chain provides energy to cells via oxidative phosphorylation and consists of four membrane-bound electron-transporting protein complexes (I-IV) and an ATP synthase (complex V). This gene enco…
055	NUOG	NDUFS1	NDUFS1	0.478261	0.391304	ncmt	Complex I subunit/assembly factor	apoptotic mitochondrial changes	NADH-ubiquinone oxidoreductase 75 kDa subunit, mitochondrial isoform 1 precursor [Homo sapiens]. NDUFS1 NADH:ubiquinone oxidoreductase core subunit S1 [ Homo sapiens (human) ]. The protein encoded by this gene belongs to the complex I 75 kDa subunit family. Mammalian complex I is composed of 45 different subunits. It locates at the mitochondrial inner membrane. This protein has NADH dehydrogenase…
056	NUOH	nad1	nad1	0.956522	0	mt	Complex I subunit/assembly factor	NDH-1 shuttles electrons from NADH, via FMN and iron- sulfur (Fe-S) centers, to quinones in the respiratory chain. The immediate electron acceptor for the enzyme in this species is believed to be ubiquinone. Couples the redox reaction to proton translocation (for every two electrons transferred, four hydrogen ions are translocated across the cytoplasmic membrane), and thus conserves the redox ene…	NADH dehydrogenase subunit 1 (mitochondrion) [Homo sapiens]
057	NUOI	nad8	nad8	0.304348	0.608696	ncmt	Complex I subunit/assembly factor	NADH dehydrogenase ubiquinone iron-sulfur protein 8	NADH dehydrogenase [ubiquinone] iron-sulfur protein 8, mitochondrial precursor [Homo sapiens]. This gene encodes a subunit of mitochondrial NADH:ubiquinone oxidoreductase, or Complex I, a multimeric enzyme of the respiratory chain responsible for NADH oxidation, ubiquinone reduction, and the ejection of protons from mitochondria. The encoded protein is involved in the binding of two of the six to…
058	NUOJ	nad6	nad6	0.869565	0	mt	Complex I subunit/assembly factor	Belongs to the complex I subunit 6 family	NADH dehydrogenase subunit 6 (mitochondrion) [Arabidopsis thaliana]. nad6 NADH dehydrogenase subunit 6 [ Arabidopsis thaliana (thale cress) ]
059	NUOK	nad4L	nad4L/nuoK1	0.869565	0.0869565	ncmt	Complex I subunit/assembly factor	NDH-1 shuttles electrons from NADH, via FMN and iron- sulfur (Fe-S) centers, to quinones in the respiratory chain. The immediate electron acceptor for the enzyme in this species is believed to be ubiquinone. Couples the redox reaction to proton translocation (for every two electrons transferred, four hydrogen ions are translocated across the cytoplasmic membrane), and thus conserves the redox ene…	NADH dehydrogenase subunit 4L, partial (mitochondrion) [Arabidopsis thaliana]
060	NUOL	nad5	nad5	0.956522	0	mt	Complex I subunit/assembly factor	NADH-Ubiquinone oxidoreductase (complex I), chain 5 N-terminus	NADH dehydrogenase subunit 5, partial (mitochondrion) [Homo sapiens]
061	NUOM	nad4	nad4/ND4	0.956522	0	mt	Complex I subunit/assembly factor	Core subunit of the mitochondrial membrane respiratory chain NADH dehydrogenase (Complex I) that is believed to belong to the minimal assembly required for catalysis. Complex I functions in the transfer of electrons from NADH to the respiratory chain. The immediate electron acceptor for the enzyme is believed to be ubiquinone (By similarity)	NADH dehydrogenase subunit 4 (mitochondrion) [Homo sapiens]
062	NUON	nad2	nad2/nuoN	0.869565	0.0434783	ncmt	Complex I subunit/assembly factor	ATP synthesis coupled electron transport	NADH dehydrogenase subunit 2 (mitochondrion) [Homo sapiens]
063	PAM18	PAM18/TIM14	PAM18/TIM14	0	0.869565	nc	Protein import/export (PAM complex subunit)	protein transport	mitochondrial import inner membrane translocase subunit TIM14 isoform 1 [Homo sapiens]. DNAJC19 DnaJ heat shock protein family (Hsp40) member C19 [ Homo sapiens (human) ]. The protein encoded by this gene is thought to be part of a complex involved in the ATP-dependent transport of transit peptide-containing proteins from the inner cell membrane to the mitochondrial matrix. Defects in this gene a…
064	PCCB	PCCB	PCCB	0	0.826087	nc	Branched-chain amino acid/fatty acid metabolism	Carboxyl transferase domain	propionyl-CoA carboxylase beta chain, mitochondrial isoform 1 precursor [Homo sapiens]. The protein encoded by this gene is a subunit of the propionyl-CoA carboxylase (PCC) enzyme, which is involved in the catabolism of propionyl-CoA. PCC is a mitochondrial enzyme that probably acts as a dodecamer of six alpha subunits and six beta subunits. This gene encodes the beta subunit of PCC. Defects in t…
065	PDHA	ATP2/ATP5F1B	ATP2/ATP5F1B	0	0.956522	nc	Complex V subunit/assembly factor	proton-transporting ATP synthase activity, rotational mechanism	ATP synthase subunit beta, mitochondrial precursor [Homo sapiens]. ATP5F1B ATP synthase F1 subunit beta [ Homo sapiens (human) ]. This gene encodes a subunit of mitochondrial ATP synthase. Mitochondrial ATP synthase catalyzes ATP synthesis, utilizing an electrochemical gradient of protons across the inner membrane during oxidative phosphorylation. ATP synthase is composed of two linked multi-subu…
066	PDHB	PDHE1-B	PDHE1-B	0	0.956522	nc	Pyruvate dehydrogenase complex subunit	pyruvate dehydrogenase (acetyl-transferring) activity	PDHB pyruvate dehydrogenase E1 beta subunit [ Homo sapiens (human) ]. pyruvate dehydrogenase E1 component subunit beta, mitochondrial isoform 1. The pyruvate dehydrogenase (PDH) complex is a nuclear-encoded mitochondrial multienzyme complex that catalyzes the overall conversion of pyruvate to acetyl-CoA and carbon dioxide, and provides the primary link between glycolysis and the tricarboxylic aci…
067	PDHC	DLTA	DLTA	0	0.73913	nc	Pyruvate dehydrogenase complex subunit	dihydrolipoyllysine-residue acetyltransferase activity	dihydrolipoyllysine-residue acetyltransferase component of pyruvate dehydrogenase complex, mitochondrial isoform 10 [Homo sapiens]. DLAT dihydrolipoamide S-acetyltransferase [ Homo sapiens (human) ]. This gene encodes component E2 of the multi-enzyme pyruvate dehydrogenase complex (PDC). PDC resides in the inner mitochondrial membrane and catalyzes the conversion of pyruvate to acetyl coenzyme A.…
068	PETA	RIP1	RIP1	0	0.956522	nc	Complex III subunit/assembly factor	Component of the ubiquinol-cytochrome c reductase complex (complex III or cytochrome b-c1 complex), which is a respiratory chain that generates an electrochemical potential coupled to ATP synthesis	UQCRFS1 ubiquinol-cytochrome c reductase, Rieske iron-sulfur polypeptide 1 [ Homo sapiens (human) ]. Rieske iron-sulfur protein Rieske protein UQCRFS1 complex III subunit 5 cytochrome b-c1 complex subunit 5 epididymis secretory sperm binding protein ubiquinol-cytochrome c reductase iron-sulfur subunit.
069	PETB	cob	cob	1	0	mt	Complex III subunit/assembly factor	Component of the ubiquinol-cytochrome c reductase complex (complex III or cytochrome b-c1 complex) that is part of the mitochondrial respiratory chain. The b-c1 complex mediates electron transfer from ubiquinol to cytochrome c. Contributes to the generation of a proton gradient across the mitochondrial membrane that is then used for ATP synthesis	cytochrome b (mitochondrion) [Saccharomyces cerevisiae S288C]. COB cytochrome b [ Saccharomyces cerevisiae S288C ].
070	PETC	CYT1	CYT1	0	0.956522	nc	Complex III subunit/assembly factor	heme protein	CYC1 cytochrome c1 [ Homo sapiens (human) ]. cytochrome c1, heme protein, mitochondrial isoform X2 [Homo sapiens]. This gene encodes a subunit of the cytochrome bc1 complex, which plays an important role in the mitochondrial respiratory chain by transferring electrons from the Rieske iron-sulfur protein to cytochrome c. Mutations in this gene may cause mitochondrial complex III deficiency, nuclea…
071	PRFA	prfA	prfA	0	0.73913	nc	Ribosome translational (termination) factor	PCRF domain	peptide chain release factor 1-like, mitochondrial isoform 1 [Homo sapiens]. MTRF1L mitochondrial translational release factor 1 like [ Homo sapiens (human) ]. The protein encoded by this gene plays a role in mitochondrial translation termination, and is thought to be a release factor that is involved in the dissociation of the complete protein from the final tRNA, the ribosome, and the cognate m…
072	PYRD	DHODH	DHODH	0	0.521739	nc	Pyrimidine biosynthesis	Belongs to the dihydroorotate dehydrogenase family. Type 2 subfamily	dihydroorotate dehydrogenase (quinone), mitochondrial isoform X1 [Homo sapiens]. DHODH dihydroorotate dehydrogenase (quinone) [ Homo sapiens (human) ]. The protein encoded by this gene catalyzes the fourth enzymatic step, the ubiquinone-mediated oxidation of dihydroorotate to orotate, in de novo pyrimidine biosynthesis. This protein is a mitochondrial protein located on the outer surface of the i…
073	RLMN	rlmN	rlmN	0	0.304348	nc	rRNA modification/maturation	4Fe-4S single cluster domain	Radical SAM superfamily protein [Arabidopsis thaliana]. 23S rRNA (adenine(2503)-C(2))-methyltransferase RlmN [Rhodospirillaceae bacterium SYSU D60014]
074	RPL31	rpl31	rpl31/rpmE	0.173913	0	mt	Ribosome large subunit	Binds the 23S rRNA
075	RPL36	rpl36	rpl36/rpmJ	0.0434783	0.0434783	ncmt	Ribosome large subunit		39S ribosomal protein L36, mitochondrial [Homo sapiens]. MRPL36 mitochondrial ribosomal protein L36 [ Homo sapiens (human) ]. Mammalian mitochondrial ribosomal proteins are encoded by nuclear genes and help in protein synthesis within the mitochondrion. Mitochondrial ribosomes (mitoribosomes) consist of a small 28S subunit and a large 39S subunit. They have an estimated 75% protein to rRNA compos…
076	RPLA	rpl1	rpl1/rplA	0.173913	0.608696	ncmt	Ribosome large subunit	Binds directly to 23S rRNA. The L1 stalk is quite mobile in the ribosome, and is involved in E site tRNA release	Mrpl1p [Saccharomyces cerevisiae AWRI796]. ribosomal protein uL1, mitochondrial. 50S ribosomal protein L1; Validated; PRK05424
077	RPLB	rpl2	rpl2/rplB	0.652174	0.26087	ncmt	Ribosome large subunit	One of the primary rRNA binding proteins. Required for association of the 30S and 50S subunits to form the 70S ribosome, for tRNA binding and peptide bond formation. It has been suggested to have peptidyltransferase activity	MRPL2 mitochondrial ribosomal protein L2 [ Homo sapiens (human) ]. 39S ribosomal protein L2, mitochondrial isoform X1 [Homo sapiens]. Mammalian mitochondrial ribosomal proteins are encoded by nuclear genes and help in protein synthesis within the mitochondrion. Mitochondrial ribosomes (mitoribosomes) consist of a small 28S subunit and a large 39S subunit. They have an estimated 75% protein to rRN…
078	RPLC	rplC	rplC	0	0.826087	nc	Ribosome large subunit	Belongs to the universal ribosomal protein uL3 family	39S ribosomal protein L3, mitochondrial [Homo sapiens]. MRPL3 mitochondrial ribosomal protein L3 [ Homo sapiens (human) ]. Mammalian mitochondrial ribosomal proteins are encoded by nuclear genes and help in protein synthesis within the mitochondrion. Mitochondrial ribosomes (mitoribosomes) consist of a small 28S subunit and a large 39S subunit. They have an estimated 75% protein to rRNA compositi…
079	RPLD	rpl4	rpl4	0	0.695652	nc	Ribosome large subunit	Forms part of the polypeptide exit tunnel	39S ribosomal protein L4, mitochondrial isoform a [Homo sapiens]. MRPL4 mitochondrial ribosomal protein L4 [ Homo sapiens (human) ]. Mammalian mitochondrial ribosomal proteins are encoded by nuclear genes and help in protein synthesis within the mitochondrion. Mitochondrial ribosomes (mitoribosomes) consist of a small 28S subunit and a large 39S subunit. They have an estimated 75% protein to rRNA…
080	RPLF	rpl6	rpl6/rplF	0.565217	0.173913	ncmt	Ribosome large subunit	This protein binds to the 23S rRNA, and is important in its secondary structure. It is located near the subunit interface in the base of the L7 L12 stalk, and near the tRNA binding site of the peptidyltransferase center	mitochondrial 54S ribosomal protein YmL16 [Saccharomyces cerevisiae S288C]. MRPL6 mitochondrial 54S ribosomal protein YmL16 [ Saccharomyces cerevisiae S288C ]. Ribosomal_L6; Ribosomal protein L6
081	RPLK	rpl11	rpl11/rplK	0.347826	0.608696	ncmt	Ribosome large subunit	Forms part of the ribosomal stalk which helps the ribosome interact with GTP-bound translation factors	39S ribosomal protein L11, mitochondrial isoform a [Homo sapiens]. MRPL11 mitochondrial ribosomal protein L11 [ Homo sapiens (human) ]. This nuclear gene encodes a 39S subunit component of the mitochondial ribosome. Alternative splicing results in multiple transcript variants. Pseudogenes for this gene are found on chromosomes 5 and 12. [provided by RefSeq, May 2014]
082	RPLP	rpl16	rpl16/rplP	0.869565	0.130435	ncmt	Ribosome large subunit	Binds 23S rRNA and is also seen to make contacts with the A and possibly P site tRNAs	39S ribosomal protein L16, mitochondrial [Homo sapiens]. MRPL16 mitochondrial ribosomal protein L16 [ Homo sapiens (human) ]. Mammalian mitochondrial ribosomal proteins are encoded by nuclear genes and help in protein synthesis within the mitochondrion. Mitochondrial ribosomes (mitoribosomes) consist of a small 28S subunit and a large 39S subunit. They have an estimated 75% protein to rRNA compos…
083	RPLT	rpl20	rpl20/rplT	0.130435	0.565217	ncmt	Ribosome large subunit	Binds directly to 23S ribosomal RNA and is necessary for the in vitro assembly process of the 50S ribosomal subunit. It is not involved in the protein synthesizing functions of that subunit	39S ribosomal protein L20, mitochondrial isoform 1 [Homo sapiens]. MRPL20 mitochondrial ribosomal protein L20 [ Homo sapiens (human) ]. Mammalian mitochondrial ribosomal proteins are encoded by nuclear genes and help in protein synthesis within the mitochondrion. Mitochondrial ribosomes (mitoribosomes) consist of a small 28S subunit and a large 39S subunit. They have an estimated 75% protein to r…
084	RPMA	rpl27	rpl27/rpmA	0.217391	0.0434783	ncmt	Ribosome large subunit	Belongs to the bacterial ribosomal protein bL27 family	39S ribosomal protein L27, mitochondrial [Homo sapiens]. MRPL27 mitochondrial ribosomal protein L27 [ Homo sapiens (human) ]. Mammalian mitochondrial ribosomal proteins are encoded by nuclear genes and help in protein synthesis within the mitochondrion. Mitochondrial ribosomes (mitoribosomes) consist of a small 28S subunit and a large 39S subunit. They have an estimated 75% protein to rRNA compos…
085	RPOC	rpoC	rpoC	0.217391	0	mt	RNA polymerase	DNA-dependent RNA polymerase catalyzes the transcription of DNA into RNA using the four ribonucleoside triphosphates as substrates
086	RPSB	rps2	rps2/rpsB	0.391304	0.391304	ncmt	Ribosome small subunit	Belongs to the universal ribosomal protein uS2 family	28S ribosomal protein S2, mitochondrial [Homo sapiens]. MRPS2 mitochondrial ribosomal protein S2 [ Homo sapiens (human) ]. Mammalian mitochondrial ribosomal proteins are encoded by nuclear genes and help in protein synthesis within the mitochondrion. Mitochondrial ribosomes (mitoribosomes) consist of a small 28S subunit and a large 39S subunit. They have an estimated 75% protein to rRNA compositi…
087	RPSD	rps4	rps4/rpsD	0.608696	0.0434783	ncmt	Ribosome small subunit	One of the primary rRNA binding proteins, it binds directly to 16S rRNA where it nucleates assembly of the body of the 30S subunit	ribosomal protein S4 (mitochondrion) [Andalucia godoyi]
088	RPSH	rps8	rps8/rpsH	0.478261	0	mt	Ribosome small subunit	One of the primary rRNA binding proteins, it binds directly to 16S rRNA central domain where it helps coordinate assembly of the platform of the 30S subunit
089	RPSI	RPS9/rpsI	RPS9/rpsI	0	0.826087	nc	Ribosome small subunit	structural constituent of ribosome	MRPS9 mitochondrial ribosomal protein S9 [ Homo sapiens (human) ]. Mammalian mitochondrial ribosomal proteins are encoded by nuclear genes and help in protein synthesis within the mitochondrion. Mitochondrial ribosomes (mitoribosomes) consist of a small 28S subunit and a large 39S subunit. They have an estimated 75% protein to rRNA composition compared to prokaryotic ribosomes, where this ratio i…
090	RPSN	rps14	rps14/rpsN	0.695652	0.130435	ncmt	Ribosome small subunit	Binds 16S rRNA, required for the assembly of 30S particles and may also be responsible for determining the conformation of the 16S rRNA at the A site	28S ribosomal protein S14, mitochondrial [Homo sapiens]. MRPS14 mitochondrial ribosomal protein S14 [ Homo sapiens (human) ]. Mammalian mitochondrial ribosomal proteins are encoded by nuclear genes and help in protein synthesis within the mitochondrion. Mitochondrial ribosomes (mitoribosomes) consist of a small 28S subunit and a large 39S subunit. They have an estimated 75% protein to rRNA compos…
091	RPSS	rps19	rps19/rpsS	0.695652	0.217391	ncmt	Ribosome small subunit	Protein S19 forms a complex with S13 that binds strongly to the 16S ribosomal RNA	mitochondrial 37S ribosomal protein RSM19 [Saccharomyces cerevisiae S288C]. RSM19 mitochondrial 37S ribosomal protein RSM19 [ Saccharomyces cerevisiae S288C ]
092	SDH4	SDH4	SDH4	0.304348	0	mt	Complex II subunit/assembly factor		succinate dehydrogenase subunit 4 [Arabidopsis thaliana]. SDH4 succinate dehydrogenase subunit 4 [ Arabidopsis thaliana (thale cress) ]. Encodes succinate dehydrogenase, a component of mitochondrial respiratory complex II. Nuclear encoded gene which is imported into the mitochondrion.
093	SDHA	SDH1/SDHA	SDH1/SDHA	0	0.869565	nc	Complex II subunit/assembly factor	Flavoprotein (FP) subunit of succinate dehydrogenase (SDH) that is involved in complex II of the mitochondrial electron transport chain and is responsible for transferring electrons from succinate to ubiquinone (coenzyme Q)	succinate dehydrogenase [ubiquinone] flavoprotein subunit, mitochondrial isoform 1 [Homo sapiens]. SDHA succinate dehydrogenase complex flavoprotein subunit A [ Homo sapiens (human) ]. This gene encodes a major catalytic subunit of succinate-ubiquinone oxidoreductase, a complex of the mitochondrial respiratory chain. The complex is composed of four nuclear-encoded subunits and is localized in the…
094	SDHB	SDH2/sdhB	SDH2/sdhB	0.217391	0.73913	ncmt	Complex II subunit/assembly factor	Iron-sulfur protein (IP) subunit of succinate dehydrogenase (SDH) that is involved in complex II of the mitochondrial electron transport chain and is responsible for transferring electrons from succinate to ubiquinone (coenzyme Q)	succinate dehydrogenase [ubiquinone] iron-sulfur subunit, mitochondrial precursor [Homo sapiens]. SDHB succinate dehydrogenase complex iron sulfur subunit B [ Homo sapiens (human) ]. Complex II of the respiratory chain, which is specifically involved in the oxidation of succinate, carries electrons from FADH to CoQ. The complex is composed of four nuclear-encoded subunits and is localized in the …
095	SDHC	SDHC	SDHC	0.434783	0.347826	ncmt	Complex II subunit/assembly factor	Succinate dehydrogenase, cytochrome b556 subunit	succinate dehydrogenase cytochrome b560 subunit, mitochondrial isoform 1 precursor [Homo sapiens]. SDHC succinate dehydrogenase complex subunit C [ Homo sapiens (human) ]. This gene encodes one of four nuclear-encoded subunits that comprise succinate dehydrogenase, also known as mitochondrial complex II, a key enzyme complex of the tricarboxylic acid cycle and aerobic respiratory chains of mitoch…
096	SUCA	OGDH	OGDH/KGD1/sucA	0	0.913043	nc	Krebs cycle	oxoglutarate dehydrogenase (succinyl-transferring) activity	2-oxoglutarate dehydrogenase, mitochondrial isoform 3 precursor [Homo sapiens]. OGDH oxoglutarate dehydrogenase [ Homo sapiens (human) ]. This gene encodes one subunit of the 2-oxoglutarate dehydrogenase complex. This complex catalyzes the overall conversion of 2-oxoglutarate (alpha-ketoglutarate) to succinyl-CoA and CO(2) during the Krebs cycle. The protein is located in the mitochondrial matrix…
098	SUCD	SUCLG1	SUCLG1	0	0.913043	nc	Krebs cycle	Succinyl-CoA synthetase functions in the citric acid cycle (TCA), coupling the hydrolysis of succinyl-CoA to the synthesis of ATP and thus represents the only step of substrate- level phosphorylation in the TCA. The alpha subunit of the enzyme binds the substrates coenzyme A and phosphate, while succinate binding and nucleotide specificity is provided by the beta subunit	SUCLG1 succinate-CoA ligase alpha subunit [ Homo sapiens (human) ]. This gene encodes the alpha subunit of the heterodimeric enzyme succinate coenzyme A ligase. This enzyme is targeted to the mitochondria and catalyzes the conversion of succinyl CoA and ADP or GDP to succinate and ATP or GTP. Mutations in this gene are the cause of the metabolic disorder fatal infantile lactic acidosis and mitoch…
099	SURF1	SHY1	SHY1	0	0.73913	nc	Complex IV subunit/assembly factor	Probably involved in the biogenesis of the COX complex	SURF1 SURF1 cytochrome c oxidase assembly factor [ Homo sapiens (human) ]. This gene encodes a protein localized to the inner mitochondrial membrane and thought to be involved in the biogenesis of the cytochrome c oxidase complex. The protein is a member of the SURF1 family, which includes the related yeast protein SHY1 and rickettsial protein RP733. The gene is located in the surfeit gene cluste…
100	TATC	tatC	YMF16/TATC/tatC	0.478261	0	mt	Protein import/export	Part of the twin-arginine translocation (Tat) system that transports large folded proteins containing a characteristic twin-arginine motif in their signal peptide across membranes. Together with TatB, TatC is part of a receptor directly interacting with Tat signal peptides	Sec-independent protein translocase component TatC (mitochondrion) [Andalucia godoyi]. tatC Sec-independent protein translocase component TatC [ Andalucia godoyi ]
101	TILS	tilS	tilS	0	0.521739	nc	Aminoacyl-tRNA synthetase	Ligates lysine onto the cytidine present at position 34 of the AUA codon-specific tRNA(Ile) that contains the anticodon CAU, in an ATP-dependent manner. Cytidine is converted to lysidine, thus changing the amino acid specificity of the tRNA from methionine to isoleucine	tRNA(Ile)-lysidine synthetase [Klebsormidium nitens]. tRNA(Ile)-lysidine synthetase, variant 3 [Aphanomyces astaci]. tRNA(Ile)-lysidine synthetase [Pichia kudriavzevii]
102	TRME	mnmE	mnmE/GTPBP3	0	0.478261	nc	tRNA modification/maturation	Exhibits a very high intrinsic GTPase hydrolysis rate. Involved in the addition of a carboxymethylaminomethyl (cmnm) group at the wobble position (U34) of certain tRNAs, forming tRNA- cmnm(5)s(2)U34	tRNA modification GTPase GTPBP3, mitochondrial isoform V [Homo sapiens]. GTPBP3 GTP binding protein 3, mitochondrial [ Homo sapiens (human) ]. This locus encodes a GTP-binding protein. The encoded protein is localized to the mitochondria and may play a role in mitochondrial tRNA modification. Polymorphisms at this locus may be associated with severity of aminoglycoside-induced deafness, a disease…
103	TUFA	tufA	tufA	0.173913	0.73913	ncmt	Ribosome translational (elongation) factor	This protein promotes the GTP-dependent binding of aminoacyl-tRNA to the A-site of ribosomes during protein biosynthesis	elongation factor Tu, mitochondrial isoform 1 precursor [Homo sapiens]. TUFM Tu translation elongation factor, mitochondrial [ Homo sapiens (human) ]. This gene encodes a protein which participates in protein translation in mitochondria. Mutations in this gene have been associated with combined oxidative phosphorylation deficiency resulting in lactic acidosis and fatal encephalopathy. A pseudogen…
104	TYPA	TypA	BipA/TypA	0	0.652174	nc	Ribosome translational (fidelity) factor	GTP-binding protein TypA	translation factor GUF1, mitochondrial isoform 3 [Homo sapiens]. GUF1 GUF1 homolog, GTPase [ Homo sapiens (human) ]. This gene encodes a GTPase that triggers back-translocation of the elongating ribosome during mitochondrial protein synthesis. The protein contains a highly conserved C-terminal domain not found in other GTPases that facilitates tRNA binding. The encoded protein is thought to preve…
105	UBIE	COQ5	COQ5	0	0.608696	nc	Ubiquinone biosynthesis	ATP-dependent DNA helicase activity	2-methoxy-6-polyprenyl-1,4-benzoquinol methylase, mitochondrial precursor [Homo sapiens]. COQ5 coenzyme Q5, methyltransferase [ Homo sapiens (human) ]
106	UBIG	COQ3	COQ3	0	0.478261	nc	Ubiquinone biosynthesis	O-methyltransferase that catalyzes the 2 O-methylation steps in the ubiquinone biosynthetic pathway	methyltransferase COQ3 [Homo sapiens]. COQ3 coenzyme Q3, methyltransferase [ Homo sapiens (human) ]. Ubiquinone, also known as coenzyme Q, or Q, is a critical component of the electron transport pathways of both eukaryotes and prokaryotes (Jonassen and Clarke, 2000 [PubMed 10777520]). This lipid consists of a hydrophobic isoprenoid tail and a quinone head group. The tail varies in length dependin…
107	YBJT	NDUFA9	NDUFA9	0	0.869565	nc	Complex I subunit/assembly factor	NmrA-like family	Chain J, NADH dehydrogenase [ubiquinone] 1 alpha subcomplex subunit 9, mitochondrial. NDUFA9 NADH:ubiquinone oxidoreductase subunit A9 [ Homo sapiens (human) ]. The encoded protein is a subunit of the hydrophobic protein fraction of the NADH:ubiquinone oxidoreductase (complex I), the first enzyme complex in the electron transport chain located in the inner mitochondrial membrane. A pseudogene has…
108	YFJG	COQ10	COQ10	0	0.695652	nc	Ubiquinone biosynthesis	Coenzyme Q-binding protein COQ10 homolog	coenzyme Q-binding protein COQ10 homolog B, mitochondrial isoform 4 [Homo sapiens]. COQ10B coenzyme Q10B [ Homo sapiens (human) ]
109	YGFZ	IBA57	IBA57	0	0.695652	nc	Iron-sulfur cluster biogenesis	IBA57, iron-sulfur cluster assembly homolog (S. cerevisiae)	putative transferase CAF17, mitochondrial isoform 1 precursor [Homo sapiens]. The protein encoded by this gene localizes to the mitochondrion and is part of the iron-sulfur cluster assembly pathway. The encoded protein functions late in the biosynthesis of mitochondrial 4Fe-4S proteins. Defects in this gene have been associated with autosomal recessive spastic paraplegia-74 and with multiple mito…
110	YHCM	AFG1	AFG1/zapE	0	0.782609	nc	Complex IV subunit/assembly factor	AFG1-like ATPase	AFG1-like ATPase isoform b. This gene encodes a mitochondrial integral membrane protein that plays a role in mitochondrial protein homeostasis. The protein contains a P-loop motif and a five-domain structure that is conserved in fly, yeast, and bacteria. It functions to mediate the degradation of nuclear-encoded complex IV subunits. Two conserved estrogen receptor binding sites are located within…
111	YRDA	GAMMACA1	GAMMACA1	0	0.695652	nc	Complex I subunit/assembly factor	gamma carbonic anhydrase	GAMMA CA2 gamma carbonic anhydrase 2 [ Arabidopsis thaliana (thale cress) ]. Encodes mitochondrial gamma carbonic anhydrase. Component of the NADH dehydrogenase complex.
