# Supplementary material for: A site-and-branch-heterogeneous model on an expanded dataset favor mitochondria as sister to known Alphaproteobacteria
Source: Research Square preprint supplement (doi:10.21203/rs.3.rs-557223/v1), 2021-05-28
Supplement: Supplementary file 11 [file 9fd7311a43e9939f1de58b8b.xlsx]

## Sheet: Table S4
Table S4. Summary of major features for genomes and MAGs that belong to the Magnetococcia, MarineProteo1 clade, and Rickettsiales.
Genome/MAG name	Source	Taxonomy (GTDB)	Taxonomy (this study)	Completeness	Contamination	Strain heterogeneity	Genome size	Contig number	N50	GC content	116x108	Bch genes	Mic60
GCA_002753095	GTDB r95	o__Magnetococcales;f__WMHbin3_A	Magnetococcia	89.5	3.04	20	3583729	177	34600	55.9136	0	2	0
GCA_002753135	GTDB r95	o__Magnetococcales;f__WMHbin3_A	Magnetococcia	90.82	3.04	0	3839927	80	85378	55.4268	0	1	0
GCA_002753185	GTDB r95	o__Magnetococcales;f__WMHbin3	Magnetococcia	88.51	2.73	0	4601373	157	51212	61.4747	0	3	0
GCA_002753495	GTDB r95	o__Magnetococcales;f__DC0425bin3	Magnetococcia	68.58	3.38	20	2895658	316	13187	62.0856	0	1	0
GCA_002753505	GTDB r95	o__Magnetococcales;f__WMHbin3_A	Magnetococcia	92.91	5.14	0	4188618	200	38237	56.798	0	0	0
GCA_002753515	GTDB r95	o__Magnetococcales;f__UBA8363	Magnetococcia	91.53	4.39	0	4326896	134	54627	53.2456	0	3	0
GCA_002753565	GTDB r95	o__Magnetococcales;f__UBA8363	Magnetococcia	95.58	3.38	20	3866744	92	116043	52.2773	0	1	0
GCA_002753615	GTDB r95	o__Magnetococcales;f__UBA8363	Magnetococcia	75.65	3.38	16.67	3364396	201	24837	51.8326	0	3	0
GCA_002753665	GTDB r95	o__Magnetococcales;f__DC0425bin3	Magnetococcia	92.91	3.72	0	3696616	230	26687	65.714	0	3	0
GCA_002753735	GTDB r95	o__Magnetococcales;f__UBA8363	Magnetococcia	89.53	3.72	0	4521331	148	49732	54.2154	0	3	0
GCF_000014865	GTDB r95	o__Magnetococcales;f__Magnetococcaceae	Magnetococcia	94.93	2.7	0	4719581	1	4719581	54.1081	0	3	0
GCF_002109495	GTDB r95	o__Magnetococcales;f__Magnetococcaceae	Magnetococcia	92.91	2.7	0	4986701	21	705613	61.2119	0	3	0
GCF_004217665	GTDB r95	o__Magnetococcales;f__WMHbin3_A	Magnetococcia	90.52	6.42	33.33	4143644	546	13993	52.5682	0	2	0
GCA_002328405	GTDB r95	o__UBA1280;f__UBA2136	MarineProteo1	91.55	0	0	1727890	10	198711	44.3631	0	0	0
GCA_002422365	GTDB r95	o__UBA1280;f__UBA6156	MarineProteo1	84.67	1.35	50	1273710	47	47278	59.6863	1	0	0
GCA_002436405	GTDB r95	o__UBA1280;f__UBA6503	MarineProteo1	89.53	0	0	1805728	5	994047	47.8605	1	0	0
GCA_002689455	GTDB r95	o__UBA1280;f__UBA2136	MarineProteo1	82.22	2.7	0	1611762	75	23603	38.7595	0	0	0
GCA_002791805	GTDB r95	o__UBA1280;f__UBA6156	MarineProteo1	84.44	0.68	0	1266716	98	15979	53.459	0	0	0
GCA_002937495	GTDB r95	o__UBA1280;f__UBA12223	MarineProteo1	72.43	0	0	1007872	149	8648	31.305	0	0	0
GCA_003241595	GTDB r95	o__UBA1280;f__UBA6156	MarineProteo1	80.64	0.14	0	1373951	95	23064	56.0874	0	0	0
GCA_003450915	GTDB r95	o__UBA1280;f__UBA12223	MarineProteo1	78.38	0.12	0	1339160	217	7299	31.7431	0	0	0
GCA_005768725	GTDB r95	o__UBA1280;f__UBA6156	MarineProteo1	91.22	0	0	1710824	10	1023757	56.1804	0	0	0
Proteobacteria_bacterium_PTJW	Martijn et al., (2018)	o__UBA1280;f__UBA12223	MarineProteo1	72.43	0	0	1007872	149	8648	31.305	0	0	0
Proteobacteria_bacterium_PTJX	Martijn et al., (2018)	o__UBA1280;f__UBA2136	MarineProteo1	57.17	1.35	0	1054257	288	3691	38.9416	0	0	0
TARA_PSW_MAG_00024	Delmont et al., (2018)	o__UBA1280;f__	MarineProteo1	89.28	1.69	0	1569057	117	17956	50.7485	1	0	0
TOBG_ARS_4	Tully et al., (2018)	o__UBA1280;f__UBA2136	MarineProteo1	91.55	2.7	100	1794382	13	278926	44.2611	0	0	0
TOBG_MED_694	Tully et al., (2018)	o__UBA1280;f__UBA2136	MarineProteo1	82.22	2.7	0	1611850	75	23603	38.7605	0	0	0
TOBG_SAT_227	Tully et al., (2018)	o__UBA1280;f__UBA6503	MarineProteo1	93.58	6.66	0	2716820	22	730128	39.7482	0	0	0
Alphaproteobacterium_LLAM-11	This study	o__UBA1280;f__	MarineProteo1	66.5	1.35	0	915395	135	8333	50.227	1	0	0
GCA_002422795	GTDB r95	o__Rickettsiales;f__UBA6187	Rickettsiales	94.91	1.69	25	2365046	115	34614	40.3447	0	0	1
GCA_002787635	GTDB r95	o__Rickettsiales;f__UBA6187	Rickettsiales	99.32	1.01	0	2303631	31	151859	39.3068	1	0	1
TARA_ANE_MAG_00011	Delmont et al., (2018)	o__Rickettsiales;f__	Rickettsiales	94.93	0.02	100	2368516	57	62552	39.9483	1	1	1
GCA_003531345	GTDB r95	o__Rickettsiales;f__UBA8987	Rickettsiales	71.6	0.84	100	1478684	246	6800	37.1725	0	0	0
Alphaproteobacterium_LLAM-13	This study	o__Rickettsiales;f__UBA8987	Rickettsiales	98.65	0	0	1927282	26	156721	50.3289	1	0	1
GCA_002787615	GTDB r95	o__Rickettsiales;f__21-14-0-20-44-7	Rickettsiales	82.65	0.23	100	1508026	128	15019	43.7569	1	1	0
GCA_002291845	GTDB r95	o__Rickettsiales;f__UBA998	Rickettsiales	93.17	1.69	0	1887187	110	25872	55.1481	0	0	1
GCA_002291925	GTDB r95	o__Rickettsiales;f__UBA998	Rickettsiales	97.3	2.03	75	2177873	77	49814	61.273	1	0	0
GCA_002346425	GTDB r95	o__Rickettsiales;f__UBA3002	Rickettsiales	94.74	1.52	0	2261424	82	46614	52.6151	0	0	0
GCA_002422205	GTDB r95	o__Rickettsiales;f__UBA3002	Rickettsiales	95.79	2.7	0	2178574	52	70395	52.7986	0	0	0
GCA_002422745	GTDB r95	o__Rickettsiales;f__UBA3002	Rickettsiales	80.47	0.34	0	1763087	209	10769	58.3654	1	0	0
GCA_002423155	GTDB r95	o__Rickettsiales;f__UBA998	Rickettsiales	98.65	0	0	2098247	60	54803	41.8034	0	0	0
GCA_002697725	GTDB r95	o__Rickettsiales;f__UBA3002	Rickettsiales	63.5	1.77	0	1784843	113	16357	52.0588	0	0	0
GCA_002725445	GTDB r95	o__Rickettsiales;f__UBA3002	Rickettsiales	72.3	0.19	0	1626400	167	10168	52.0321	0	0	0
GCA_003241645	GTDB r95	o__Rickettsiales;f__UBA3002	Rickettsiales	97.15	0.68	0	2156760	121	29932	60.0864	0	0	0
GCA_004292675	GTDB r95	o__Rickettsiales;f__UBA998	Rickettsiales	87.16	1.01	0	1596562	45	65940	46.0596	0	0	0
GCA_004293935	GTDB r95	o__Rickettsiales;f__UBA998	Rickettsiales	88.85	0.34	0	1729837	39	80584	46.5146	0	0	0
GCA_005792635	GTDB r95	o__Rickettsiales;f__SXRF01	Rickettsiales	95.36	0.68	0	1951855	128	20423	46.5488	0	1	0
TARA_PSE_MAG_00045	Delmont et al., (2018)	o__Rickettsiales;f__UBA3002	Rickettsiales	74.05	1.01	50	1519890	195	9894	52.0945	1	0	0
TARA_RED_MAG_00037	Delmont et al., (2018)	o__Rickettsiales;f__UBA3002	Rickettsiales	93.5	2.7	0	2018209	245	10199	52.4765	0	0	0
TOBG_NAT_31	Tully et al., (2018)	o__Rickettsiales;f__UBA3002	Rickettsiales	63.5	1.77	0	1784843	113	16357	52.0588	0	0	0
TOBG_RS_372	Tully et al., (2018)	o__Rickettsiales;f__UBA3002	Rickettsiales	72.3	0.19	0	1626400	167	10168	52.0321	0	0	0
Alphaproteobacterium_LLAM-14	This study	o__Rickettsiales;f__	Rickettsiales	97.3	0.68	0	2305624	68	58895	51.7373	1	0	0
Alphaproteobacterium_LLAM-46	This study	o__Rickettsiales;f__UBA3002	Rickettsiales	98.65	0	0	1978876	26	121528	57.14	0	0	0
GCA_000512675	GTDB r95	o__Rickettsiales;f__Anaplasmataceae	Rickettsiales_Anaplasmataceae	69.93	0	0	1039565	9	206597	32.0757	0	0	0
GCA_001730065	GTDB r95	o__Rickettsiales;f__AB1-6	Rickettsiales_Anaplasmataceae	48.88	0	0	435544	8	83847	21.5848	0	0	0
GCA_001767955	GTDB r95	o__Rickettsiales;f__UBA1997	Rickettsiales_Anaplasmataceae	97.3	0.34	0	1442015	38	47394	40.1075	0	0	0
GCA_002325765	GTDB r95	o__Rickettsiales;f__AB1-6	Rickettsiales_Anaplasmataceae	34.97	0	0	612591	61	20361	23.5413	0	0	0
GCA_002335845	GTDB r95	o__Rickettsiales;f__UBA1997	Rickettsiales_Anaplasmataceae	91.14	13.18	0	1662897	173	12523	32.7277	0	0	0
GCA_002359655	GTDB r95	o__Rickettsiales;f__UBA1997	Rickettsiales_Anaplasmataceae	98.29	0.68	0	1760863	55	49124	36.2014	0	0	0
GCA_002394665	GTDB r95	o__Rickettsiales;f__UBA4311	Rickettsiales_Anaplasmataceae	79.01	0.84	0	1009979	13	192414	33.4364	0	0	0
GCA_002395105	GTDB r95	o__Rickettsiales;f__UBA4311	Rickettsiales_Anaplasmataceae	70.37	0	0	721532	15	82313	27.618	0	0	0
GCA_002707585	GTDB r95	o__Rickettsiales;f__UBA1997	Rickettsiales_Anaplasmataceae	50	0	0	620106	24	28851	28.1571	0	0	0
GCA_003516275	GTDB r95	o__Rickettsiales;f__Anaplasmataceae	Rickettsiales_Anaplasmataceae	54.02	0.74	50	668079	117	5761	33.7053	0	0	0
GCA_005787525	GTDB r95	o__Rickettsiales;f__UBA1997	Rickettsiales_Anaplasmataceae	92.65	1.01	0	1462267	92	21402	32.4859	0	0	0
GCF_000008025	GTDB r95	o__Rickettsiales;f__Anaplasmataceae	Rickettsiales_Anaplasmataceae	96.96	0	0	1267782	1	1267782	35.2307	0	0	0
GCF_000008385	GTDB r95	o__Rickettsiales;f__Anaplasmataceae	Rickettsiales_Anaplasmataceae	96.28	0	0	1080084	1	1080084	34.174	0	0	0
GCF_000012565	GTDB r95	o__Rickettsiales;f__Anaplasmataceae	Rickettsiales_Anaplasmataceae	95.27	0.68	100	1315030	1	1315030	28.9503	0	0	0
GCF_000013145	GTDB r95	o__Rickettsiales;f__Anaplasmataceae	Rickettsiales_Anaplasmataceae	95.27	2.03	100	1176248	1	1176248	30.0915	0	0	0
GCF_000013165	GTDB r95	o__Rickettsiales;f__Anaplasmataceae	Rickettsiales_Anaplasmataceae	88.12	0	0	859006	1	859006	41.0814	0	0	0
GCF_000022525	GTDB r95	o__Rickettsiales;f__Anaplasmataceae	Rickettsiales_Anaplasmataceae	88.77	0	0	879977	1	879977	41.2689	0	0	0
GCF_000024505	GTDB r95	o__Rickettsiales;f__Anaplasmataceae	Rickettsiales_Anaplasmataceae	99.16	1.69	100	1206806	1	1206806	49.9884	0	0	0
GCF_000026005	GTDB r95	o__Rickettsiales;f__Anaplasmataceae	Rickettsiales_Anaplasmataceae	93.92	0.68	100	1516355	1	1516355	27.4752	0	0	0
GCF_000306885	GTDB r95	o__Rickettsiales;f__Anaplasmataceae	Rickettsiales_Anaplasmataceae	90.88	0	0	957990	1	957990	32.0787	0	0	0
GCF_000376585	GTDB r95	o__Rickettsiales;f__Anaplasmataceae	Rickettsiales_Anaplasmataceae	96.62	0.34	0	1301823	1	1301823	34.0044	0	0	0
GCF_000508225	GTDB r95	o__Rickettsiales;f__Anaplasmataceae	Rickettsiales_Anaplasmataceae	93.92	0.68	100	1196717	1	1196717	29.6627	0	0	0
GCF_000632845	GTDB r95	o__Rickettsiales;f__Anaplasmataceae	Rickettsiales_Anaplasmataceae	95.27	0.68	100	1148904	1	1148904	29.6404	0	0	0
GCF_000632985	GTDB r95	o__Rickettsiales;f__Anaplasmataceae	Rickettsiales_Anaplasmataceae	93.52	0	0	884232	1	884232	41.6903	0	0	0
GCF_000825765	GTDB r95	o__Rickettsiales;f__Anaplasmataceae	Rickettsiales_Anaplasmataceae	94.59	1.04	80	1414910	187	32220	37.2828	0	0	0
GCF_000829315	GTDB r95	o__Rickettsiales;f__Anaplasmataceae	Rickettsiales_Anaplasmataceae	96.28	0.68	100	1250060	1	1250060	36.2558	0	0	0
GCF_000964685	GTDB r95	o__Rickettsiales;f__Anaplasmataceae	Rickettsiales_Anaplasmataceae	95.95	5.07	77.78	1479407	1	1479407	41.6421	0	0	0
GCF_000964795	GTDB r95	o__Rickettsiales;f__Anaplasmataceae	Rickettsiales_Anaplasmataceae	96.96	0.68	100	1268660	1	1268660	27.747	0	0	0
GCF_001439985	GTDB r95	o__Rickettsiales;f__Anaplasmataceae	Rickettsiales_Anaplasmataceae	96.62	0	0	1133809	1	1133809	33.6553	0	0	0
GCF_001593535	GTDB r95	o__Rickettsiales;f__Anaplasmataceae	Rickettsiales_Anaplasmataceae	88.12	0	0	859205	1	859205	41.0682	0	0	0
GCF_001648025	GTDB r95	o__Rickettsiales;f__Anaplasmataceae	Rickettsiales_Anaplasmataceae	93.58	0	0	1170639	157	13699	35.1395	0	0	0
GCF_001752665	GTDB r95	o__Rickettsiales;f__Anaplasmataceae	Rickettsiales_Anaplasmataceae	93.56	0.68	100	975127	12	95550	32.1733	0	0	0
GCF_001931755	GTDB r95	o__Rickettsiales;f__Anaplasmataceae	Rickettsiales_Anaplasmataceae	96.62	2.93	8.57	1801626	1	1801626	34.3488	0	0	0
GCF_002214625	GTDB r95	o__Rickettsiales;f__Anaplasmataceae	Rickettsiales_Anaplasmataceae	98.65	1.18	66.67	1214674	1	1214674	48.8634	0	0	0
GCF_002379155	GTDB r95	o__Rickettsiales;f__Anaplasmataceae	Rickettsiales_Anaplasmataceae	88.18	0.23	0	1050428	111	15814	35.5021	0	0	0
GCF_002849345	GTDB r95	o__Rickettsiales;f__Anaplasmataceae	Rickettsiales_Anaplasmataceae	98.99	0.34	100	1159730	43	65348	49.6937	0	0	0
GCF_003344345	GTDB r95	o__Rickettsiales;f__Anaplasmataceae	Rickettsiales_Anaplasmataceae	94.59	6.08	100	2109518	237	17546	34.9706	0	0	0
GCF_004171285	GTDB r95	o__Rickettsiales;f__Anaplasmataceae	Rickettsiales_Anaplasmataceae	95.61	0.68	100	1484007	1	1484007	34.424	0	0	0
GCA_000970895	GTDB r95	o__Rickettsiales;f__Arcanobacteraceae	Rickettsiales_Arcanobacteriaceae	47.09	1.35	50	822563	151	12448	32.385	0	0	0
GCA_002422875	GTDB r95	o__Rickettsiales;f__UBA6177	Rickettsiales_Arcanobacteriaceae	85.47	1.01	50	1073326	34	55981	30.3926	0	0	1
GCF_000746585	GTDB r95	o__Rickettsiales;f__Arcanobacteraceae	Rickettsiales_Arcanobacteriaceae	100	0.34	0	1917564	3	1851238	30.7517	1	0	1
GCF_000219355	GTDB r95	o__Rickettsiales;f__Midichloriaceae	Rickettsiales_Midichloriaceae	100	0.68	100	1183732	1	1183732	36.5545	0	0	0
GCF_000730245	GTDB r95	o__Rickettsiales;f__Midichloriaceae	Rickettsiales_Midichloriaceae	98.99	0	0	1615277	1	1615277	34.7669	0	0	0
GCF_000815465	GTDB r95	o__Rickettsiales;f__Midichloriaceae	Rickettsiales_Midichloriaceae	99.66	0.68	0	2370652	249	77406	33.5457	1	0	0
GCF_003072485	GTDB r95	o__Rickettsiales;f__Midichloriaceae	Rickettsiales_Midichloriaceae	82.88	0	0	837348	1	837348	35.7907	0	0	0
GCF_003953955	GTDB r95	o__Rickettsiales;f__Midichloriaceae	Rickettsiales_Midichloriaceae	97.3	0.4	50	1284848	155	10860	28.3717	0	0	0
GCF_004210275	GTDB r95	o__Rickettsiales;f__Midichloriaceae	Rickettsiales_Midichloriaceae	90.54	2.03	0	1375759	125	28559	40.8799	0	0	0
Alphaproteobacterium_ALCH-08	This study	o__Rickettsiales;f__Midichloriaceae	Rickettsiales_Midichloriaceae	83.45	0.68	0	1158325	164	8091	30.3263	0	0	0
GCA_001654785	GTDB r95	o__Rickettsiales;f__Rickettsiaceae	Rickettsiales_Rickettsiaceae	91.55	0	0	2026724	108	40823	30.762	0	0	0
GCA_001897445	GTDB r95	o__Rickettsiales;f__33-17	Rickettsiales_Rickettsiaceae	99.32	0	0	1883020	30	110029	33.0407	1	0	0
GCA_002402195	GTDB r95	o__Rickettsiales;f__Rickettsiaceae	Rickettsiales_Rickettsiaceae	90.03	2.92	0	1905515	111	31025	40.2756	0	0	0
GCA_003963235	GTDB r95	o__Rickettsiales;f__Rickettsiaceae	Rickettsiales_Rickettsiaceae	85.59	0.34	0	1361144	88	21803	30.8439	0	0	0
GCA_005791235	GTDB r95	o__Rickettsiales;f__Rickettsiaceae	Rickettsiales_Rickettsiaceae	85.94	1.35	66.67	1215908	149	10394	33.8091	0	0	0
GCF_000008045	GTDB r95	o__Rickettsiales;f__Rickettsiaceae	Rickettsiales_Rickettsiaceae	100	0	0	1111496	1	1111496	28.9032	0	0	0
GCF_000012145	GTDB r95	o__Rickettsiales;f__Rickettsiaceae	Rickettsiales_Rickettsiaceae	100	1.35	33.33	1587240	3	1485148	32.5045	0	0	0
GCF_000012385	GTDB r95	o__Rickettsiales;f__Rickettsiaceae	Rickettsiales_Rickettsiaceae	99.32	0	0	1522076	1	1522076	31.647	0	0	0
GCF_000014345	GTDB r95	o__Rickettsiales;f__Rickettsiaceae	Rickettsiales_Rickettsiaceae	98.65	0	0	1159772	1	1159772	31.0441	0	0	0
GCF_000018205	GTDB r95	o__Rickettsiales;f__Rickettsiaceae	Rickettsiales_Rickettsiaceae	99.32	0	0	1231060	1	1231060	32.336	0	0	0
GCF_000255355	GTDB r95	o__Rickettsiales;f__Rickettsiaceae	Rickettsiales_Rickettsiaceae	99.32	0	0	1417115	2	1369927	32.217	0	0	0
GCF_000273745	GTDB r95	o__Rickettsiales;f__Rickettsiaceae	Rickettsiales_Rickettsiaceae	98.65	0	0	1320572	59	57972	32.3136	0	0	0
GCF_000284075	GTDB r95	o__Rickettsiales;f__Rickettsiaceae	Rickettsiales_Rickettsiaceae	100	0	0	1305467	2	1290368	32.3946	0	0	0
GCF_000309075	GTDB r95	o__Rickettsiales;f__Rickettsiaceae	Rickettsiales_Rickettsiaceae	95.27	8.46	0	1469252	301	50049	31.0173	0	0	0
GCF_000367405	GTDB r95	o__Rickettsiales;f__Rickettsiaceae	Rickettsiales_Rickettsiaceae	99.32	0	0	1109301	1	1109301	28.9985	0	0	0
GCF_000696365	GTDB r95	o__Rickettsiales;f__Rickettsiaceae	Rickettsiales_Rickettsiaceae	99.32	1.35	100	1657692	207	13458	32.0231	0	0	0
GCF_000825685	GTDB r95	o__Rickettsiales;f__Rickettsiaceae	Rickettsiales_Rickettsiaceae	99.32	0	0	1484812	2	1444049	32.3757	0	0	0
GCF_000828125	GTDB r95	o__Rickettsiales;f__Rickettsiaceae	Rickettsiales_Rickettsiaceae	100	4.05	100	1376743	88	28854	32.3201	0	0	0
GCF_000964595	GTDB r95	o__Rickettsiales;f__Rickettsiaceae	Rickettsiales_Rickettsiaceae	90.54	0	0	1092196	47	40251	29.4583	0	0	0
GCF_000964615	GTDB r95	o__Rickettsiales;f__Rickettsiaceae	Rickettsiales_Rickettsiaceae	65.46	2.7	50	1997698	76	29133	30.606	0	0	0
GCF_001951015	GTDB r95	o__Rickettsiales;f__Rickettsiaceae	Rickettsiales_Rickettsiaceae	100	0	0	1268242	1	1268242	32.4443	0	0	0
GCF_002259525	GTDB r95	o__Rickettsiales;f__Rickettsiaceae	Rickettsiales_Rickettsiaceae	97.97	0	0	1456176	193	12736	32.679	1	0	0
GCF_002285905	GTDB r95	o__Rickettsiales;f__Rickettsiaceae	Rickettsiales_Rickettsiaceae	98.65	0.68	100	1378618	1	1378618	32.468	0	0	0
GCF_003015145	GTDB r95	o__Rickettsiales;f__Rickettsiaceae	Rickettsiales_Rickettsiaceae	91.55	1.35	0	1472411	1	1472411	34.0673	0	0	0
GCF_003932735	GTDB r95	o__Rickettsiales;f__33-17	Rickettsiales_Rickettsiaceae	99.66	0	0	1738386	1	1738386	32.9948	0	0	0
Alphaproteobacterium_ALCH-09	This study	o__Rickettsiales;f__Rickettsiaceae	Rickettsiales_Rickettsiaceae	73.65	1.01	0	1064388	152	7704	33.1838	0	0	0
