# Supplementary material for: A site-and-branch-heterogeneous model on an expanded dataset favor mitochondria as sister to known Alphaproteobacteria
Source: Research Square preprint supplement (doi:10.21203/rs.3.rs-557223/v1), 2021-05-28
Supplement: Supplementary file 12 [file ec36dd718861bf801f5e950e.xlsx]

## Sheet: Table S7
Table S7. Eukaryotes used in this study for which both nuclear and mitochondrial genomes are available. The eukaryotic species Nitella sp. and Malawimonas sp. are chimeras whose nuclear and mitochondrial predicted proteomes come from different species within the genus.
Species name	Higher-level taxon	Mitochondrial genome source	Nuclear genome source
Andalucia godyi	Jakobida	NCBI GenBank (NC_021124.1)	NCBI GenBank (GCF_000313135.1)
Jakoba bahamiensis	Jakobida	NCBI GenBank (NC_021126.1)	TBestDB
Jakoba libera	Jakobida	NCBI GenBank (NC_021127.1)	TBestDB
Reclinomonas americana	Jakobida	NCBI GenBank (NC_001823.1)	TBestDB
Seculamonas ecuadoriensis	Jakobida	NCBI GenBank (NC_021128.1)	TBestDB
Cyanophora paradoxa	Plantae	NCBI GenBank (NC_017836.1)	http://cyanophora.rutgers.edu/cyanophora/
Nitella mirabilis/hyalina (chimera)	Plantae	NCBI GenBank (NC_017598.1)	NCBI GenBank (GBST00000000.1)
Mesostigma viride	Plantae	NCBI GenBank (NC_008240.1)	NCBI GenBank (GBSK00000000.1)
Klebsormidium nitens	Plantae	NCBI GenBank (DF238763.1)	NCBI GenBank (GBSO00000000.1)
Arabidopsis thaliana	Plantae	NCBI GenBank (NC_037304.1)	NCBI GenBank (GCF_000001735.4)
Chlamydomonas reinhardtii	Plantae	NCBI GenBank (NC_001638.1)	NCBI GenBank (GCA_000002595.3)
Capsaspora owczarzaki	Holozoa	NCBI GenBank (KC573038.1)	NCBI GenBank (GCF_000151315.2)
Allomyces macrogynus	Fungi	NCBI GenBank (NC_001715.1)	NCBI GenBank (GCA_000151295.1)
Acanthamoeba castellanii	Amoebozoa	NCBI GenBank (NC_001637.1)	NCBI GenBank (GCF_000313135.1)
Dictyostelium discoideum	Amoebozoa	NCBI GenBank (NC_000895.1)	NCBI GenBank (GCF_000004695.1)
Schizosaccharomyces pombe	Fungi	NCBI GenBank (NC_001326.1)	NCBI GenBank (GCF_000002945.1)
Palpitomonas bilix	Cryptista	NCBI GenBank (NC_031832.1)	iMicrobe (MMETSP0780)
Guillardia theta	Cryptista	NCBI GenBank (NC_041490.1)	NCBI GenBank (GCF_000315625.1)
Emiliania huxleyi	Haptista	NCBI GenBank (NC_005332.1)	NCBI GenBank (GCF_000372725.1)
Malawimonas sp. 248*/californiana (chimera)	Malawimonada	NCBI GenBank (NC_026311.1)	TBestDB
Malawimonas jakobiformis	Malawimonada	NCBI GenBank (NC_002553.1)	TBestDB
Phytophthora infestans	Heterokonta	NCBI GenBank (NC_002387.1)	NCBI GenBank (GCF_000142945.1)
Ectocarpus siliculosus	Heterokonta	NCBI GenBank (NC_030223.1)	NCBI GenBank (GCA_000310025.1)
*Malawimonas sp. 248 has recently been named Gefionella okellyi: https://doi.org/10.1098/rsos.171707
